# Supplementary material for: Differential gene expression associated with a floral scent polymorphism in the evening primrose Oenothera harringtonii (Onagraceae)
Source: BMC Genomics. 2022 Feb 12;23:124. doi: 10.1186/s12864-022-08370-6 (PMC8840323; doi:10.1186/s12864-022-08370-6)
Supplement: Supplementary file 1 — Additional file 1. Number of raw and clean paired reads per sample, and SRA BioSample IDs. [file 12864_2022_8370_MOESM1_ESM.xlsx]

## Sheet: Sheet1
Sequencing statistics and accession information for all samples included in this paper
Sample ID	Plant ID	Plant Part	Linalool	# Raw Reads	# Trimmed Reads	# Clean Reads	NCBI SRA BioSample ID
NW01	B	Stamens	+	48729691	46345861	46212911	SAMN08457438
NW02	B	Petals	+	47808665	46175656	45938813	SAMN08457435
NW03	B	Stigma/Style	+	49491187	47707837	47485690	SAMN08457439
NW04	B	Hypanthium	+	48595224	46785395	46615054	SAMN08457434
NW05	A	Stamens	+	47524668	45616417	45477539	SAMN08457428
NW06	A	Petals	+	48665858	45584556	45251656	SAMN08457427
NW07	A	Stigma/Style	+	48889684	46799533	46555274	SAMN08457429
NW08	A	Hypanthium	+	49591261	47714955	47342719	SAMN08457425
NW09	D	Stamens	-	47452833	45704496	45560639	SAMN08457451
NW10	D	Petals	-	49566411	47642293	47350600	SAMN08457449
NW11	D	Stigma/Style	-	48747392	46656739	46340645	SAMN08457452
NW12	D	Hypanthium	-	49533929	47637248	47510776	SAMN08457448
NW13	A	Bud	+	50276480	47791816	47690317	SAMN08457422
NW14	A	Leaf	+	47643259	45613836	45384472	SAMN08457420
NW15	B	Bud	+	51619065	49390218	49294225	SAMN08457433
NW16	B	Leaf	+	48462197	46554002	46135431	SAMN08457431
NW17	E	Stamens	-	53990696	51242734	51118054	SAMN08457459
NW18	E	Petals	-	46617295	44660341	44325823	SAMN08457458
NW19	E	Stigma/Style	-	76617439	73575826	73241926	SAMN08457460
NW20	E	Hypanthium	-	82519672	79798181	79576209	SAMN08457457
NW21	C	Stamens	+	904863	855798	822047	SAMN08457446
NW22	C	Petals	+	42094497	40036747	39274396	SAMN08457445
NW23	C	Stigma/Style	+	1196913	1143651	1118182	SAMN08457447
NW24	C	Hypanthium	+	46169083	44091765	43534355	SAMN08457441
NW25	E	Bud	-	54086617	51911414	51776861	SAMN08457456
NW26	E	Leaf	-	45032000	43054150	42868602	SAMN08457453
NW27	F	Stamens	-	65174914	62243833	62080741	SAMN08457465
NW28	F	Petals	-	51544574	48782806	48407148	SAMN08457464
NW29	F	Stigma/Style	-	51243282	48981834	42795185	SAMN08457466
NW30	F	Hypanthium	-	50668763	48432894	48314706	SAMN08457463
NW31	C	Bud	+	52558685	50408343	50224102	SAMN08457444
NW32	C	Leaf	+	51266040	49465246	48561814	SAMN08457440
