# Supplementary material for: Differential gene expression associated with a floral scent polymorphism in the evening primrose Oenothera harringtonii (Onagraceae)
Source: BMC Genomics. 2022 Feb 12;23:124. doi: 10.1186/s12864-022-08370-6 (PMC8840323; doi:10.1186/s12864-022-08370-6)
Supplement: Supplementary file 2 — Additional file 2. All GO term enrichments for each cluster of differentially expressed genes. [file 12864_2022_8370_MOESM2_ESM.xlsx]

## Sheet: cluster_1
Gene Ontology (GO) annotations for each cluster of differentially expressed genes
numDEInCat - number of differentially expressed genes in the category
numInCat = number of total genes annotated in this category
Ontologies include: Biological Process (BP), Molecular Function (MF), and Cellular Component (CC)
Cluster 10 includes genes up-regulated in linalool+ plants, including transcripts annotated as putative (R)-(-)-linalool synthase
category	over_represented_pvalue	under_represented_pvalue	numDEInCat	numInCat	term	ontology	over_represented_FDR	go_term
GO:0008610	1.30396e-13	1	30	1634	lipid biosynthetic process	BP	1.68159e-09	BP lipid biosynthetic process
GO:0044255	1.76825e-12	1	32	2096	cellular lipid metabolic process	BP	1.14017e-08	BP cellular lipid metabolic process
GO:0008299	4.31218e-11	1	15	423	isoprenoid biosynthetic process	BP	1.85366e-07	BP isoprenoid biosynthetic process
GO:0019288	5.93023e-11	1	7	37	isopentenyl diphosphate biosynthetic process, methylerythritol 4-phosphate pathway	BP	1.91191e-07	BP isopentenyl diphosphate biosynthetic process, methylerythritol 4-phosphate pathway
GO:0046577	1.04258e-10	1	5	10	long-chain-alcohol oxidase activity	MF	2.68902e-07	MF long-chain-alcohol oxidase activity
GO:0006629	1.32542e-10	1	34	2747	lipid metabolic process	BP	2.84876e-07	BP lipid metabolic process
GO:0019682	1.56773e-10	1	7	44	glyceraldehyde-3-phosphate metabolic process	BP	2.8882e-07	BP glyceraldehyde-3-phosphate metabolic process
GO:0032787	2.61785e-10	1	24	1492	monocarboxylic acid metabolic process	BP	3.60071e-07	BP monocarboxylic acid metabolic process
GO:0009240	2.79211e-10	1	7	43	isopentenyl diphosphate biosynthetic process	BP	3.60071e-07	BP isopentenyl diphosphate biosynthetic process
GO:0046490	2.79211e-10	1	7	43	isopentenyl diphosphate metabolic process	BP	3.60071e-07	BP isopentenyl diphosphate metabolic process
GO:0006720	4.11934e-10	1	15	494	isoprenoid metabolic process	BP	4.82936e-07	BP isoprenoid metabolic process
GO:0043436	1.14055e-09	1	34	3154	oxoacid metabolic process	BP	1.22571e-06	BP oxoacid metabolic process
GO:0006082	1.29241e-09	1	34	3166	organic acid metabolic process	BP	1.28207e-06	BP organic acid metabolic process
GO:0019752	1.56967e-09	1	33	3042	carboxylic acid metabolic process	BP	1.44589e-06	BP carboxylic acid metabolic process
GO:0016491	2.37805e-09	1	38	4030	oxidoreductase activity	MF	2.04449e-06	MF oxidoreductase activity
GO:0055114	5.33728e-09	1	30	2231	oxidation-reduction process	BP	4.30185e-06	BP oxidation-reduction process
GO:0010205	2.61061e-08	1	5	24	photoinhibition	BP	1.87036e-05	BP photoinhibition
GO:0043155	2.61061e-08	1	5	24	negative regulation of photosynthesis, light reaction	BP	1.87036e-05	BP negative regulation of photosynthesis, light reaction
GO:0044710	3.10433e-08	1	69	10476	single-organism metabolic process	BP	2.10702e-05	BP single-organism metabolic process
GO:0016114	7.62171e-08	1	11	359	terpenoid biosynthetic process	BP	4.70419e-05	BP terpenoid biosynthetic process
GO:0009642	7.66036e-08	1	9	200	response to light intensity	BP	4.70419e-05	BP response to light intensity
GO:0006081	1.04916e-07	1	8	153	cellular aldehyde metabolic process	BP	6.04985e-05	BP cellular aldehyde metabolic process
GO:0006090	1.07899e-07	1	10	303	pyruvate metabolic process	BP	6.04985e-05	BP pyruvate metabolic process
GO:0016705	1.43154e-07	1	17	1105	oxidoreductase activity, acting on paired donors, with incorporation or reduction of molecular oxygen	MF	7.69212e-05	MF oxidoreductase activity, acting on paired donors, with incorporation or reduction of molecular oxygen
GO:0016899	2.18142e-07	1	5	33	oxidoreductase activity, acting on the CH-OH group of donors, oxygen as acceptor	MF	0.000112527	MF oxidoreductase activity, acting on the CH-OH group of donors, oxygen as acceptor
GO:0008654	2.65866e-07	1	10	322	phospholipid biosynthetic process	BP	0.00013187	BP phospholipid biosynthetic process
GO:0033559	2.93017e-07	1	6	74	unsaturated fatty acid metabolic process	BP	0.000139953	BP unsaturated fatty acid metabolic process
GO:0050993	3.7216e-07	1	4	18	dimethylallyl diphosphate metabolic process	BP	0.000171406	BP dimethylallyl diphosphate metabolic process
GO:0006721	4.77112e-07	1	11	428	terpenoid metabolic process	BP	0.000212167	BP terpenoid metabolic process
GO:0006636	6.04054e-07	1	5	43	unsaturated fatty acid biosynthetic process	BP	0.000258833	BP unsaturated fatty acid biosynthetic process
GO:0042548	6.22196e-07	1	5	53	regulation of photosynthesis, light reaction	BP	0.000258833	BP regulation of photosynthesis, light reaction
GO:0044711	9.27975e-07	1	37	4616	single-organism biosynthetic process	BP	0.000373974	BP single-organism biosynthetic process
GO:0016717	1.19807e-06	1	5	51	oxidoreductase activity, acting on paired donors, with oxidation of a pair of donors resulting in the reduction of molecular oxygen to two molecules of water	MF	0.000468191	MF oxidoreductase activity, acting on paired donors, with oxidation of a pair of donors resulting in the reduction of molecular oxygen to two molecules of water
GO:0046429	1.60692e-06	1	3	6	4-hydroxy-3-methylbut-2-en-1-yl diphosphate synthase activity	MF	0.000609496	MF 4-hydroxy-3-methylbut-2-en-1-yl diphosphate synthase activity
GO:1901576	3.21371e-06	0.999999	61	9782	organic substance biosynthetic process	BP	0.00117679	BP organic substance biosynthetic process
GO:0044281	3.41664e-06	0.999999	38	5096	small molecule metabolic process	BP	0.00117679	BP small molecule metabolic process
GO:0043467	3.41751e-06	1	5	75	regulation of generation of precursor metabolites and energy	BP	0.00117679	BP regulation of generation of precursor metabolites and energy
GO:0010109	3.46758e-06	1	5	71	regulation of photosynthesis	BP	0.00117679	BP regulation of photosynthesis
GO:0006633	3.64607e-06	0.999999	11	557	fatty acid biosynthetic process	BP	0.00120563	BP fatty acid biosynthetic process
GO:0031407	5.22338e-06	1	6	158	oxylipin metabolic process	BP	0.00164294	BP oxylipin metabolic process
GO:0031408	5.22338e-06	1	6	158	oxylipin biosynthetic process	BP	0.00164294	BP oxylipin biosynthetic process
GO:0006644	6.16647e-06	0.999999	11	539	phospholipid metabolic process	BP	0.0018934	BP phospholipid metabolic process
GO:0015020	8.50269e-06	1	5	109	glucuronosyltransferase activity	MF	0.00255002	MF glucuronosyltransferase activity
GO:0052592	8.82991e-06	1	3	10	oxidoreductase activity, acting on CH or CH2 groups, with an iron-sulfur protein as acceptor	MF	0.00258797	MF oxidoreductase activity, acting on CH or CH2 groups, with an iron-sulfur protein as acceptor
GO:0072330	1.1605e-05	0.999998	12	757	monocarboxylic acid biosynthetic process	BP	0.00332574	BP monocarboxylic acid biosynthetic process
GO:0009058	1.31417e-05	0.999994	61	10218	biosynthetic process	BP	0.00368425	BP biosynthetic process
GO:0050992	1.45661e-05	1	3	14	dimethylallyl diphosphate biosynthetic process	BP	0.0039954	BP dimethylallyl diphosphate biosynthetic process
GO:0044249	1.48712e-05	0.999993	58	9562	cellular biosynthetic process	BP	0.0039954	BP cellular biosynthetic process
GO:0042214	1.70436e-05	1	4	40	terpene metabolic process	BP	0.00448561	BP terpene metabolic process
GO:0006631	2.71063e-05	0.999995	12	834	fatty acid metabolic process	BP	0.00699126	BP fatty acid metabolic process
GO:0033386	2.85924e-05	1	2	3	geranylgeranyl diphosphate biosynthetic process	BP	0.00722994	BP geranylgeranyl diphosphate biosynthetic process
GO:0009646	3.16633e-05	0.999999	4	58	response to absence of light	BP	0.00785251	BP response to absence of light
GO:0009536	3.34787e-05	0.999987	30	3710	plastid	CC	0.00814607	CC plastid
GO:0044699	4.06876e-05	0.99998	95	19190	single-organism process	BP	0.00971679	BP single-organism process
GO:0009314	4.6482e-05	0.999988	16	1322	response to radiation	BP	0.0108988	BP response to radiation
GO:0009644	6.4668e-05	0.999996	5	105	response to high light intensity	BP	0.0148921	BP response to high light intensity
GO:0004067	7.13364e-05	1	2	3	asparaginase activity	MF	0.0161395	MF asparaginase activity
GO:0048446	8.28955e-05	1	2	3	petal morphogenesis	BP	0.0184314	BP petal morphogenesis
GO:0050515	8.57902e-05	1	2	3	4-(cytidine 5'-diphospho)-2-C-methyl-D-erythritol kinase activity	MF	0.0187517	MF 4-(cytidine 5'-diphospho)-2-C-methyl-D-erythritol kinase activity
GO:0009416	9.11188e-05	0.999976	15	1258	response to light stimulus	BP	0.0195845	BP response to light stimulus
GO:0030604	0.000106344	1	2	4	1-deoxy-D-xylulose-5-phosphate reductoisomerase activity	MF	0.0224822	MF 1-deoxy-D-xylulose-5-phosphate reductoisomerase activity
GO:0009507	0.000109814	0.999957	28	3575	chloroplast	CC	0.0228413	CC chloroplast
GO:0016053	0.000120281	0.999965	16	1629	organic acid biosynthetic process	BP	0.0242366	BP organic acid biosynthetic process
GO:0046394	0.000120281	0.999965	16	1629	carboxylic acid biosynthetic process	BP	0.0242366	BP carboxylic acid biosynthetic process
GO:0044283	0.000132456	0.999958	18	1968	small molecule biosynthetic process	BP	0.0262793	BP small molecule biosynthetic process
GO:0016109	0.000144419	0.999993	4	69	tetraterpenoid biosynthetic process	BP	0.0277974	BP tetraterpenoid biosynthetic process
GO:0016117	0.000144419	0.999993	4	69	carotenoid biosynthetic process	BP	0.0277974	BP carotenoid biosynthetic process
GO:0046148	0.000240375	0.999966	7	353	pigment biosynthetic process	BP	0.0455865	BP pigment biosynthetic process
GO:0031969	0.000250561	0.999952	9	584	chloroplast membrane	CC	0.0468294	CC chloroplast membrane
GO:0009068	0.000266621	0.999993	3	36	aspartate family amino acid catabolic process	BP	0.0491191	BP aspartate family amino acid catabolic process
GO:0010241	0.000289593	0.999998	2	8	ent-kaurene oxidation to kaurenoic acid	BP	0.0497945	BP ent-kaurene oxidation to kaurenoic acid
GO:0033331	0.000289593	0.999998	2	8	ent-kaurene metabolic process	BP	0.0497945	BP ent-kaurene metabolic process
GO:0052615	0.000289593	0.999998	2	8	ent-kaurene oxidase activity	MF	0.0497945	MF ent-kaurene oxidase activity
GO:0052616	0.000289593	0.999998	2	8	ent-kaur-16-en-19-ol oxidase activity	MF	0.0497945	MF ent-kaur-16-en-19-ol oxidase activity
GO:0052617	0.000289593	0.999998	2	8	ent-kaur-16-en-19-al oxidase activity	MF	0.0497945	MF ent-kaur-16-en-19-al oxidase activity
GO:0016108	0.000317736	0.999981	4	83	tetraterpenoid metabolic process	BP	0.0532146	BP tetraterpenoid metabolic process
GO:0016116	0.000317736	0.999981	4	83	carotenoid metabolic process	BP	0.0532146	BP carotenoid metabolic process
GO:0051745	0.000322084	0.999998	2	6	4-hydroxy-3-methylbut-2-en-1-yl diphosphate reductase activity	MF	0.0532512	MF 4-hydroxy-3-methylbut-2-en-1-yl diphosphate reductase activity
GO:0033384	0.000331472	0.999998	2	8	geranyl diphosphate biosynthetic process	BP	0.0536951	BP geranyl diphosphate biosynthetic process
GO:0033385	0.000333096	0.999998	2	7	geranylgeranyl diphosphate metabolic process	BP	0.0536951	BP geranylgeranyl diphosphate metabolic process
GO:0042170	0.00034499	0.999931	9	608	plastid membrane	CC	0.0549258	CC plastid membrane
GO:0016725	0.000369921	0.999988	3	39	oxidoreductase activity, acting on CH or CH2 groups	MF	0.0581768	MF oxidoreductase activity, acting on CH or CH2 groups
GO:0044434	0.000441358	0.999833	21	2679	chloroplast part	CC	0.0685753	CC chloroplast part
GO:0034009	0.000449393	0.999996	2	12	isoprene synthase activity	MF	0.0689925	MF isoprene synthase activity
GO:0044435	0.000505762	0.999807	21	2711	plastid part	CC	0.076733	CC plastid part
GO:0008798	0.000556546	0.999995	2	9	beta-aspartyl-peptidase activity	MF	0.0827233	MF beta-aspartyl-peptidase activity
GO:0006530	0.000567947	0.999995	2	8	asparagine catabolic process	BP	0.0827233	BP asparagine catabolic process
GO:0033345	0.000567947	0.999995	2	8	asparagine catabolic process via L-aspartate	BP	0.0827233	BP asparagine catabolic process via L-aspartate
GO:0042440	0.000570904	0.999907	7	401	pigment metabolic process	BP	0.0827233	BP pigment metabolic process
GO:0003700	0.000587901	0.999778	20	2242	transcription factor activity, sequence-specific DNA binding	MF	0.0837646	MF transcription factor activity, sequence-specific DNA binding
GO:0001071	0.000591081	0.999777	20	2245	nucleic acid binding transcription factor activity	MF	0.0837646	MF nucleic acid binding transcription factor activity
GO:0009820	0.00062262	0.999956	4	98	alkaloid metabolic process	BP	0.0872751	BP alkaloid metabolic process
GO:0045337	0.00068309	0.999993	2	10	farnesyl diphosphate biosynthetic process	BP	0.0947217	BP farnesyl diphosphate biosynthetic process
GO:0004353	0.0009053	0.999989	2	12	glutamate dehydrogenase [NAD(P)+] activity	MF	0.1242	MF glutamate dehydrogenase [NAD(P)+] activity
GO:0004029	0.00103521	0.999953	3	55	aldehyde dehydrogenase (NAD) activity	MF	0.140527	MF aldehyde dehydrogenase (NAD) activity
GO:0004337	0.00104922	0.999986	2	14	geranyltranstransferase activity	MF	0.140945	MF geranyltranstransferase activity
GO:0033383	0.00120797	0.999982	2	13	geranyl diphosphate metabolic process	BP	0.160597	BP geranyl diphosphate metabolic process
GO:0010378	0.00128413	0.99998	2	17	temperature compensation of the circadian clock	BP	0.168952	BP temperature compensation of the circadian clock
GO:0045338	0.00130078	0.99998	2	13	farnesyl diphosphate metabolic process	BP	0.168952	BP farnesyl diphosphate metabolic process
GO:0004311	0.00131011	0.99998	2	15	farnesyltranstransferase activity	MF	0.168952	MF farnesyltranstransferase activity
GO:0016709	0.00137967	0.999826	5	229	oxidoreductase activity, acting on paired donors, with incorporation or reduction of molecular oxygen, NAD(P)H as one donor, and incorporation of one atom of oxygen	MF	0.17616	MF oxidoreductase activity, acting on paired donors, with incorporation or reduction of molecular oxygen, NAD(P)H as one donor, and incorporation of one atom of oxygen
GO:0016726	0.00143366	0.999977	2	15	oxidoreductase activity, acting on CH or CH2 groups, NAD or NADP as acceptor	MF	0.181258	MF oxidoreductase activity, acting on CH or CH2 groups, NAD or NADP as acceptor
GO:0090407	0.0014477	0.999586	11	1114	organophosphate biosynthetic process	BP	0.181258	BP organophosphate biosynthetic process
GO:0006542	0.00146403	0.999975	2	25	glutamine biosynthetic process	BP	0.18154	BP glutamine biosynthetic process
GO:0048444	0.00173086	0.999969	2	15	floral organ morphogenesis	BP	0.212566	BP floral organ morphogenesis
GO:0010333	0.0017472	0.999904	3	81	terpene synthase activity	MF	0.212566	MF terpene synthase activity
GO:0004356	0.00178355	0.999966	2	26	glutamate-ammonia ligase activity	MF	0.214959	MF glutamate-ammonia ligase activity
GO:0016757	0.00182969	0.999397	13	1514	transferase activity, transferring glycosyl groups	MF	0.218478	MF transferase activity, transferring glycosyl groups
GO:0015114	0.00185832	0.999965	2	23	phosphate ion transmembrane transporter activity	MF	0.219249	MF phosphate ion transmembrane transporter activity
GO:0009509	0.00187015	0.999965	2	16	chromoplast	CC	0.219249	CC chromoplast
GO:0009399	0.00193828	0.999962	2	22	nitrogen fixation	BP	0.22519	BP nitrogen fixation
GO:0070402	0.00197484	0.999962	2	18	NADPH binding	MF	0.227388	MF NADPH binding
GO:0033773	0.00199851	0.999961	2	18	isoflavone 2'-hydroxylase activity	MF	0.228077	MF isoflavone 2'-hydroxylase activity
GO:0048563	0.00207676	0.999959	2	16	post-embryonic organ morphogenesis	BP	0.234929	BP post-embryonic organ morphogenesis
GO:0004161	0.00211059	0.999959	2	15	dimethylallyltranstransferase activity	MF	0.23668	MF dimethylallyltranstransferase activity
GO:0046246	0.0021512	0.999957	2	16	terpene biosynthetic process	BP	0.238416	BP terpene biosynthetic process
GO:0035435	0.00216305	0.999955	2	25	phosphate ion transmembrane transport	BP	0.238416	BP phosphate ion transmembrane transport
GO:0016838	0.00255026	0.999839	3	87	carbon-oxygen lyase activity, acting on phosphates	MF	0.278714	MF carbon-oxygen lyase activity, acting on phosphates
GO:0016211	0.0027568	0.999934	2	31	ammonia ligase activity	MF	0.296264	MF ammonia ligase activity
GO:0016880	0.0027568	0.999934	2	31	acid-ammonia (or amide) ligase activity	MF	0.296264	MF acid-ammonia (or amide) ligase activity
GO:0006355	0.00283171	0.998663	25	3356	regulation of transcription, DNA-templated	BP	0.300687	BP regulation of transcription, DNA-templated
GO:0009877	0.00284459	0.999814	3	72	nodulation	BP	0.300687	BP nodulation
GO:2001141	0.0028821	0.998638	25	3360	regulation of RNA biosynthetic process	BP	0.302175	BP regulation of RNA biosynthetic process
GO:0009753	0.00292036	0.999458	6	381	response to jasmonic acid	BP	0.303718	BP response to jasmonic acid
GO:0016614	0.00297983	0.999266	8	700	oxidoreductase activity, acting on CH-OH group of donors	MF	0.307423	MF oxidoreductase activity, acting on CH-OH group of donors
GO:0008152	0.00303164	0.99822	107	24344	metabolic process	BP	0.310286	BP metabolic process
GO:0051538	0.00319084	0.999919	2	26	3 iron, 4 sulfur cluster binding	MF	0.324008	MF 3 iron, 4 sulfur cluster binding
GO:0007275	0.00332988	0.999082	9	751	multicellular organismal development	BP	0.335485	BP multicellular organismal development
GO:0009570	0.00337725	0.998922	11	1175	chloroplast stroma	CC	0.33762	CC chloroplast stroma
GO:0009532	0.00352273	0.998869	11	1179	plastid stroma	CC	0.349455	CC plastid stroma
GO:0051252	0.00381861	0.998154	25	3431	regulation of RNA metabolic process	BP	0.375914	BP regulation of RNA metabolic process
GO:0009628	0.00426997	0.997946	24	3543	response to abiotic stimulus	BP	0.417164	BP response to abiotic stimulus
GO:1901606	0.00464284	0.999419	4	188	alpha-amino acid catabolic process	BP	0.448139	BP alpha-amino acid catabolic process
GO:0046686	0.00465653	0.998765	8	705	response to cadmium ion	BP	0.448139	BP response to cadmium ion
GO:0050660	0.00505201	0.999138	5	304	flavin adenine dinucleotide binding	MF	0.478826	MF flavin adenine dinucleotide binding
GO:0048578	0.00505773	0.999835	2	33	positive regulation of long-day photoperiodism, flowering	BP	0.478826	BP positive regulation of long-day photoperiodism, flowering
GO:0005783	0.00508678	0.998286	11	1165	endoplasmic reticulum	CC	0.478826	CC endoplasmic reticulum
GO:0005506	0.00557147	0.998336	9	1053	iron ion binding	MF	0.52065	MF iron ion binding
GO:0009579	0.00574603	0.998774	6	435	thylakoid	CC	0.532565	CC thylakoid
GO:0043231	0.00580802	0.996376	80	17046	intracellular membrane-bounded organelle	CC	0.532565	CC intracellular membrane-bounded organelle
GO:0051410	0.00590546	1	1	1	detoxification of nitrogen compound	BP	0.532565	BP detoxification of nitrogen compound
GO:0090471	0.00590546	1	1	1	9,15,9'-tri-cis-zeta-carotene isomerase activity	MF	0.532565	MF 9,15,9'-tri-cis-zeta-carotene isomerase activity
GO:0080132	0.00590546	1	1	1	fatty acid alpha-hydroxylase activity	MF	0.532565	MF fatty acid alpha-hydroxylase activity
GO:0016639	0.00654302	0.999756	2	35	oxidoreductase activity, acting on the CH-NH2 group of donors, NAD or NADP as acceptor	MF	0.583599	MF oxidoreductase activity, acting on the CH-NH2 group of donors, NAD or NADP as acceptor
GO:0043227	0.00656187	0.995879	80	17117	membrane-bounded organelle	CC	0.583599	CC membrane-bounded organelle
GO:0031323	0.00676212	0.996379	30	4611	regulation of cellular metabolic process	BP	0.59729	BP regulation of cellular metabolic process
GO:0009063	0.00697632	0.999019	4	220	cellular amino acid catabolic process	BP	0.612018	BP cellular amino acid catabolic process
GO:0034020	0.00705507	0.999988	1	2	neoxanthin synthase activity	MF	0.614744	MF neoxanthin synthase activity
GO:0016903	0.00772059	0.998881	4	235	oxidoreductase activity, acting on the aldehyde or oxo group of donors	MF	0.668219	MF oxidoreductase activity, acting on the aldehyde or oxo group of donors
GO:0009513	0.00786823	0.999985	1	2	etioplast	CC	0.676458	CC etioplast
GO:0080027	0.00838118	0.999977	1	3	response to herbivore	BP	0.713631	BP response to herbivore
GO:0016160	0.00841128	0.99964	2	44	amylase activity	MF	0.713631	MF amylase activity
GO:2000112	0.00858358	0.995562	25	3690	regulation of cellular macromolecule biosynthetic process	BP	0.723489	BP regulation of cellular macromolecule biosynthetic process
GO:0010556	0.00874892	0.995469	25	3697	regulation of macromolecule biosynthetic process	BP	0.732637	BP regulation of macromolecule biosynthetic process
GO:0051171	0.00902331	0.995258	26	3854	regulation of nitrogen compound metabolic process	BP	0.750739	BP regulation of nitrogen compound metabolic process
GO:0006528	0.00930744	0.999582	2	39	asparagine metabolic process	BP	0.765032	BP asparagine metabolic process
GO:0008194	0.00940854	0.997459	7	695	UDP-glycosyltransferase activity	MF	0.765032	MF UDP-glycosyltransferase activity
GO:0051536	0.00943239	0.998128	5	396	iron-sulfur cluster binding	MF	0.765032	MF iron-sulfur cluster binding
GO:0051540	0.00943239	0.998128	5	396	metal cluster binding	MF	0.765032	MF metal cluster binding
GO:0000287	0.00955658	0.997729	6	519	magnesium ion binding	MF	0.77026	MF magnesium ion binding
GO:0009739	0.00968352	0.998504	4	219	response to gibberellin	BP	0.775644	BP response to gibberellin
GO:0010035	0.0100212	0.995799	14	1880	response to inorganic substance	BP	0.797735	BP response to inorganic substance
GO:0009065	0.0102887	0.999514	2	38	glutamine family amino acid catabolic process	BP	0.809931	BP glutamine family amino acid catabolic process
GO:0048586	0.0103166	0.999509	2	45	regulation of long-day photoperiodism, flowering	BP	0.809931	BP regulation of long-day photoperiodism, flowering
GO:0019222	0.0103628	0.994167	32	5213	regulation of metabolic process	BP	0.809931	BP regulation of metabolic process
GO:0009064	0.0106207	0.998312	4	251	glutamine family amino acid metabolic process	BP	0.824656	BP glutamine family amino acid metabolic process
GO:0009867	0.0107238	0.99886	3	116	jasmonic acid mediated signaling pathway	BP	0.824656	BP jasmonic acid mediated signaling pathway
GO:0050662	0.010743	0.99644	9	1083	coenzyme binding	MF	0.824656	MF coenzyme binding
GO:0004497	0.0113142	0.996833	7	782	monooxygenase activity	MF	0.863363	MF monooxygenase activity
GO:0005983	0.0115578	0.999414	2	50	starch catabolic process	BP	0.86781	BP starch catabolic process
GO:0052727	0.0117011	0.999943	1	6	capsanthin synthase activity	MF	0.86781	MF capsanthin synthase activity
GO:0052728	0.0117011	0.999943	1	6	capsorubin synthase activity	MF	0.86781	MF capsorubin synthase activity
GO:0071395	0.011711	0.998714	3	120	cellular response to jasmonic acid stimulus	BP	0.86781	BP cellular response to jasmonic acid stimulus
GO:0043496	0.0117763	0.999965	1	2	regulation of protein homodimerization activity	BP	0.86781	BP regulation of protein homodimerization activity
GO:0010046	0.0117763	0.999965	1	2	response to mycotoxin	BP	0.86781	BP response to mycotoxin
GO:0010468	0.0118587	0.99362	26	4000	regulation of gene expression	BP	0.868921	BP regulation of gene expression
GO:0043611	0.0122148	0.999944	1	4	isoprene metabolic process	BP	0.88001	BP isoprene metabolic process
GO:0043612	0.0122148	0.999944	1	4	isoprene biosynthetic process	BP	0.88001	BP isoprene biosynthetic process
GO:0071485	0.0122148	0.999944	1	4	cellular response to absence of light	BP	0.88001	BP cellular response to absence of light
GO:0031326	0.0123313	0.99342	25	3806	regulation of cellular biosynthetic process	BP	0.883467	BP regulation of cellular biosynthetic process
GO:0008242	0.012682	0.999324	2	54	omega peptidase activity	MF	0.903577	MF omega peptidase activity
GO:0080150	0.013187	0.999942	1	3	S-adenosyl-L-methionine:benzoic acid carboxyl methyl transferase activity	MF	0.933025	MF S-adenosyl-L-methionine:benzoic acid carboxyl methyl transferase activity
GO:0019219	0.01324	0.99289	25	3785	regulation of nucleobase-containing compound metabolic process	BP	0.933025	BP regulation of nucleobase-containing compound metabolic process
GO:0051409	0.0142479	0.999932	1	3	response to nitrosative stress	BP	0.998595	BP response to nitrosative stress
GO:0071229	0.0145375	0.99531	8	812	cellular response to acid chemical	BP	1	BP cellular response to acid chemical
GO:0009889	0.0146006	0.992091	25	3873	regulation of biosynthetic process	BP	1	BP regulation of biosynthetic process
GO:0006351	0.0151288	0.991979	23	3614	transcription, DNA-templated	BP	1	BP transcription, DNA-templated
GO:2000028	0.0158113	0.999053	2	55	regulation of photoperiodism, flowering	BP	1	BP regulation of photoperiodism, flowering
GO:0019842	0.0176408	0.997735	3	172	vitamin binding	MF	1	MF vitamin binding
GO:0004174	0.0180093	0.999878	1	4	electron-transferring-flavoprotein dehydrogenase activity	MF	1	MF electron-transferring-flavoprotein dehydrogenase activity
GO:0016649	0.0180093	0.999878	1	4	oxidoreductase activity, acting on the CH-NH group of donors, quinone or similar compound as acceptor	MF	1	MF oxidoreductase activity, acting on the CH-NH group of donors, quinone or similar compound as acceptor
GO:0016758	0.0182027	0.99342	9	1225	transferase activity, transferring hexosyl groups	MF	1	MF transferase activity, transferring hexosyl groups
GO:0000024	0.0190102	0.999849	1	6	maltose biosynthetic process	BP	1	BP maltose biosynthetic process
GO:0043229	0.0190159	0.987325	82	18363	intracellular organelle	CC	1	CC intracellular organelle
GO:0009087	0.0193513	0.99985	1	5	methionine catabolic process	BP	1	BP methionine catabolic process
GO:0018826	0.0193513	0.99985	1	5	methionine gamma-lyase activity	MF	1	MF methionine gamma-lyase activity
GO:0019458	0.0193513	0.99985	1	5	methionine catabolic process via 2-oxobutanoate	BP	1	BP methionine catabolic process via 2-oxobutanoate
GO:0080060	0.0199198	0.999851	1	4	integument development	BP	1	BP integument development
GO:0004452	0.0203964	0.999818	1	8	isopentenyl-diphosphate delta-isomerase activity	MF	1	MF isopentenyl-diphosphate delta-isomerase activity
GO:0043226	0.0209688	0.985941	82	18429	organelle	CC	1	CC organelle
GO:0032774	0.0212519	0.98836	23	3732	RNA biosynthetic process	BP	1	BP RNA biosynthetic process
GO:0050589	0.0214977	0.999826	1	4	leucocyanidin oxygenase activity	MF	1	MF leucocyanidin oxygenase activity
GO:0000038	0.0215739	0.998473	2	61	very long-chain fatty acid metabolic process	BP	1	BP very long-chain fatty acid metabolic process
GO:0016835	0.0218037	0.994665	5	484	carbon-oxygen lyase activity	MF	1	MF carbon-oxygen lyase activity
GO:0016620	0.0225305	0.996827	3	181	oxidoreductase activity, acting on the aldehyde or oxo group of donors, NAD or NADP as acceptor	MF	1	MF oxidoreductase activity, acting on the aldehyde or oxo group of donors, NAD or NADP as acceptor
GO:0052624	0.0232717	0.999774	1	6	2-phytyl-1,4-naphthoquinone methyltransferase activity	MF	1	MF 2-phytyl-1,4-naphthoquinone methyltransferase activity
GO:0008940	0.0234147	0.999794	1	4	nitrate reductase activity	MF	1	MF nitrate reductase activity
GO:0010038	0.0237064	0.991638	8	942	response to metal ion	BP	1	BP response to metal ion
GO:0031347	0.0241627	0.993936	5	404	regulation of defense response	BP	1	BP regulation of defense response
GO:0020037	0.0242685	0.992101	7	910	heme binding	MF	1	MF heme binding
GO:0016120	0.0242813	0.999763	1	5	carotene biosynthetic process	BP	1	BP carotene biosynthetic process
GO:1900673	0.0259086	0.99797	2	76	olefin metabolic process	BP	1	BP olefin metabolic process
GO:0000098	0.02614	0.999706	1	7	sulfur amino acid catabolic process	BP	1	BP sulfur amino acid catabolic process
GO:0071852	0.0262536	0.999723	1	5	fungal-type cell wall organization or biogenesis	BP	1	BP fungal-type cell wall organization or biogenesis
GO:0009611	0.0264765	0.993192	5	473	response to wounding	BP	1	BP response to wounding
GO:0052638	0.0265615	0.99969	1	8	indole-3-butyrate beta-glucosyltransferase activity	MF	1	MF indole-3-butyrate beta-glucosyltransferase activity
GO:0010179	0.027523	0.999652	1	12	IAA-Ala conjugate hydrolase activity	MF	1	MF IAA-Ala conjugate hydrolase activity
GO:0080079	0.0277106	0.99967	1	7	cellobiose glucosidase activity	MF	1	MF cellobiose glucosidase activity
GO:0048480	0.0278484	0.999675	1	6	stigma development	BP	1	BP stigma development
GO:0052694	0.0278484	0.999675	1	6	jasmonoyl-isoleucine-12-hydroxylase activity	MF	1	MF jasmonoyl-isoleucine-12-hydroxylase activity
GO:0050897	0.0287547	0.997622	2	69	cobalt ion binding	MF	1	MF cobalt ion binding
GO:0050474	0.0288301	0.999642	1	7	(S)-norcoclaurine synthase activity	MF	1	MF (S)-norcoclaurine synthase activity
GO:0048037	0.0294713	0.987784	10	1521	cofactor binding	MF	1	MF cofactor binding
GO:0060255	0.0301337	0.982362	26	4328	regulation of macromolecule metabolic process	BP	1	BP regulation of macromolecule metabolic process
GO:0004659	0.0303275	0.997419	2	70	prenyltransferase activity	MF	1	MF prenyltransferase activity
GO:0031968	0.0304823	0.995189	3	165	organelle outer membrane	CC	1	CC organelle outer membrane
GO:0030795	0.0305886	0.999573	1	11	jasmonate O-methyltransferase activity	MF	1	MF jasmonate O-methyltransferase activity
GO:0006817	0.0311316	0.997301	2	90	phosphate ion transport	BP	1	BP phosphate ion transport
GO:0004028	0.0311805	0.999581	1	7	3-chloroallyl aldehyde dehydrogenase activity	MF	1	MF 3-chloroallyl aldehyde dehydrogenase activity
GO:0044282	0.0313909	0.991558	5	544	small molecule catabolic process	BP	1	BP small molecule catabolic process
GO:0042312	0.0321561	0.999527	1	11	regulation of vasodilation	BP	1	BP regulation of vasodilation
GO:0045909	0.0321561	0.999527	1	11	positive regulation of vasodilation	BP	1	BP positive regulation of vasodilation
GO:0016021	0.0332193	0.978177	45	9565	integral component of membrane	CC	1	CC integral component of membrane
GO:0033835	0.0335173	0.999515	1	7	flavanone 7-O-glucoside 2''-O-beta-L-rhamnosyltransferase activity	MF	1	MF flavanone 7-O-glucoside 2''-O-beta-L-rhamnosyltransferase activity
GO:0001101	0.0348585	0.98286	14	2214	response to acid chemical	BP	1	BP response to acid chemical
GO:0019637	0.0349887	0.983273	13	2056	organophosphate metabolic process	BP	1	BP organophosphate metabolic process
GO:0009651	0.0356244	0.986429	8	989	response to salt stress	BP	1	BP response to salt stress
GO:0019867	0.0369403	0.993714	3	187	outer membrane	CC	1	CC outer membrane
GO:0009810	0.0372507	0.999359	1	12	stilbene metabolic process	BP	1	BP stilbene metabolic process
GO:0046272	0.0372507	0.999359	1	12	stilbene catabolic process	BP	1	BP stilbene catabolic process
GO:0046906	0.0373625	0.986702	7	1011	tetrapyrrole binding	MF	1	MF tetrapyrrole binding
GO:0016054	0.0378696	0.991164	4	393	organic acid catabolic process	BP	1	BP organic acid catabolic process
GO:0046395	0.0378696	0.991164	4	393	carboxylic acid catabolic process	BP	1	BP carboxylic acid catabolic process
GO:0050502	0.0385175	0.999297	1	17	cis-zeatin O-beta-D-glucosyltransferase activity	MF	1	MF cis-zeatin O-beta-D-glucosyltransferase activity
GO:0033772	0.0393224	0.999273	1	15	flavonoid 3',5'-hydroxylase activity	MF	1	MF flavonoid 3',5'-hydroxylase activity
GO:0043546	0.0400357	0.999273	1	10	molybdopterin cofactor binding	MF	1	MF molybdopterin cofactor binding
GO:0016661	0.0401846	0.999276	1	9	oxidoreductase activity, acting on other nitrogenous compounds as donors	MF	1	MF oxidoreductase activity, acting on other nitrogenous compounds as donors
GO:0043393	0.040358	0.999238	1	14	regulation of protein binding	BP	1	BP regulation of protein binding
GO:0009822	0.0407581	0.999238	1	11	alkaloid catabolic process	BP	1	BP alkaloid catabolic process
GO:1901867	0.0407581	0.999238	1	11	ecgonine methyl ester metabolic process	BP	1	BP ecgonine methyl ester metabolic process
GO:1901868	0.0407581	0.999238	1	11	ecgonine methyl ester catabolic process	BP	1	BP ecgonine methyl ester catabolic process
GO:1901869	0.0407581	0.999238	1	11	ecgonine methyl ester biosynthetic process	BP	1	BP ecgonine methyl ester biosynthetic process
GO:1901870	0.0407581	0.999238	1	11	ecgonone methyl ester metabolic process	BP	1	BP ecgonone methyl ester metabolic process
GO:1901871	0.0407581	0.999238	1	11	ecgonone methyl ester catabolic process	BP	1	BP ecgonone methyl ester catabolic process
GO:1901872	0.0407581	0.999238	1	11	ecgonone methyl ester biosynthetic process	BP	1	BP ecgonone methyl ester biosynthetic process
GO:0005759	0.0410303	0.99272	3	208	mitochondrial matrix	CC	1	CC mitochondrial matrix
GO:0033907	0.0410473	0.999211	1	14	beta-D-fucosidase activity	MF	1	MF beta-D-fucosidase activity
GO:0009084	0.0426004	0.995614	2	106	glutamine family amino acid biosynthetic process	BP	1	BP glutamine family amino acid biosynthetic process
GO:0000023	0.0432059	0.999125	1	14	maltose metabolic process	BP	1	BP maltose metabolic process
GO:0007623	0.0432219	0.992177	3	196	circadian rhythm	BP	1	BP circadian rhythm
GO:0004806	0.043737	0.995446	2	86	triglyceride lipase activity	MF	1	MF triglyceride lipase activity
GO:0052863	0.043802	0.999106	1	13	1-deoxy-D-xylulose 5-phosphate metabolic process	BP	1	BP 1-deoxy-D-xylulose 5-phosphate metabolic process
GO:0052865	0.043802	0.999106	1	13	1-deoxy-D-xylulose 5-phosphate biosynthetic process	BP	1	BP 1-deoxy-D-xylulose 5-phosphate biosynthetic process
GO:0080090	0.0442823	0.973091	26	4498	regulation of primary metabolic process	BP	1	BP regulation of primary metabolic process
GO:0009066	0.0450895	0.99169	3	236	aspartate family amino acid metabolic process	BP	1	BP aspartate family amino acid metabolic process
GO:0004324	0.0458018	0.999028	1	12	ferredoxin-NADP+ reductase activity	MF	1	MF ferredoxin-NADP+ reductase activity
GO:0016731	0.0458018	0.999028	1	12	oxidoreductase activity, acting on iron-sulfur proteins as donors, NAD or NADP as acceptor	MF	1	MF oxidoreductase activity, acting on iron-sulfur proteins as donors, NAD or NADP as acceptor
GO:0009707	0.0473912	0.994844	2	87	chloroplast outer membrane	CC	1	CC chloroplast outer membrane
GO:0004556	0.0479514	0.998921	1	14	alpha-amylase activity	MF	1	MF alpha-amylase activity
GO:0070013	0.0480338	0.987927	4	361	intracellular organelle lumen	CC	1	CC intracellular organelle lumen
GO:0009710	0.0482055	0.998915	1	13	tropane alkaloid biosynthetic process	BP	1	BP tropane alkaloid biosynthetic process
GO:0046448	0.0482055	0.998915	1	13	tropane alkaloid metabolic process	BP	1	BP tropane alkaloid metabolic process
GO:0071484	0.0482215	0.998908	1	14	cellular response to light intensity	BP	1	BP cellular response to light intensity
GO:0050403	0.0483295	0.998879	1	20	trans-zeatin O-beta-D-glucosyltransferase activity	MF	1	MF trans-zeatin O-beta-D-glucosyltransferase activity
GO:1901700	0.0485063	0.973394	17	2969	response to oxygen-containing compound	BP	1	BP response to oxygen-containing compound
GO:0009636	0.0485447	0.990784	3	257	response to toxic substance	BP	1	BP response to toxic substance
GO:0010218	0.0487521	0.9946	2	103	response to far red light	BP	1	BP response to far red light
GO:0051240	0.0489183	0.990698	3	213	positive regulation of multicellular organismal process	BP	1	BP positive regulation of multicellular organismal process
GO:0015643	0.0489963	0.998867	1	15	toxic substance binding	MF	1	MF toxic substance binding
GO:0009527	0.0492738	0.994522	2	89	plastid outer membrane	CC	1	CC plastid outer membrane
GO:0019373	0.0498051	0.998815	1	18	epoxygenase P450 pathway	BP	1	BP epoxygenase P450 pathway

## Sheet: cluster_2
Gene Ontology (GO) annotations for each cluster of differentially expressed genes
numDEInCat - number of differentially expressed genes in the category
numInCat = number of total genes annotated in this category
Ontologies include: Biological Process (BP), Molecular Function (MF), and Cellular Component (CC)
Cluster 10 includes genes up-regulated in linalool+ plants, including transcripts annotated as putative (R)-(-)-linalool synthase
category	over_represented_pvalue	under_represented_pvalue	numDEInCat	numInCat	term	ontology	over_represented_FDR	go_term
GO:0030599	7.00702e-70	1	80	228	pectinesterase activity	MF	9.03625e-66	MF pectinesterase activity
GO:0045490	2.41408e-64	1	75	219	pectin catabolic process	BP	1.5566e-60	BP pectin catabolic process
GO:0045330	4.47181e-60	1	63	162	aspartyl esterase activity	MF	1.92228e-56	MF aspartyl esterase activity
GO:0010393	5.03094e-54	1	80	317	galacturonan metabolic process	BP	1.29758e-50	BP galacturonan metabolic process
GO:0045488	5.03094e-54	1	80	317	pectin metabolic process	BP	1.29758e-50	BP pectin metabolic process
GO:0030234	1.90196e-51	1	110	691	enzyme regulator activity	MF	4.08795e-48	MF enzyme regulator activity
GO:0004857	3.83252e-51	1	78	347	enzyme inhibitor activity	MF	7.06059e-48	MF enzyme inhibitor activity
GO:0042545	5.26727e-45	1	66	281	cell wall modification	BP	8.49084e-42	BP cell wall modification
GO:0052689	1.02879e-43	1	87	530	carboxylic ester hydrolase activity	MF	1.47414e-40	MF carboxylic ester hydrolase activity
GO:0000272	5.25918e-42	1	77	431	polysaccharide catabolic process	BP	6.78224e-39	BP polysaccharide catabolic process
GO:0071555	2.22154e-41	1	72	387	cell wall organization	BP	2.60445e-38	BP cell wall organization
GO:0045229	5.00777e-40	1	78	486	external encapsulating structure organization	BP	5.38168e-37	BP external encapsulating structure organization
GO:0005975	1.0518e-36	1	212	3364	carbohydrate metabolic process	BP	1.04339e-33	BP carbohydrate metabolic process
GO:0005976	1.20495e-35	1	116	1148	polysaccharide metabolic process	BP	1.10993e-32	BP polysaccharide metabolic process
GO:0071554	4.63979e-33	1	76	551	cell wall organization or biogenesis	BP	3.98898e-30	BP cell wall organization or biogenesis
GO:0016052	1.62831e-25	1	83	895	carbohydrate catabolic process	BP	1.31241e-22	BP carbohydrate catabolic process
GO:0005618	4.95962e-25	1	111	1525	cell wall	CC	3.55329e-22	CC cell wall
GO:0030312	4.95962e-25	1	111	1525	external encapsulating structure	CC	3.55329e-22	CC external encapsulating structure
GO:0005576	1.66398e-22	1	153	2653	extracellular region	CC	1.1294e-19	CC extracellular region
GO:0080092	6.76986e-22	1	27	95	regulation of pollen tube growth	BP	4.36521e-19	BP regulation of pollen tube growth
GO:0047911	4.53808e-21	1	17	31	galacturan 1,4-alpha-galacturonidase activity	MF	2.78681e-18	MF galacturan 1,4-alpha-galacturonidase activity
GO:0010769	1.94229e-18	1	27	126	regulation of cell morphogenesis involved in differentiation	BP	1.13854e-15	BP regulation of cell morphogenesis involved in differentiation
GO:0005509	7.73084e-18	1	69	806	calcium ion binding	MF	4.33465e-15	MF calcium ion binding
GO:0051510	8.05838e-17	1	27	133	regulation of unidimensional cell growth	BP	4.33003e-14	BP regulation of unidimensional cell growth
GO:0009860	7.37402e-16	1	29	156	pollen tube growth	BP	3.80382e-13	BP pollen tube growth
GO:0016310	8.66605e-16	1	123	1783	phosphorylation	BP	4.29836e-13	BP phosphorylation
GO:0060284	1.79476e-15	1	28	181	regulation of cell development	BP	8.5723e-13	BP regulation of cell development
GO:0090406	2.39815e-15	1	17	42	pollen tube	CC	1.10452e-12	CC pollen tube
GO:0009932	2.53724e-15	1	33	222	cell tip growth	BP	1.12828e-12	BP cell tip growth
GO:0005083	3.44915e-15	1	28	145	NA	NA	1.47017e-12	none
GO:0006468	3.53407e-15	1	113	1560	protein phosphorylation	BP	1.47017e-12	BP protein phosphorylation
GO:0048588	4.42241e-15	1	35	260	developmental cell growth	BP	1.78223e-12	BP developmental cell growth
GO:0004674	7.70061e-15	1	133	2505	protein serine/threonine kinase activity	MF	3.0093e-12	MF protein serine/threonine kinase activity
GO:0009057	1.52749e-14	1	87	1309	macromolecule catabolic process	BP	5.79369e-12	BP macromolecule catabolic process
GO:0032318	1.80729e-14	1	29	167	NA	NA	6.6591e-12	none
GO:0060560	6.86302e-14	1	48	499	developmental growth involved in morphogenesis	BP	2.45849e-11	BP developmental growth involved in morphogenesis
GO:0004650	7.8992e-14	1	23	128	polygalacturonase activity	MF	2.75319e-11	MF polygalacturonase activity
GO:0016773	2.08221e-13	1	156	3251	phosphotransferase activity, alcohol group as acceptor	MF	7.06635e-11	MF phosphotransferase activity, alcohol group as acceptor
GO:0016043	2.42889e-13	1	190	4071	cellular component organization	BP	8.03153e-11	BP cellular component organization
GO:0004672	2.5163e-13	1	140	2792	protein kinase activity	MF	8.11254e-11	MF protein kinase activity
GO:0005096	2.85314e-13	1	28	169	GTPase activator activity	MF	8.97416e-11	MF GTPase activator activity
GO:0009826	3.73111e-13	1	42	400	unidimensional cell growth	BP	1.14563e-10	BP unidimensional cell growth
GO:0008060	1.10435e-12	1	17	61	NA	NA	3.23675e-10	none
GO:0032312	1.10435e-12	1	17	61	NA	NA	3.23675e-10	none
GO:0030695	1.2879e-12	1	28	179	GTPase regulator activity	MF	3.69085e-10	MF GTPase regulator activity
GO:0033124	2.10795e-12	1	31	220	NA	NA	5.78385e-10	none
GO:0043087	2.10795e-12	1	31	220	regulation of GTPase activity	BP	5.78385e-10	BP regulation of GTPase activity
GO:0016301	4.61507e-12	1	157	3412	kinase activity	MF	1.23992e-09	MF kinase activity
GO:0016049	5.66944e-12	1	51	613	cell growth	BP	1.4921e-09	BP cell growth
GO:0044425	5.87232e-12	1	386	10924	membrane part	CC	1.51459e-09	CC membrane part
GO:1900542	8.98829e-12	1	32	246	regulation of purine nucleotide metabolic process	BP	2.2728e-09	BP regulation of purine nucleotide metabolic process
GO:0060589	9.60261e-12	1	28	195	nucleoside-triphosphatase regulator activity	MF	2.38145e-09	MF nucleoside-triphosphatase regulator activity
GO:0006140	1.01375e-11	1	32	248	regulation of nucleotide metabolic process	BP	2.46666e-09	BP regulation of nucleotide metabolic process
GO:0030811	1.11292e-11	1	31	235	regulation of nucleotide catabolic process	BP	2.6095e-09	BP regulation of nucleotide catabolic process
GO:0033121	1.11292e-11	1	31	235	regulation of purine nucleotide catabolic process	BP	2.6095e-09	BP regulation of purine nucleotide catabolic process
GO:0022604	1.22191e-11	1	29	243	regulation of cell morphogenesis	BP	2.81388e-09	BP regulation of cell morphogenesis
GO:0009118	1.4997e-11	1	31	238	regulation of nucleoside metabolic process	BP	3.3608e-09	BP regulation of nucleoside metabolic process
GO:0048589	1.51153e-11	1	48	587	developmental growth	BP	3.3608e-09	BP developmental growth
GO:0071840	1.69348e-11	1	191	4309	cellular component organization or biogenesis	BP	3.70155e-09	BP cellular component organization or biogenesis
GO:0006813	2.26002e-11	1	28	189	potassium ion transport	BP	4.85753e-09	BP potassium ion transport
GO:0048638	2.71954e-11	1	29	247	regulation of developmental growth	BP	5.74939e-09	BP regulation of developmental growth
GO:0008047	5.85513e-11	1	30	247	enzyme activator activity	MF	1.21787e-08	MF enzyme activator activity
GO:0001558	6.04627e-11	1	27	222	regulation of cell growth	BP	1.23766e-08	BP regulation of cell growth
GO:0006796	8.80963e-11	1	184	4044	phosphate-containing compound metabolic process	BP	1.77514e-08	BP phosphate-containing compound metabolic process
GO:0043900	1.61528e-10	1	29	252	regulation of multi-organism process	BP	3.20472e-08	BP regulation of multi-organism process
GO:0006793	2.20085e-10	1	184	4106	phosphorus metabolic process	BP	4.30033e-08	BP phosphorus metabolic process
GO:0005615	3.33002e-10	1	23	213	extracellular space	CC	6.40954e-08	CC extracellular space
GO:0040007	3.92216e-10	1	54	761	growth	BP	7.43825e-08	BP growth
GO:0015299	4.12938e-10	1	23	158	solute:proton antiporter activity	MF	7.71775e-08	MF solute:proton antiporter activity
GO:0015298	4.31911e-10	1	23	159	solute:cation antiporter activity	MF	7.95703e-08	MF solute:cation antiporter activity
GO:0016021	5.21421e-10	1	336	9565	integral component of membrane	CC	9.47076e-08	CC integral component of membrane
GO:0003779	5.51425e-10	1	20	127	actin binding	MF	9.87664e-08	MF actin binding
GO:0000902	7.65693e-10	1	47	623	cell morphogenesis	BP	1.35265e-07	BP cell morphogenesis
GO:0004553	1.07349e-09	1	61	1123	hydrolase activity, hydrolyzing O-glycosyl compounds	MF	1.87078e-07	MF hydrolase activity, hydrolyzing O-glycosyl compounds
GO:0051336	2.42934e-09	1	33	337	regulation of hydrolase activity	BP	4.17717e-07	BP regulation of hydrolase activity
GO:0055067	2.74729e-09	1	18	104	monovalent inorganic cation homeostasis	BP	4.66171e-07	BP monovalent inorganic cation homeostasis
GO:0043547	3.93278e-09	1	14	65	positive regulation of GTPase activity	BP	6.58664e-07	BP positive regulation of GTPase activity
GO:0006885	4.74244e-09	1	16	84	regulation of pH	BP	7.84084e-07	BP regulation of pH
GO:1901575	5.34875e-09	1	139	3315	organic substance catabolic process	BP	8.73133e-07	BP organic substance catabolic process
GO:0032989	5.45647e-09	1	47	660	cellular component morphogenesis	BP	8.79583e-07	BP cellular component morphogenesis
GO:0040008	6.07492e-09	1	38	475	regulation of growth	BP	9.67188e-07	BP regulation of growth
GO:0005886	6.70913e-09	1	224	5965	plasma membrane	CC	1.05513e-06	CC plasma membrane
GO:0000904	1.13921e-08	1	33	387	cell morphogenesis involved in differentiation	BP	1.77004e-06	BP cell morphogenesis involved in differentiation
GO:0022603	1.99548e-08	1	32	376	regulation of anatomical structure morphogenesis	BP	3.03444e-06	BP regulation of anatomical structure morphogenesis
GO:0016020	2.00006e-08	1	394	11853	membrane	CC	3.03444e-06	CC membrane
GO:0016798	2.31818e-08	1	61	1218	hydrolase activity, acting on glycosyl bonds	MF	3.47618e-06	MF hydrolase activity, acting on glycosyl bonds
GO:0045595	2.71541e-08	1	32	414	regulation of cell differentiation	BP	4.02505e-06	BP regulation of cell differentiation
GO:0051128	3.47482e-08	1	51	803	regulation of cellular component organization	BP	5.09218e-06	BP regulation of cellular component organization
GO:0030570	3.81262e-08	1	11	45	pectate lyase activity	MF	5.52444e-06	MF pectate lyase activity
GO:0016837	4.17428e-08	1	11	46	carbon-oxygen lyase activity, acting on polysaccharides	MF	5.98128e-06	MF carbon-oxygen lyase activity, acting on polysaccharides
GO:0031329	5.46693e-08	1	32	361	regulation of cellular catabolic process	BP	7.74742e-06	BP regulation of cellular catabolic process
GO:0009846	7.06184e-08	1	14	74	pollen germination	BP	9.89886e-06	BP pollen germination
GO:0015077	1.2393e-07	1	43	677	monovalent inorganic cation transmembrane transporter activity	MF	1.7185e-05	MF monovalent inorganic cation transmembrane transporter activity
GO:0015078	1.31764e-07	1	33	451	hydrogen ion transmembrane transporter activity	MF	1.80769e-05	MF hydrogen ion transmembrane transporter activity
GO:0032320	2.06033e-07	1	10	42	NA	NA	2.79685e-05	none
GO:0005507	2.24612e-07	1	33	479	copper ion binding	MF	3.01729e-05	MF copper ion binding
GO:0009056	2.74021e-07	1	143	3685	catabolic process	BP	3.64306e-05	BP catabolic process
GO:0009894	2.85899e-07	1	33	407	regulation of catabolic process	BP	3.7622e-05	BP regulation of catabolic process
GO:0044431	2.93175e-07	1	71	1363	Golgi apparatus part	CC	3.81898e-05	CC Golgi apparatus part
GO:0010198	4.70917e-07	1	5	8	synergid death	BP	6.07294e-05	BP synergid death
GO:0008154	6.65093e-07	1	9	40	actin polymerization or depolymerization	BP	8.49212e-05	BP actin polymerization or depolymerization
GO:0051345	7.93282e-07	1	14	96	positive regulation of hydrolase activity	BP	0.000100296	BP positive regulation of hydrolase activity
GO:0015672	8.19104e-07	1	39	580	monovalent inorganic cation transport	BP	0.000102555	BP monovalent inorganic cation transport
GO:0051258	8.38159e-07	1	14	126	protein polymerization	BP	0.000103932	BP protein polymerization
GO:0044421	8.65502e-07	1	31	486	extracellular region part	CC	0.0001063	CC extracellular region part
GO:0015629	9.63551e-07	1	9	55	actin cytoskeleton	CC	0.000117226	CC actin cytoskeleton
GO:0016324	1.02305e-06	1	13	105	apical plasma membrane	CC	0.000123301	CC apical plasma membrane
GO:0000139	1.10539e-06	1	55	970	Golgi membrane	CC	0.000131991	CC Golgi membrane
GO:0050801	1.14731e-06	1	29	377	ion homeostasis	BP	0.00013574	BP ion homeostasis
GO:0008092	2.04116e-06	0.999999	29	343	cytoskeletal protein binding	MF	0.000239298	MF cytoskeletal protein binding
GO:0030036	3.05361e-06	0.999999	15	128	actin cytoskeleton organization	BP	0.000354769	BP actin cytoskeleton organization
GO:0005200	3.13502e-06	0.999999	13	117	structural constituent of cytoskeleton	MF	0.000360976	MF structural constituent of cytoskeleton
GO:0019220	3.87311e-06	0.999998	37	538	regulation of phosphate metabolic process	BP	0.000434346	BP regulation of phosphate metabolic process
GO:0051174	3.87311e-06	0.999998	37	538	regulation of phosphorus metabolic process	BP	0.000434346	BP regulation of phosphorus metabolic process
GO:0015297	3.87328e-06	0.999999	26	349	antiporter activity	MF	0.000434346	MF antiporter activity
GO:0030042	6.57308e-06	1	7	30	actin filament depolymerization	BP	0.000730745	BP actin filament depolymerization
GO:0043624	8.15941e-06	0.999999	10	58	cellular protein complex disassembly	BP	0.000899348	BP cellular protein complex disassembly
GO:0042995	9.39103e-06	0.999998	18	220	cell projection	CC	0.00102633	CC cell projection
GO:0043241	1.01522e-05	0.999999	10	59	protein complex disassembly	BP	0.00110019	BP protein complex disassembly
GO:0031028	1.2625e-05	1	4	7	septation initiation signaling	BP	0.00134556	BP septation initiation signaling
GO:0031991	1.2625e-05	1	4	7	regulation of actomyosin contractile ring contraction	BP	0.00134556	BP regulation of actomyosin contractile ring contraction
GO:0005856	1.50077e-05	0.999995	25	398	cytoskeleton	CC	0.00158639	CC cytoskeleton
GO:0010973	1.89143e-05	1	4	8	positive regulation of barrier septum assembly	BP	0.001958	BP positive regulation of barrier septum assembly
GO:1901893	1.89143e-05	1	4	8	positive regulation of cell septum assembly	BP	0.001958	BP positive regulation of cell septum assembly
GO:0033949	1.89788e-05	1	4	10	fructan beta-(2,6)-fructosidase activity	MF	0.001958	MF fructan beta-(2,6)-fructosidase activity
GO:0051261	1.9349e-05	0.999998	7	33	protein depolymerization	BP	0.00196897	BP protein depolymerization
GO:0030133	1.93904e-05	0.999998	8	40	transport vesicle	CC	0.00196897	CC transport vesicle
GO:0032984	1.96439e-05	0.999997	10	63	macromolecular complex disassembly	BP	0.00197912	BP macromolecular complex disassembly
GO:0000271	2.27336e-05	0.99999	35	554	polysaccharide biosynthetic process	BP	0.00227266	BP polysaccharide biosynthetic process
GO:0055080	2.41006e-05	0.999992	23	311	cation homeostasis	BP	0.00239078	BP cation homeostasis
GO:1990055	2.84571e-05	0.999999	4	9	phenylacetaldehyde synthase activity	MF	0.00280139	MF phenylacetaldehyde synthase activity
GO:0004565	3.25748e-05	0.999994	12	116	beta-galactosidase activity	MF	0.00318246	MF beta-galactosidase activity
GO:0051753	3.39839e-05	0.999998	6	25	mannan synthase activity	MF	0.00329516	MF mannan synthase activity
GO:0009653	3.44844e-05	0.999982	57	1146	anatomical structure morphogenesis	BP	0.00331874	BP anatomical structure morphogenesis
GO:2000241	3.78054e-05	0.999985	29	440	regulation of reproductive process	BP	0.00361139	BP regulation of reproductive process
GO:0010483	4.2598e-05	0.999998	5	18	pollen tube reception	BP	0.0040393	BP pollen tube reception
GO:0007338	4.34768e-05	0.999996	7	36	single fertilization	BP	0.0040751	BP single fertilization
GO:0048878	4.36076e-05	0.999982	33	561	chemical homeostasis	BP	0.0040751	BP chemical homeostasis
GO:0098590	4.94764e-05	0.999989	13	147	plasma membrane region	CC	0.00456036	CC plasma membrane region
GO:0019187	4.95076e-05	0.999996	6	26	beta-1,4-mannosyltransferase activity	MF	0.00456036	MF beta-1,4-mannosyltransferase activity
GO:0022890	5.01071e-05	0.999975	47	954	inorganic cation transmembrane transporter activity	MF	0.00458284	MF inorganic cation transmembrane transporter activity
GO:0016192	5.07658e-05	0.999975	46	880	vesicle-mediated transport	BP	0.00461039	BP vesicle-mediated transport
GO:0046488	6.01796e-05	0.999983	17	201	phosphatidylinositol metabolic process	BP	0.0054271	BP phosphatidylinositol metabolic process
GO:0034637	6.09213e-05	0.999973	35	605	cellular carbohydrate biosynthetic process	BP	0.00545584	BP cellular carbohydrate biosynthetic process
GO:0010623	6.6106e-05	0.999996	5	19	developmental programmed cell death	BP	0.00587933	BP developmental programmed cell death
GO:0046856	6.97345e-05	0.999991	8	49	phosphatidylinositol dephosphorylation	BP	0.00615956	BP phosphatidylinositol dephosphorylation
GO:0046854	7.32839e-05	0.999989	9	72	phosphatidylinositol phosphorylation	BP	0.0063916	BP phosphatidylinositol phosphorylation
GO:0032319	7.33527e-05	0.999989	9	68	NA	NA	0.0063916	none
GO:0007096	7.39506e-05	0.999998	4	9	regulation of exit from mitosis	BP	0.00640045	BP regulation of exit from mitosis
GO:0004837	8.27904e-05	0.999997	4	12	tyrosine decarboxylase activity	MF	0.00711777	MF tyrosine decarboxylase activity
GO:0016857	8.5016e-05	0.999986	9	71	racemase and epimerase activity, acting on carbohydrates and derivatives	MF	0.0072607	MF racemase and epimerase activity, acting on carbohydrates and derivatives
GO:0022892	0.000105863	0.999934	92	2360	substrate-specific transporter activity	MF	0.00898168	MF substrate-specific transporter activity
GO:0008553	0.000108085	0.999985	8	59	hydrogen-exporting ATPase activity, phosphorylative mechanism	MF	0.00911019	MF hydrogen-exporting ATPase activity, phosphorylative mechanism
GO:0030029	0.000114531	0.999965	17	217	actin filament-based process	BP	0.00959088	BP actin filament-based process
GO:0005085	0.000118899	0.999971	13	139	guanyl-nucleotide exchange factor activity	MF	0.00989241	MF guanyl-nucleotide exchange factor activity
GO:0046834	0.000146832	0.999975	9	78	lipid phosphorylation	BP	0.0121381	BP lipid phosphorylation
GO:0033692	0.000157574	0.999932	30	496	cellular polysaccharide biosynthetic process	BP	0.0129432	BP cellular polysaccharide biosynthetic process
GO:0030258	0.000162243	0.999942	21	353	lipid modification	BP	0.0132423	BP lipid modification
GO:0004445	0.000171159	0.999979	7	42	inositol-polyphosphate 5-phosphatase activity	MF	0.0136251	MF inositol-polyphosphate 5-phosphatase activity
GO:0046030	0.000171159	0.999979	7	42	inositol trisphosphate phosphatase activity	MF	0.0136251	MF inositol trisphosphate phosphatase activity
GO:0052658	0.000171159	0.999979	7	42	inositol-1,4,5-trisphosphate 5-phosphatase activity	MF	0.0136251	MF inositol-1,4,5-trisphosphate 5-phosphatase activity
GO:0052659	0.000171159	0.999979	7	42	inositol-1,3,4,5-tetrakisphosphate 5-phosphatase activity	MF	0.0136251	MF inositol-1,3,4,5-tetrakisphosphate 5-phosphatase activity
GO:0032467	0.000183012	0.999992	4	12	positive regulation of cytokinesis	BP	0.0144793	BP positive regulation of cytokinesis
GO:0006810	0.00020076	0.999854	190	5527	transport	BP	0.0157866	BP transport
GO:0048869	0.000205519	0.999878	69	1559	cellular developmental process	BP	0.0159716	BP cellular developmental process
GO:0006184	0.000206829	0.999954	11	106	NA	NA	0.0159716	none
GO:1901069	0.000206829	0.999954	11	106	guanosine-containing compound catabolic process	BP	0.0159716	BP guanosine-containing compound catabolic process
GO:0052743	0.000213563	0.999972	7	43	inositol tetrakisphosphate phosphatase activity	MF	0.0163935	MF inositol tetrakisphosphate phosphatase activity
GO:0051234	0.000216174	0.999843	192	5602	establishment of localization	BP	0.0164957	BP establishment of localization
GO:0005199	0.000217732	0.999978	6	27	structural constituent of cell wall	MF	0.0165169	MF structural constituent of cell wall
GO:0022411	0.000220676	0.999955	10	82	cellular component disassembly	BP	0.0166423	BP cellular component disassembly
GO:0008324	0.000226589	0.999875	53	1189	cation transmembrane transporter activity	MF	0.0169358	MF cation transmembrane transporter activity
GO:0032954	0.000227194	0.999983	5	20	regulation of cytokinetic process	BP	0.0169358	BP regulation of cytokinetic process
GO:0032955	0.000237688	0.999989	4	13	regulation of barrier septum assembly	BP	0.0175156	BP regulation of barrier septum assembly
GO:1901891	0.000237688	0.999989	4	13	regulation of cell septum assembly	BP	0.0175156	BP regulation of cell septum assembly
GO:0008194	0.000244212	0.999886	33	695	UDP-glycosyltransferase activity	MF	0.0178941	MF UDP-glycosyltransferase activity
GO:0016854	0.000257265	0.999946	10	100	racemase and epimerase activity	MF	0.018744	MF racemase and epimerase activity
GO:0016051	0.000266016	0.999862	43	890	carbohydrate biosynthetic process	BP	0.0192727	BP carbohydrate biosynthetic process
GO:0035091	0.000277154	0.999926	13	131	phosphatidylinositol binding	MF	0.0199675	MF phosphatidylinositol binding
GO:0010337	0.000281301	0.999969	6	34	regulation of salicylic acid metabolic process	BP	0.0201536	BP regulation of salicylic acid metabolic process
GO:0047259	0.000291231	0.999986	4	14	glucomannan 4-beta-mannosyltransferase activity	MF	0.0207498	MF glucomannan 4-beta-mannosyltransferase activity
GO:0022891	0.000310723	0.999804	82	2133	substrate-specific transmembrane transporter activity	MF	0.022017	MF substrate-specific transmembrane transporter activity
GO:0051703	0.000316427	0.999974	5	25	intraspecies interaction between organisms	BP	0.0222986	BP intraspecies interaction between organisms
GO:0032012	0.000322936	0.999963	6	44	regulation of ARF protein signal transduction	BP	0.0226336	BP regulation of ARF protein signal transduction
GO:0004805	0.000384093	0.999966	5	36	trehalose-phosphatase activity	MF	0.0267744	MF trehalose-phosphatase activity
GO:0007265	0.000387991	0.999978	4	17	Ras protein signal transduction	BP	0.0269007	BP Ras protein signal transduction
GO:0048268	0.000429925	0.999964	5	18	clathrin coat assembly	BP	0.0296487	BP clathrin coat assembly
GO:0015925	0.000437965	0.999884	12	153	galactosidase activity	MF	0.0300103	MF galactosidase activity
GO:0046039	0.000440014	0.999892	11	119	GTP metabolic process	BP	0.0300103	BP GTP metabolic process
GO:0046839	0.00044215	0.999922	8	65	phospholipid dephosphorylation	BP	0.0300103	BP phospholipid dephosphorylation
GO:0042578	0.000445316	0.999763	43	913	phosphoric ester hydrolase activity	MF	0.030067	MF phosphoric ester hydrolase activity
GO:0050790	0.000485572	0.999745	41	814	regulation of catalytic activity	BP	0.0325489	BP regulation of catalytic activity
GO:0006650	0.000487123	0.999805	22	362	glycerophospholipid metabolic process	BP	0.0325489	BP glycerophospholipid metabolic process
GO:0046527	0.000501965	0.999793	23	443	glucosyltransferase activity	MF	0.0332107	MF glucosyltransferase activity
GO:0003924	0.000502178	0.999793	23	419	GTPase activity	MF	0.0332107	MF GTPase activity
GO:0035556	0.00050644	0.999757	32	625	intracellular signal transduction	BP	0.0333217	BP intracellular signal transduction
GO:0044723	0.000533556	0.999665	75	1953	single-organism carbohydrate metabolic process	BP	0.0349276	BP single-organism carbohydrate metabolic process
GO:0005794	0.000545762	0.999666	67	1607	Golgi apparatus	CC	0.0355462	CC Golgi apparatus
GO:0090404	0.000565642	0.999967	4	13	pollen tube tip	CC	0.0366559	CC pollen tube tip
GO:0003830	0.00059818	0.999964	4	15	beta-1,4-mannosylglycoprotein 4-beta-N-acetylglucosaminyltransferase activity	MF	0.0383677	MF beta-1,4-mannosylglycoprotein 4-beta-N-acetylglucosaminyltransferase activity
GO:0043085	0.000598397	0.999782	18	265	positive regulation of catalytic activity	BP	0.0383677	BP positive regulation of catalytic activity
GO:1901979	0.000601614	0.999985	3	6	regulation of inward rectifier potassium channel activity	BP	0.0383677	BP regulation of inward rectifier potassium channel activity
GO:0030001	0.000603958	0.999704	33	596	metal ion transport	BP	0.0383677	BP metal ion transport
GO:0004683	0.00064039	0.99994	5	21	calmodulin-dependent protein kinase activity	MF	0.0404827	MF calmodulin-dependent protein kinase activity
GO:0046777	0.000645557	0.99973	23	382	protein autophosphorylation	BP	0.0406102	BP protein autophosphorylation
GO:0007015	0.000655211	0.999831	11	124	actin filament organization	BP	0.0410175	BP actin filament organization
GO:0032561	0.000666903	0.999663	35	779	guanyl ribonucleotide binding	MF	0.0415477	MF guanyl ribonucleotide binding
GO:0010310	0.000675814	0.99991	6	44	regulation of hydrogen peroxide metabolic process	BP	0.0419005	BP regulation of hydrogen peroxide metabolic process
GO:0019001	0.000692832	0.999649	35	780	guanyl nucleotide binding	MF	0.0427501	MF guanyl nucleotide binding
GO:0008653	0.00070053	0.999869	8	56	lipopolysaccharide metabolic process	BP	0.0428153	BP lipopolysaccharide metabolic process
GO:0009103	0.00070053	0.999869	8	56	lipopolysaccharide biosynthetic process	BP	0.0428153	BP lipopolysaccharide biosynthetic process
GO:0015108	0.000708371	0.999906	6	40	chloride transmembrane transporter activity	MF	0.0430903	MF chloride transmembrane transporter activity
GO:0015075	0.000729841	0.999546	68	1726	ion transmembrane transporter activity	MF	0.0439626	MF ion transmembrane transporter activity
GO:0060099	0.000732937	0.999981	3	6	regulation of phagocytosis, engulfment	BP	0.0439626	BP regulation of phagocytosis, engulfment
GO:0060100	0.000732937	0.999981	3	6	positive regulation of phagocytosis, engulfment	BP	0.0439626	BP positive regulation of phagocytosis, engulfment
GO:0051781	0.00077269	0.99992	5	30	positive regulation of cell division	BP	0.0461324	BP positive regulation of cell division
GO:0097502	0.000812157	0.999888	6	44	mannosylation	BP	0.0482654	BP mannosylation
GO:0008963	0.000830082	0.999972	3	9	phospho-N-acetylmuramoyl-pentapeptide-transferase activity	MF	0.0491043	MF phospho-N-acetylmuramoyl-pentapeptide-transferase activity
GO:0006901	0.000842215	0.999916	5	21	vesicle coating	BP	0.0495946	BP vesicle coating
GO:0006817	0.000865689	0.999827	8	90	phosphate ion transport	BP	0.0507451	BP phosphate ion transport
GO:0048610	0.000875221	0.99953	40	844	NA	NA	0.0510717	none
GO:0005545	0.000897495	0.999909	5	22	1-phosphatidylinositol binding	MF	0.0521356	MF 1-phosphatidylinositol binding
GO:0044430	0.00090476	0.999498	44	968	cytoskeletal part	CC	0.0523219	CC cytoskeletal part
GO:0009341	0.000985674	0.999899	5	20	beta-galactosidase complex	CC	0.0567467	CC beta-galactosidase complex
GO:0030135	0.00103382	0.999793	8	62	coated vesicle	CC	0.0592538	CC coated vesicle
GO:0055085	0.00104959	0.999321	76	1871	transmembrane transport	BP	0.0598917	BP transmembrane transport
GO:0032155	0.00108407	0.99992	4	18	cell division site part	CC	0.0615867	CC cell division site part
GO:0032850	0.00110502	0.999959	3	9	NA	NA	0.0622288	none
GO:0032857	0.00110502	0.999959	3	9	NA	NA	0.0622288	none
GO:0065009	0.00115128	0.999353	44	943	regulation of molecular function	BP	0.064552	BP regulation of molecular function
GO:0035838	0.00121057	0.999911	4	15	growing cell tip	CC	0.0673805	CC growing cell tip
GO:0009866	0.00121218	0.999952	3	10	induced systemic resistance, ethylene mediated signaling pathway	BP	0.0673805	BP induced systemic resistance, ethylene mediated signaling pathway
GO:0044448	0.00121811	0.999595	14	191	cell cortex part	CC	0.0674194	CC cell cortex part
GO:0071804	0.00125151	0.999679	10	94	cellular potassium ion transport	BP	0.0686784	BP cellular potassium ion transport
GO:0071805	0.00125151	0.999679	10	94	potassium ion transmembrane transport	BP	0.0686784	BP potassium ion transmembrane transport
GO:0052745	0.00126483	0.999771	7	58	inositol phosphate phosphatase activity	MF	0.0691155	MF inositol phosphate phosphatase activity
GO:0005092	0.00127338	0.999899	4	21	GDP-dissociation inhibitor activity	MF	0.0692891	MF GDP-dissociation inhibitor activity
GO:0045159	0.00128367	0.999904	4	15	myosin II binding	MF	0.0695555	MF myosin II binding
GO:0050378	0.00129285	0.9999	4	18	UDP-glucuronate 4-epimerase activity	MF	0.0697598	MF UDP-glucuronate 4-epimerase activity
GO:0016791	0.00132531	0.999304	35	753	phosphatase activity	MF	0.0712135	MF phosphatase activity
GO:0098589	0.00133338	0.999211	51	1211	membrane region	CC	0.0713499	CC membrane region
GO:0032856	0.00134033	0.999945	3	10	NA	NA	0.0714254	none
GO:0042592	0.00136639	0.999236	42	952	homeostatic process	BP	0.0723528	BP homeostatic process
GO:0005086	0.00136896	0.999789	6	52	ARF guanyl-nucleotide exchange factor activity	MF	0.0723528	MF ARF guanyl-nucleotide exchange factor activity
GO:0032580	0.00138838	0.999668	9	100	Golgi cisterna membrane	CC	0.0730796	CC Golgi cisterna membrane
GO:0030136	0.00144772	0.999735	7	50	clathrin-coated vesicle	CC	0.0758933	CC clathrin-coated vesicle
GO:0000030	0.00151789	0.999761	6	52	mannosyltransferase activity	MF	0.0792497	MF mannosyltransferase activity
GO:0032465	0.00158865	0.999809	5	28	regulation of cytokinesis	BP	0.0826097	BP regulation of cytokinesis
GO:0015291	0.00165428	0.999119	35	775	secondary active transmembrane transporter activity	MF	0.0856771	MF secondary active transmembrane transporter activity
GO:0035251	0.00168617	0.999286	20	402	UDP-glucosyltransferase activity	MF	0.0869128	MF UDP-glucosyltransferase activity
GO:0005094	0.00169162	0.999925	3	10	Rho GDP-dissociation inhibitor activity	MF	0.0869128	MF Rho GDP-dissociation inhibitor activity
GO:0044093	0.00172712	0.999309	18	291	positive regulation of molecular function	BP	0.0883846	BP positive regulation of molecular function
GO:0006811	0.00176838	0.998843	73	1884	ion transport	BP	0.0901382	BP ion transport
GO:0005826	0.00181292	0.999923	3	8	actomyosin contractile ring	CC	0.0916842	CC actomyosin contractile ring
GO:0070938	0.00181292	0.999923	3	8	contractile ring	CC	0.0916842	CC contractile ring
GO:0005100	0.00188555	0.999835	4	20	NA	NA	0.0949845	none
GO:0047213	0.00195267	0.999822	4	25	anthocyanidin 3-O-glucosyltransferase activity	MF	0.0979832	MF anthocyanidin 3-O-glucosyltransferase activity
GO:0009871	0.00204667	0.9999	3	11	jasmonic acid and ethylene-dependent systemic resistance, ethylene mediated signaling pathway	BP	0.102302	BP jasmonic acid and ethylene-dependent systemic resistance, ethylene mediated signaling pathway
GO:0018210	0.00207362	0.999823	4	15	peptidyl-threonine modification	BP	0.103249	BP peptidyl-threonine modification
GO:0016308	0.00210791	0.999644	6	57	1-phosphatidylinositol-4-phosphate 5-kinase activity	MF	0.104552	MF 1-phosphatidylinositol-4-phosphate 5-kinase activity
GO:0010183	0.00216273	0.999565	7	69	pollen tube guidance	BP	0.106861	BP pollen tube guidance
GO:0044262	0.00217102	0.998691	50	1258	cellular carbohydrate metabolic process	BP	0.106861	BP cellular carbohydrate metabolic process
GO:0032321	0.00220608	0.999795	4	22	NA	NA	0.108173	none
GO:0050918	0.00222464	0.99955	7	70	positive chemotaxis	BP	0.10867	BP positive chemotaxis
GO:1901016	0.00228072	0.999891	3	9	regulation of potassium ion transmembrane transporter activity	BP	0.109838	BP regulation of potassium ion transmembrane transporter activity
GO:1901379	0.00228072	0.999891	3	9	regulation of potassium ion transmembrane transport	BP	0.109838	BP regulation of potassium ion transmembrane transport
GO:0016905	0.00229965	0.999901	3	7	myosin heavy chain kinase activity	MF	0.109838	MF myosin heavy chain kinase activity
GO:0031035	0.00229965	0.999901	3	7	myosin filament disassembly	BP	0.109838	BP myosin filament disassembly
GO:0031037	0.00229965	0.999901	3	7	myosin II filament disassembly	BP	0.109838	BP myosin II filament disassembly
GO:0031038	0.00229965	0.999901	3	7	myosin II filament organization	BP	0.109838	BP myosin II filament organization
GO:0005543	0.00239684	0.999072	16	247	phospholipid binding	MF	0.113927	MF phospholipid binding
GO:0016307	0.00240294	0.999507	7	71	phosphatidylinositol phosphate kinase activity	MF	0.113927	MF phosphatidylinositol phosphate kinase activity
GO:0046486	0.00241962	0.998835	25	514	glycerolipid metabolic process	BP	0.114298	BP glycerolipid metabolic process
GO:0043623	0.00242851	0.998967	19	345	cellular protein complex assembly	BP	0.114299	BP cellular protein complex assembly
GO:0050766	0.00246602	0.999868	3	12	positive regulation of phagocytosis	BP	0.115643	BP positive regulation of phagocytosis
GO:0006935	0.0025151	0.999406	8	93	chemotaxis	BP	0.117517	BP chemotaxis
GO:0007010	0.00255542	0.998832	22	383	cytoskeleton organization	BP	0.11897	BP cytoskeleton organization
GO:0019567	0.00258151	0.999974	2	3	arabinose biosynthetic process	BP	0.119752	BP arabinose biosynthetic process
GO:0008289	0.00262986	0.998633	30	636	lipid binding	MF	0.121558	MF lipid binding
GO:0047389	0.00273907	0.99996	2	4	glycerophosphocholine phosphodiesterase activity	MF	0.125646	MF glycerophosphocholine phosphodiesterase activity
GO:0005099	0.00273981	0.999432	7	57	NA	NA	0.125646	none
GO:0046578	0.00274753	0.999508	6	64	regulation of Ras protein signal transduction	BP	0.125646	BP regulation of Ras protein signal transduction
GO:0042330	0.00280947	0.999324	8	94	taxis	BP	0.128024	BP taxis
GO:0006897	0.00281959	0.998888	16	267	endocytosis	BP	0.128033	BP endocytosis
GO:0051056	0.00283543	0.999488	6	65	regulation of small GTPase mediated signal transduction	BP	0.128301	BP regulation of small GTPase mediated signal transduction
GO:0005525	0.00288436	0.998472	31	730	GTP binding	MF	0.130058	MF GTP binding
GO:1901068	0.00293317	0.999082	11	148	guanosine-containing compound metabolic process	BP	0.131798	BP guanosine-containing compound metabolic process
GO:0004564	0.00323601	0.99929	7	100	beta-fructofuranosidase activity	MF	0.1444	MF beta-fructofuranosidase activity
GO:0004575	0.00323601	0.99929	7	100	sucrose alpha-glucosidase activity	MF	0.1444	MF sucrose alpha-glucosidase activity
GO:0044264	0.00327028	0.998199	34	772	cellular polysaccharide metabolic process	BP	0.14519	BP cellular polysaccharide metabolic process
GO:0050764	0.00327623	0.999657	4	24	regulation of phagocytosis	BP	0.14519	BP regulation of phagocytosis
GO:0051553	0.00341343	0.999633	4	27	flavone biosynthetic process	BP	0.149727	BP flavone biosynthetic process
GO:0051554	0.00341343	0.999633	4	27	flavonol metabolic process	BP	0.149727	BP flavonol metabolic process
GO:0051555	0.00341343	0.999633	4	27	flavonol biosynthetic process	BP	0.149727	BP flavonol biosynthetic process
GO:0016758	0.00345742	0.997934	44	1225	transferase activity, transferring hexosyl groups	MF	0.151142	MF transferase activity, transferring hexosyl groups
GO:0015926	0.00351776	0.998531	17	341	glucosidase activity	MF	0.15326	MF glucosidase activity
GO:0051552	0.00359537	0.999607	4	28	flavone metabolic process	BP	0.156114	BP flavone metabolic process
GO:0016788	0.00360857	0.997274	148	4591	hydrolase activity, acting on ester bonds	MF	0.156161	MF hydrolase activity, acting on ester bonds
GO:0046503	0.0038323	0.999573	4	28	glycerolipid catabolic process	BP	0.165289	BP glycerolipid catabolic process
GO:0036442	0.00390289	0.998902	9	128	hydrogen-exporting ATPase activity	MF	0.167772	MF hydrogen-exporting ATPase activity
GO:0022804	0.00402351	0.997483	51	1338	active transmembrane transporter activity	MF	0.172383	MF active transmembrane transporter activity
GO:0046475	0.00420438	0.999903	2	6	glycerophospholipid catabolic process	BP	0.179535	BP glycerophospholipid catabolic process
GO:0003785	0.00435228	0.999703	3	15	actin monomer binding	MF	0.185238	MF actin monomer binding
GO:0098588	0.00442825	0.996698	128	3725	bounding membrane of organelle	CC	0.187851	CC bounding membrane of organelle
GO:0005215	0.00448429	0.996769	101	3000	transporter activity	MF	0.189605	MF transporter activity
GO:0006812	0.00453288	0.997237	45	1059	cation transport	BP	0.190844	BP cation transport
GO:2001257	0.00454321	0.999688	3	14	regulation of cation channel activity	BP	0.190844	BP regulation of cation channel activity
GO:0010021	0.00457888	0.999695	3	12	amylopectin biosynthetic process	BP	0.191098	BP amylopectin biosynthetic process
GO:2000896	0.00457888	0.999695	3	12	amylopectin metabolic process	BP	0.191098	BP amylopectin metabolic process
GO:0017022	0.00470675	0.99946	4	22	myosin binding	MF	0.195801	MF myosin binding
GO:0071822	0.00473912	0.997215	39	920	protein complex subunit organization	BP	0.196513	BP protein complex subunit organization
GO:0050664	0.00480595	0.999215	5	50	oxidoreductase activity, acting on NAD(P)H, oxygen as acceptor	MF	0.198646	MF oxidoreductase activity, acting on NAD(P)H, oxygen as acceptor
GO:0016023	0.00510622	0.997859	16	267	cytoplasmic membrane-bounded vesicle	CC	0.210383	CC cytoplasmic membrane-bounded vesicle
GO:0004430	0.00524558	0.999661	3	9	1-phosphatidylinositol 4-kinase activity	MF	0.215436	MF 1-phosphatidylinositol 4-kinase activity
GO:0009566	0.0055246	0.998667	7	91	fertilization	BP	0.226175	BP fertilization
GO:0030118	0.00555093	0.999077	5	39	clathrin coat	CC	0.226534	CC clathrin coat
GO:0033356	0.0056316	0.999573	3	16	UDP-L-arabinose metabolic process	BP	0.228147	BP UDP-L-arabinose metabolic process
GO:0051274	0.00563783	0.997958	12	198	beta-glucan biosynthetic process	BP	0.228147	BP beta-glucan biosynthetic process
GO:0034702	0.00564352	0.999053	5	42	ion channel complex	CC	0.228147	CC ion channel complex
GO:0009250	0.00572603	0.997493	17	316	glucan biosynthetic process	BP	0.230759	BP glucan biosynthetic process
GO:0044459	0.00587887	0.996664	33	796	plasma membrane part	CC	0.23618	CC plasma membrane part
GO:0005216	0.00591153	0.997648	14	242	ion channel activity	MF	0.236755	MF ion channel activity
GO:0005768	0.00595352	0.996623	33	702	endosome	CC	0.237699	CC endosome
GO:0022857	0.00608856	0.995686	85	2485	transmembrane transporter activity	MF	0.241506	MF transmembrane transporter activity
GO:0006464	0.00610508	0.995332	144	3894	cellular protein modification process	BP	0.241506	BP cellular protein modification process
GO:0036211	0.00610508	0.995332	144	3894	protein modification process	BP	0.241506	BP protein modification process
GO:0072686	0.00613095	0.999538	3	13	mitotic spindle	CC	0.241788	CC mitotic spindle
GO:0016311	0.00620258	0.996936	22	454	dephosphorylation	BP	0.243867	BP dephosphorylation
GO:0006644	0.00629851	0.996729	25	539	phospholipid metabolic process	BP	0.246886	BP phospholipid metabolic process
GO:0003006	0.00632622	0.995568	79	2154	developmental process involved in reproduction	BP	0.247221	BP developmental process involved in reproduction
GO:0032851	0.00644901	0.999523	3	11	NA	NA	0.251258	none
GO:0034707	0.0064827	0.99916	4	29	chloride channel complex	CC	0.251716	CC chloride channel complex
GO:0019322	0.0065287	0.999812	2	6	pentose biosynthetic process	BP	0.251716	BP pentose biosynthetic process
GO:0030002	0.00655836	0.999849	2	4	cellular anion homeostasis	BP	0.251716	BP cellular anion homeostasis
GO:0030643	0.00655836	0.999849	2	4	cellular phosphate ion homeostasis	BP	0.251716	BP cellular phosphate ion homeostasis
GO:0072502	0.00655836	0.999849	2	4	cellular trivalent inorganic anion homeostasis	BP	0.251716	BP cellular trivalent inorganic anion homeostasis
GO:0017048	0.00669419	0.999455	3	17	Rho GTPase binding	MF	0.256167	MF Rho GTPase binding
GO:0005802	0.00673515	0.996436	26	532	trans-Golgi network	CC	0.256972	CC trans-Golgi network
GO:0070382	0.00681948	0.999815	2	5	exocytic vesicle	CC	0.259422	CC exocytic vesicle
GO:0008889	0.00691406	0.999448	3	14	glycerophosphodiester phosphodiesterase activity	MF	0.262246	MF glycerophosphodiester phosphodiesterase activity
GO:0015914	0.00729475	0.999041	4	24	phospholipid transport	BP	0.275874	BP phospholipid transport
GO:0009567	0.00732704	0.99867	5	54	double fertilization forming a zygote and endosperm	BP	0.276285	BP double fertilization forming a zygote and endosperm
GO:0051930	0.00787664	0.999801	2	4	regulation of sensory perception of pain	BP	0.295282	BP regulation of sensory perception of pain
GO:0051931	0.00787664	0.999801	2	4	regulation of sensory perception	BP	0.295282	BP regulation of sensory perception
GO:0005089	0.00812697	0.998498	5	48	Rho guanyl-nucleotide exchange factor activity	MF	0.303784	MF Rho guanyl-nucleotide exchange factor activity
GO:0045298	0.00823441	0.999732	2	6	tubulin complex	CC	0.30691	CC tubulin complex
GO:0008526	0.00839276	0.999291	3	13	phosphatidylinositol transporter activity	MF	0.311911	MF phosphatidylinositol transporter activity
GO:0010215	0.00857618	0.998782	4	33	cellulose microfibril organization	BP	0.317812	BP cellulose microfibril organization
GO:0031410	0.00865854	0.996154	16	285	cytoplasmic vesicle	CC	0.319944	CC cytoplasmic vesicle
GO:0031225	0.00901206	0.995656	19	391	anchored component of membrane	CC	0.332056	CC anchored component of membrane
GO:0044087	0.00975755	0.996201	12	210	regulation of cellular component biogenesis	BP	0.3585	BP regulation of cellular component biogenesis
GO:0005254	0.00997511	0.998523	4	32	chloride channel activity	MF	0.365452	MF chloride channel activity
GO:0051286	0.0102436	0.9985	4	26	cell tip	CC	0.374224	CC cell tip
GO:0010565	0.0105447	0.996815	8	106	regulation of cellular ketone metabolic process	BP	0.384129	BP regulation of cellular ketone metabolic process
GO:0015114	0.0105743	0.998947	3	23	phosphate ion transmembrane transporter activity	MF	0.384129	MF phosphate ion transmembrane transporter activity
GO:0016050	0.0106991	0.997459	6	64	vesicle organization	BP	0.387571	BP vesicle organization
GO:0032541	0.0109072	0.998958	3	15	cortical endoplasmic reticulum	CC	0.394004	CC cortical endoplasmic reticulum
GO:0015662	0.0109714	0.996361	9	140	ATPase activity, coupled to transmembrane movement of ions, phosphorylative mechanism	MF	0.395214	MF ATPase activity, coupled to transmembrane movement of ions, phosphorylative mechanism
GO:0044732	0.0110992	0.998343	4	25	mitotic spindle pole body	CC	0.398705	CC mitotic spindle pole body
GO:0060187	0.011312	0.998283	4	28	cell pole	CC	0.405222	CC cell pole
GO:0033358	0.0127309	0.999402	2	10	UDP-L-arabinose biosynthetic process	BP	0.45353	BP UDP-L-arabinose biosynthetic process
GO:0050373	0.0127309	0.999402	2	10	UDP-arabinose 4-epimerase activity	MF	0.45353	MF UDP-arabinose 4-epimerase activity
GO:0004558	0.012797	0.996346	7	125	alpha-1,4-glucosidase activity	MF	0.45463	MF alpha-1,4-glucosidase activity
GO:0035435	0.013066	0.998583	3	25	phosphate ion transmembrane transport	BP	0.461969	BP phosphate ion transmembrane transport
GO:0005242	0.0130753	0.998629	3	18	inward rectifier potassium channel activity	MF	0.461969	MF inward rectifier potassium channel activity
GO:0010005	0.0131529	0.998687	3	13	cortical microtubule, transverse to long axis	CC	0.463441	CC cortical microtubule, transverse to long axis
GO:0008831	0.0135906	0.997188	5	39	dTDP-4-dehydrorhamnose reductase activity	MF	0.477561	MF dTDP-4-dehydrorhamnose reductase activity
GO:0006487	0.0138059	0.996519	6	71	protein N-linked glycosylation	BP	0.483806	BP protein N-linked glycosylation
GO:0045227	0.0139755	0.999298	2	11	capsule polysaccharide biosynthetic process	BP	0.487103	BP capsule polysaccharide biosynthetic process
GO:0045230	0.0139755	0.999298	2	11	capsule organization	BP	0.487103	BP capsule organization
GO:0007264	0.0141456	0.993955	13	264	small GTPase mediated signal transduction	BP	0.491704	BP small GTPase mediated signal transduction
GO:0005874	0.0142317	0.9923	23	511	microtubule	CC	0.493365	CC microtubule
GO:0090068	0.0144555	0.996325	6	68	positive regulation of cell cycle process	BP	0.498817	BP positive regulation of cell cycle process
GO:0010107	0.0144663	0.997617	4	31	potassium ion import	BP	0.498817	BP potassium ion import
GO:0018107	0.0145162	0.998476	3	14	peptidyl-threonine phosphorylation	BP	0.499203	BP peptidyl-threonine phosphorylation
GO:0070085	0.0147674	0.992842	17	350	glycosylation	BP	0.506489	BP glycosylation
GO:0008643	0.0150419	0.992882	16	313	carbohydrate transport	BP	0.514537	BP carbohydrate transport
GO:0005816	0.0151252	0.997506	4	27	spindle pole body	CC	0.516017	CC spindle pole body
GO:0005088	0.0152599	0.996681	5	55	Ras guanyl-nucleotide exchange factor activity	MF	0.519241	MF Ras guanyl-nucleotide exchange factor activity
GO:0019566	0.0154413	0.999262	2	7	arabinose metabolic process	BP	0.52271	BP arabinose metabolic process
GO:0048046	0.015443	0.990456	35	986	apoplast	CC	0.52271	CC apoplast
GO:0055090	0.0156586	0.999218	2	8	acylglycerol homeostasis	BP	0.525329	BP acylglycerol homeostasis
GO:0070328	0.0156586	0.999218	2	8	triglyceride homeostasis	BP	0.525329	BP triglyceride homeostasis
GO:0010475	0.0156833	0.999216	2	8	galactose-1-phosphate guanylyltransferase (GDP) activity	MF	0.525329	MF galactose-1-phosphate guanylyltransferase (GDP) activity
GO:0080048	0.0156833	0.999216	2	8	GDP-D-glucose phosphorylase activity	MF	0.525329	MF GDP-D-glucose phosphorylase activity
GO:0052742	0.015728	0.998278	3	15	phosphatidylinositol kinase activity	MF	0.52546	MF phosphatidylinositol kinase activity
GO:0051015	0.0157977	0.995888	6	75	actin filament binding	MF	0.526427	MF actin filament binding
GO:0031033	0.0158599	0.998201	3	19	myosin filament organization	BP	0.527137	BP myosin filament organization
GO:0051130	0.0160656	0.992781	14	264	positive regulation of cellular component organization	BP	0.532603	BP positive regulation of cellular component organization
GO:0032889	0.0168977	1	1	1	regulation of vacuole fusion, non-autophagic	BP	0.558752	BP regulation of vacuole fusion, non-autophagic
GO:0045226	0.0174353	0.996111	5	47	extracellular polysaccharide biosynthetic process	BP	0.573736	BP extracellular polysaccharide biosynthetic process
GO:0016787	0.0174633	0.985327	296	10222	hydrolase activity	MF	0.573736	MF hydrolase activity
GO:0009954	0.0174844	0.997911	3	22	proximal/distal pattern formation	BP	0.573736	BP proximal/distal pattern formation
GO:0030775	0.0176248	0.999097	2	7	glucuronoxylan 4-O-methyltransferase activity	MF	0.576875	MF glucuronoxylan 4-O-methyltransferase activity
GO:0005253	0.0181091	0.995877	5	58	anion channel activity	MF	0.591229	MF anion channel activity
GO:0009061	0.0182002	0.998988	2	9	anaerobic respiration	BP	0.5927	BP anaerobic respiration
GO:0006559	0.0186677	0.996608	4	43	L-phenylalanine catabolic process	BP	0.60487	BP L-phenylalanine catabolic process
GO:1902222	0.0186677	0.996608	4	43	erythrose 4-phosphate/phosphoenolpyruvate family amino acid catabolic process	BP	0.60487	BP erythrose 4-phosphate/phosphoenolpyruvate family amino acid catabolic process
GO:0004034	0.0187248	0.999009	2	7	aldose 1-epimerase activity	MF	0.605199	MF aldose 1-epimerase activity
GO:0005905	0.0189644	0.995659	5	51	coated pit	CC	0.61123	CC coated pit
GO:0080037	0.0190403	0.998916	2	9	negative regulation of cytokinin-activated signaling pathway	BP	0.61123	BP negative regulation of cytokinin-activated signaling pathway
GO:0033211	0.0190535	0.998944	2	8	adiponectin-activated signaling pathway	BP	0.61123	BP adiponectin-activated signaling pathway
GO:0015031	0.0192591	0.98653	58	1629	protein transport	BP	0.616291	BP protein transport
GO:0046379	0.0194391	0.995537	5	48	extracellular polysaccharide metabolic process	BP	0.620513	BP extracellular polysaccharide metabolic process
GO:0009816	0.0195945	0.99335	8	129	defense response to bacterium, incompatible interaction	BP	0.623406	BP defense response to bacterium, incompatible interaction
GO:0043933	0.0196264	0.987125	42	1121	macromolecular complex subunit organization	BP	0.623406	BP macromolecular complex subunit organization
GO:0015377	0.019729	0.998926	2	7	cation:chloride symporter activity	MF	0.625122	MF cation:chloride symporter activity
GO:0003824	0.0199282	0.982855	647	24205	catalytic activity	MF	0.629889	MF catalytic activity
GO:0007017	0.0201834	0.989053	21	470	microtubule-based process	BP	0.636395	BP microtubule-based process
GO:0031644	0.0203619	0.998931	2	6	regulation of neurological system process	BP	0.638623	BP regulation of neurological system process
GO:2000124	0.0203798	0.998929	2	6	regulation of endocannabinoid signaling pathway	BP	0.638623	BP regulation of endocannabinoid signaling pathway
GO:0019203	0.020432	0.99516	5	72	carbohydrate phosphatase activity	MF	0.638623	MF carbohydrate phosphatase activity
GO:0022414	0.0204522	0.984839	81	2349	reproductive process	BP	0.638623	BP reproductive process
GO:0009814	0.0208463	0.990305	14	291	defense response, incompatible interaction	BP	0.647915	BP defense response, incompatible interaction
GO:0051239	0.0208502	0.9862	43	1101	regulation of multicellular organismal process	BP	0.647915	BP regulation of multicellular organismal process
GO:0045807	0.0211312	0.997247	3	26	positive regulation of endocytosis	BP	0.655068	BP positive regulation of endocytosis
GO:0010274	0.0221871	0.997143	3	19	hydrotropism	BP	0.686151	BP hydrotropism
GO:0032956	0.0225638	0.99214	8	130	regulation of actin cytoskeleton organization	BP	0.696132	BP regulation of actin cytoskeleton organization
GO:0010366	0.0229493	0.998556	2	9	negative regulation of ethylene biosynthetic process	BP	0.698005	BP negative regulation of ethylene biosynthetic process
GO:0031336	0.0229493	0.998556	2	9	negative regulation of sulfur amino acid metabolic process	BP	0.698005	BP negative regulation of sulfur amino acid metabolic process
GO:0045763	0.0229493	0.998556	2	9	negative regulation of cellular amino acid metabolic process	BP	0.698005	BP negative regulation of cellular amino acid metabolic process
GO:0051175	0.0229493	0.998556	2	9	negative regulation of sulfur metabolic process	BP	0.698005	BP negative regulation of sulfur metabolic process
GO:1900909	0.0229493	0.998556	2	9	negative regulation of olefin metabolic process	BP	0.698005	BP negative regulation of olefin metabolic process
GO:1900912	0.0229493	0.998556	2	9	negative regulation of olefin biosynthetic process	BP	0.698005	BP negative regulation of olefin biosynthetic process
GO:0005548	0.0233272	0.993367	6	78	phospholipid transporter activity	MF	0.707829	MF phospholipid transporter activity
GO:0051273	0.0234028	0.989313	13	262	beta-glucan metabolic process	BP	0.708455	BP beta-glucan metabolic process
GO:0005992	0.02419	0.994036	5	66	trehalose biosynthetic process	BP	0.730573	BP trehalose biosynthetic process
GO:0030427	0.0250768	0.995062	4	37	site of polarized growth	CC	0.755386	CC site of polarized growth
GO:0071366	0.0252389	0.998294	2	10	cellular response to indolebutyric acid stimulus	BP	0.755386	BP cellular response to indolebutyric acid stimulus
GO:0080026	0.0252389	0.998294	2	10	response to indolebutyric acid	BP	0.755386	BP response to indolebutyric acid
GO:0047262	0.0252459	0.993762	5	54	polygalacturonate 4-alpha-galacturonosyltransferase activity	MF	0.755386	MF polygalacturonate 4-alpha-galacturonosyltransferase activity
GO:0048317	0.0254844	0.998409	2	7	seed morphogenesis	BP	0.759989	BP seed morphogenesis
GO:0016298	0.0255176	0.987829	14	278	lipase activity	MF	0.759989	MF lipase activity
GO:0005249	0.0258175	0.993562	5	58	voltage-gated potassium channel activity	MF	0.765608	MF voltage-gated potassium channel activity
GO:0023014	0.025825	0.990797	8	119	signal transduction by protein phosphorylation	BP	0.765608	BP signal transduction by protein phosphorylation
GO:0002793	0.0262029	0.998163	2	11	positive regulation of peptide secretion	BP	0.769733	BP positive regulation of peptide secretion
GO:0032024	0.0262029	0.998163	2	11	positive regulation of insulin secretion	BP	0.769733	BP positive regulation of insulin secretion
GO:0046887	0.0262029	0.998163	2	11	positive regulation of hormone secretion	BP	0.769733	BP positive regulation of hormone secretion
GO:0090277	0.0262029	0.998163	2	11	positive regulation of peptide hormone secretion	BP	0.769733	BP positive regulation of peptide hormone secretion
GO:0016042	0.0265008	0.984771	23	624	lipid catabolic process	BP	0.776714	BP lipid catabolic process
GO:0022838	0.0276717	0.986639	14	311	substrate-specific channel activity	MF	0.808854	MF substrate-specific channel activity
GO:0045184	0.0277228	0.980203	58	1665	establishment of protein localization	BP	0.808854	BP establishment of protein localization
GO:0048767	0.0278935	0.991686	6	95	root hair elongation	BP	0.811998	BP root hair elongation
GO:0060292	0.028474	0.998112	2	7	long term synaptic depression	BP	0.826538	BP long term synaptic depression
GO:0051992	0.0285287	0.999794	1	2	UDP-N-acetylmuramoyl-L-alanyl-D-glutamyl-meso-2,6-diaminopimelyl-D-alanyl-D-alanine:undecaprenyl-phosphate transferase activity	MF	0.826538	MF UDP-N-acetylmuramoyl-L-alanyl-D-glutamyl-meso-2,6-diaminopimelyl-D-alanyl-D-alanine:undecaprenyl-phosphate transferase activity
GO:0015198	0.0285853	0.992597	5	78	oligopeptide transporter activity	MF	0.826538	MF oligopeptide transporter activity
GO:0043266	0.0291534	0.995734	3	24	regulation of potassium ion transport	BP	0.84108	BP regulation of potassium ion transport
GO:0009664	0.0298264	0.989926	7	119	plant-type cell wall organization	BP	0.858574	BP plant-type cell wall organization
GO:0015079	0.0300223	0.987493	10	175	potassium ion transmembrane transporter activity	MF	0.86229	MF potassium ion transmembrane transporter activity
GO:0071782	0.0305871	0.995476	3	22	endoplasmic reticulum tubular network	CC	0.87656	CC endoplasmic reticulum tubular network
GO:0032970	0.0308369	0.988599	8	136	regulation of actin filament-based process	BP	0.87999	BP regulation of actin filament-based process
GO:0005267	0.0308433	0.990639	6	81	potassium channel activity	MF	0.87999	MF potassium channel activity
GO:0043412	0.0311177	0.974829	145	4133	macromolecule modification	BP	0.885857	BP macromolecule modification
GO:0000151	0.0316752	0.981764	22	473	ubiquitin ligase complex	CC	0.898168	CC ubiquitin ligase complex
GO:0044702	0.0316894	0.976659	67	1931	single organism reproductive process	BP	0.898168	BP single organism reproductive process
GO:0030244	0.0318762	0.988112	8	152	cellulose biosynthetic process	BP	0.901482	BP cellulose biosynthetic process
GO:0005991	0.0319773	0.991479	5	76	trehalose metabolic process	BP	0.90236	BP trehalose metabolic process
GO:0006821	0.0320544	0.995194	3	21	chloride transport	BP	0.902563	BP chloride transport
GO:0015197	0.0322186	0.991384	5	80	peptide transporter activity	MF	0.905211	MF peptide transporter activity
GO:0048167	0.0325098	0.997533	2	9	regulation of synaptic plasticity	BP	0.911406	BP regulation of synaptic plasticity
GO:0019829	0.0327694	0.983813	14	321	cation-transporting ATPase activity	MF	0.913349	MF cation-transporting ATPase activity
GO:0042625	0.0327694	0.983813	14	321	ATPase activity, coupled to transmembrane movement of ions	MF	0.913349	MF ATPase activity, coupled to transmembrane movement of ions
GO:0033239	0.0327916	0.997405	2	11	negative regulation of cellular amine metabolic process	BP	0.913349	BP negative regulation of cellular amine metabolic process
GO:0030833	0.0342946	0.988083	7	116	regulation of actin filament polymerization	BP	0.953153	BP regulation of actin filament polymerization
GO:0051020	0.0346368	0.989172	6	88	GTPase binding	MF	0.958802	MF GTPase binding
GO:0005484	0.0346465	0.994455	3	33	SNAP receptor activity	MF	0.958802	MF SNAP receptor activity
GO:0030838	0.0353832	0.992212	4	40	positive regulation of actin filament polymerization	BP	0.973519	BP positive regulation of actin filament polymerization
GO:0032273	0.0353832	0.992212	4	40	positive regulation of protein polymerization	BP	0.973519	BP positive regulation of protein polymerization
GO:0055028	0.0354048	0.99223	4	38	cortical microtubule	CC	0.973519	CC cortical microtubule
GO:0030553	0.0358146	0.99202	4	47	cGMP binding	MF	0.982693	MF cGMP binding
GO:0072583	0.0361195	0.994159	3	30	clathrin-mediated endocytosis	BP	0.988953	BP clathrin-mediated endocytosis
GO:0005244	0.0363425	0.987234	7	110	voltage-gated ion channel activity	MF	0.990853	MF voltage-gated ion channel activity
GO:0022832	0.0363425	0.987234	7	110	voltage-gated channel activity	MF	0.990853	MF voltage-gated channel activity
GO:2000377	0.0364892	0.988441	6	91	regulation of reactive oxygen species metabolic process	BP	0.991999	BP regulation of reactive oxygen species metabolic process
GO:0016757	0.0365384	0.974317	48	1514	transferase activity, transferring glycosyl groups	MF	0.991999	MF transferase activity, transferring glycosyl groups
GO:0008064	0.0367274	0.987047	7	118	regulation of actin polymerization or depolymerization	BP	0.992948	BP regulation of actin polymerization or depolymerization
GO:0030832	0.0367274	0.987047	7	118	regulation of actin filament length	BP	0.992948	BP regulation of actin filament length
GO:0048016	0.0377229	0.993825	3	28	inositol phosphate-mediated signaling	BP	1	BP inositol phosphate-mediated signaling
GO:0032271	0.0379942	0.986501	7	119	regulation of protein polymerization	BP	1	BP regulation of protein polymerization
GO:0009201	0.038516	0.983211	10	219	ribonucleoside triphosphate biosynthetic process	BP	1	BP ribonucleoside triphosphate biosynthetic process
GO:0004702	0.0388187	0.983994	9	159	receptor signaling protein serine/threonine kinase activity	MF	1	MF receptor signaling protein serine/threonine kinase activity
GO:0005815	0.0395612	0.982759	10	169	microtubule organizing center	CC	1	CC microtubule organizing center
GO:0015698	0.0400598	0.980253	13	300	inorganic anion transport	BP	1	BP inorganic anion transport
GO:0009627	0.0412067	0.988255	5	76	systemic acquired resistance	BP	1	BP systemic acquired resistance
GO:0033926	0.0412882	0.993057	3	25	glycopeptide alpha-N-acetylgalactosaminidase activity	MF	1	MF glycopeptide alpha-N-acetylgalactosaminidase activity
GO:0033956	0.0419246	0.999552	1	2	beta-apiosyl-beta-glucosidase activity	MF	1	MF beta-apiosyl-beta-glucosidase activity
GO:0008545	0.0423209	1	1	1	JUN kinase kinase activity	MF	1	MF JUN kinase kinase activity
GO:0061029	0.0423209	1	1	1	eyelid development in camera-type eye	BP	1	BP eyelid development in camera-type eye
GO:0008363	0.0423321	1	1	1	larval chitin-based cuticle development	BP	1	BP larval chitin-based cuticle development
GO:0018243	0.0423321	1	1	1	protein O-linked glycosylation via threonine	BP	1	BP protein O-linked glycosylation via threonine
GO:0042337	0.0423321	1	1	1	cuticle development involved in chitin-based cuticle molting cycle	BP	1	BP cuticle development involved in chitin-based cuticle molting cycle
GO:0042759	0.0423321	1	1	1	long-chain fatty acid biosynthetic process	BP	1	BP long-chain fatty acid biosynthetic process
GO:0097363	0.0423321	1	1	1	protein O-GlcNAc transferase activity	MF	1	MF protein O-GlcNAc transferase activity
GO:0097370	0.0423321	1	1	1	protein O-GlcNAcylation via threonine	BP	1	BP protein O-GlcNAcylation via threonine
GO:0031254	0.0423321	1	1	1	cell trailing edge	CC	1	CC cell trailing edge
GO:0031272	0.0423321	1	1	1	regulation of pseudopodium assembly	BP	1	BP regulation of pseudopodium assembly
GO:0036051	0.0423321	1	1	1	protein localization to trailing edge	BP	1	BP protein localization to trailing edge
GO:0050919	0.0423321	1	1	1	negative chemotaxis	BP	1	BP negative chemotaxis
GO:0005987	0.0425314	0.992741	3	26	sucrose catabolic process	BP	1	BP sucrose catabolic process
GO:0030100	0.0426582	0.989928	4	50	regulation of endocytosis	BP	1	BP regulation of endocytosis
GO:0030552	0.0432823	0.989743	4	49	cAMP binding	MF	1	MF cAMP binding
GO:0022843	0.043387	0.987501	5	69	voltage-gated cation channel activity	MF	1	MF voltage-gated cation channel activity
GO:0031012	0.043906	0.987269	5	76	extracellular matrix	CC	1	CC extracellular matrix
GO:0003962	0.0443679	0.995537	2	22	cystathionine gamma-synthase activity	MF	1	MF cystathionine gamma-synthase activity
GO:0050793	0.0445409	0.968299	48	1295	regulation of developmental process	BP	1	BP regulation of developmental process
GO:1902476	0.0450171	0.995709	2	12	chloride transmembrane transport	BP	1	BP chloride transmembrane transport
GO:1902495	0.0455773	0.986668	5	73	transmembrane transporter complex	CC	1	CC transmembrane transporter complex
GO:1990351	0.0455773	0.986668	5	73	transporter complex	CC	1	CC transporter complex
GO:0032957	0.0462218	0.988805	4	50	inositol trisphosphate metabolic process	BP	1	BP inositol trisphosphate metabolic process
GO:0015267	0.0467515	0.975757	14	329	channel activity	MF	1	MF channel activity
GO:0022803	0.0467515	0.975757	14	329	passive transmembrane transporter activity	MF	1	MF passive transmembrane transporter activity
GO:0009556	0.0471651	0.988546	4	46	microsporogenesis	BP	1	BP microsporogenesis
GO:0010053	0.0472546	0.98408	6	92	root epidermal cell differentiation	BP	1	BP root epidermal cell differentiation
GO:0006012	0.0477387	0.988178	4	69	galactose metabolic process	BP	1	BP galactose metabolic process
GO:0030551	0.0486565	0.98801	4	51	cyclic nucleotide binding	MF	1	MF cyclic nucleotide binding
GO:0003993	0.049041	0.983315	6	95	acid phosphatase activity	MF	1	MF acid phosphatase activity
GO:0009074	0.0492617	0.987775	4	55	aromatic amino acid family catabolic process	BP	1	BP aromatic amino acid family catabolic process
GO:0090333	0.0496208	0.987752	4	46	regulation of stomatal closure	BP	1	BP regulation of stomatal closure

## Sheet: cluster_3
Gene Ontology (GO) annotations for each cluster of differentially expressed genes
numDEInCat - number of differentially expressed genes in the category
numInCat = number of total genes annotated in this category
Ontologies include: Biological Process (BP), Molecular Function (MF), and Cellular Component (CC)
Cluster 10 includes genes up-regulated in linalool+ plants, including transcripts annotated as putative (R)-(-)-linalool synthase
category	over_represented_pvalue	under_represented_pvalue	numDEInCat	numInCat	term	ontology	over_represented_FDR	go_term
GO:0044435	7.27392e-74	1	287	2711	plastid part	CC	7.57815e-70	CC plastid part
GO:0044434	1.17527e-73	1	285	2679	chloroplast part	CC	7.57815e-70	CC chloroplast part
GO:0009579	6.46329e-66	1	113	435	thylakoid	CC	2.77835e-62	CC thylakoid
GO:0044436	1.58785e-56	1	138	899	thylakoid part	CC	5.11924e-53	CC thylakoid part
GO:0009507	7.17033e-55	1	310	3575	chloroplast	CC	1.84937e-51	CC chloroplast
GO:0009536	8.75196e-53	1	313	3710	plastid	CC	1.88109e-49	CC plastid
GO:0034357	2.29804e-52	1	127	826	photosynthetic membrane	CC	3.70444e-49	CC photosynthetic membrane
GO:0042651	2.29804e-52	1	127	826	thylakoid membrane	CC	3.70444e-49	CC thylakoid membrane
GO:0009535	9.13107e-51	1	124	816	chloroplast thylakoid membrane	CC	1.2423e-47	CC chloroplast thylakoid membrane
GO:0055035	9.63326e-51	1	124	817	plastid thylakoid membrane	CC	1.2423e-47	CC plastid thylakoid membrane
GO:0009570	8.20239e-48	1	152	1175	chloroplast stroma	CC	9.61618e-45	CC chloroplast stroma
GO:0009534	1.16202e-47	1	76	262	chloroplast thylakoid	CC	1.15272e-44	CC chloroplast thylakoid
GO:0031976	1.16202e-47	1	76	262	plastid thylakoid	CC	1.15272e-44	CC plastid thylakoid
GO:0009532	1.64156e-47	1	152	1179	plastid stroma	CC	1.51211e-44	CC plastid stroma
GO:0031984	1.53246e-45	1	76	278	organelle subcompartment	CC	1.31751e-42	CC organelle subcompartment
GO:0009941	1.6166e-42	1	117	745	chloroplast envelope	CC	1.30298e-39	CC chloroplast envelope
GO:0009526	9.33161e-42	1	117	759	plastid envelope	CC	7.07885e-39	CC plastid envelope
GO:0009521	1.35433e-40	1	54	170	photosystem	CC	9.70305e-38	CC photosystem
GO:0005576	6.87596e-38	1	217	2653	extracellular region	CC	4.66697e-35	CC extracellular region
GO:0031967	1.88015e-36	1	118	868	organelle envelope	CC	1.15459e-33	CC organelle envelope
GO:0031975	1.88015e-36	1	118	868	envelope	CC	1.15459e-33	CC envelope
GO:0009523	5.81302e-32	1	40	113	photosystem II	CC	3.40749e-29	CC photosystem II
GO:0015979	1.11206e-31	1	57	252	photosynthesis	BP	6.23525e-29	BP photosynthesis
GO:0009522	1.15628e-28	1	34	93	photosystem I	CC	6.21307e-26	CC photosystem I
GO:0009765	5.97992e-27	1	24	38	photosynthesis, light harvesting	BP	3.08468e-24	BP photosynthesis, light harvesting
GO:0048046	6.91846e-25	1	99	986	apoplast	CC	3.43155e-22	CC apoplast
GO:0005840	3.6444e-22	1	87	840	ribosome	CC	1.74067e-19	CC ribosome
GO:0008150	1.78763e-21	1	1268	33631	biological_process	BP	8.23332e-19	BP biological_process
GO:0010319	3.35939e-21	1	27	84	stromule	CC	1.49389e-18	CC stromule
GO:0016168	3.31593e-20	1	26	93	chlorophyll binding	MF	1.42541e-17	MF chlorophyll binding
GO:0008152	2.03706e-19	1	993	24344	metabolic process	BP	8.47416e-17	BP metabolic process
GO:0019253	2.65094e-19	1	25	76	reductive pentose-phosphate cycle	BP	1.03595e-16	BP reductive pentose-phosphate cycle
GO:0019685	2.65094e-19	1	25	76	photosynthesis, dark reaction	BP	1.03595e-16	BP photosynthesis, dark reaction
GO:0006412	3.23261e-18	1	78	855	translation	BP	1.22611e-15	BP translation
GO:0055114	1.59248e-17	1	165	2231	oxidation-reduction process	BP	5.8676e-15	BP oxidation-reduction process
GO:0003735	3.2031e-17	1	74	832	structural constituent of ribosome	MF	1.14742e-14	MF structural constituent of ribosome
GO:0047100	9.19407e-16	1	12	19	glyceraldehyde-3-phosphate dehydrogenase (NADP+) (phosphorylating) activity	MF	3.20451e-13	MF glyceraldehyde-3-phosphate dehydrogenase (NADP+) (phosphorylating) activity
GO:0042440	2.01176e-15	1	49	401	pigment metabolic process	BP	6.82728e-13	BP pigment metabolic process
GO:0005575	3.90655e-15	1	1244	33977	cellular_component	CC	1.29177e-12	CC cellular_component
GO:0046148	1.45506e-14	1	44	353	pigment biosynthetic process	BP	4.69113e-12	BP pigment biosynthetic process
GO:0009543	3.36001e-14	1	22	82	chloroplast thylakoid lumen	CC	1.00935e-11	CC chloroplast thylakoid lumen
GO:0031978	3.36001e-14	1	22	82	plastid thylakoid lumen	CC	1.00935e-11	CC plastid thylakoid lumen
GO:0031977	3.36554e-14	1	26	126	thylakoid lumen	CC	1.00935e-11	CC thylakoid lumen
GO:0018298	3.87395e-14	1	28	156	protein-chromophore linkage	BP	1.12914e-11	BP protein-chromophore linkage
GO:0030529	3.94009e-14	1	114	1695	ribonucleoprotein complex	CC	1.12914e-11	CC ribonucleoprotein complex
GO:0004553	5.68919e-14	1	83	1123	hydrolase activity, hydrolyzing O-glycosyl compounds	MF	1.59495e-11	MF hydrolase activity, hydrolyzing O-glycosyl compounds
GO:0016798	1.206e-13	1	87	1218	hydrolase activity, acting on glycosyl bonds	MF	3.30906e-11	MF hydrolase activity, acting on glycosyl bonds
GO:0005198	7.48329e-13	1	83	1180	structural molecule activity	MF	2.01051e-10	MF structural molecule activity
GO:0015995	9.27172e-12	1	21	92	chlorophyll biosynthetic process	BP	2.44016e-09	BP chlorophyll biosynthetic process
GO:0006091	1.07316e-11	1	55	651	generation of precursor metabolites and energy	BP	2.76789e-09	BP generation of precursor metabolites and energy
GO:0022626	1.86416e-11	1	35	305	cytosolic ribosome	CC	4.71377e-09	CC cytosolic ribosome
GO:0005975	1.95643e-11	1	177	3364	carbohydrate metabolic process	BP	4.85195e-09	BP carbohydrate metabolic process
GO:0000272	2.01582e-11	1	44	431	polysaccharide catabolic process	BP	4.9049e-09	BP polysaccharide catabolic process
GO:0016020	4.16328e-11	1	511	11853	membrane	CC	9.94254e-09	CC membrane
GO:0019843	4.43206e-11	1	32	259	rRNA binding	MF	1.0392e-08	MF rRNA binding
GO:0044444	1.44013e-10	1	668	16772	cytoplasmic part	CC	3.3164e-08	CC cytoplasmic part
GO:0046906	1.61628e-10	1	67	1011	tetrapyrrole binding	MF	3.57232e-08	MF tetrapyrrole binding
GO:0005618	1.63436e-10	1	94	1525	cell wall	CC	3.57232e-08	CC cell wall
GO:0030312	1.63436e-10	1	94	1525	external encapsulating structure	CC	3.57232e-08	CC external encapsulating structure
GO:0010287	2.21128e-10	1	24	148	plastoglobule	CC	4.68372e-08	CC plastoglobule
GO:0016491	2.21547e-10	1	192	4030	oxidoreductase activity	MF	4.68372e-08	MF oxidoreductase activity
GO:1901576	2.29177e-10	1	427	9782	organic substance biosynthetic process	BP	4.76688e-08	BP organic substance biosynthetic process
GO:0009058	2.63501e-10	1	442	10218	biosynthetic process	BP	5.39383e-08	BP biosynthetic process
GO:0009654	3.37646e-10	1	12	32	photosystem II oxygen evolving complex	CC	6.80357e-08	CC photosystem II oxygen evolving complex
GO:0006869	6.38086e-10	1	31	247	lipid transport	BP	1.26596e-07	BP lipid transport
GO:0030245	7.16189e-10	1	16	64	cellulose catabolic process	BP	1.39939e-07	BP cellulose catabolic process
GO:0006779	9.10091e-10	1	22	142	porphyrin-containing compound biosynthetic process	BP	1.75172e-07	BP porphyrin-containing compound biosynthetic process
GO:0051275	1.02557e-09	1	16	65	beta-glucan catabolic process	BP	1.94496e-07	BP beta-glucan catabolic process
GO:0071704	1.07547e-09	1	860	22013	organic substance metabolic process	BP	2.01004e-07	BP organic substance metabolic process
GO:0044446	1.13593e-09	1	473	10905	intracellular organelle part	CC	2.0927e-07	CC intracellular organelle part
GO:0044422	1.4286e-09	1	475	10981	organelle part	CC	2.59482e-07	CC organelle part
GO:0044710	1.69853e-09	1	444	10476	single-organism metabolic process	BP	3.04225e-07	BP single-organism metabolic process
GO:0009251	1.85711e-09	1	21	124	glucan catabolic process	BP	3.28072e-07	BP glucan catabolic process
GO:0008810	3.2742e-09	1	15	62	cellulase activity	MF	5.70596e-07	MF cellulase activity
GO:0033014	3.9388e-09	1	22	151	tetrapyrrole biosynthetic process	BP	6.77263e-07	BP tetrapyrrole biosynthetic process
GO:0044711	4.01145e-09	1	216	4616	single-organism biosynthetic process	BP	6.8068e-07	BP single-organism biosynthetic process
GO:0009409	4.11015e-09	1	55	683	response to cold	BP	6.8837e-07	BP response to cold
GO:0044391	4.18519e-09	1	38	463	ribosomal subunit	CC	6.91951e-07	CC ribosomal subunit
GO:0009505	4.91445e-09	1	39	415	plant-type cell wall	CC	7.99847e-07	CC plant-type cell wall
GO:0044445	4.96183e-09	1	45	583	cytosolic part	CC	7.99847e-07	CC cytosolic part
GO:0015994	5.76574e-09	1	22	133	chlorophyll metabolic process	BP	9.17962e-07	BP chlorophyll metabolic process
GO:0044247	1.3732e-08	1	19	117	cellular polysaccharide catabolic process	BP	2.15961e-06	BP cellular polysaccharide catabolic process
GO:0047216	1.6008e-08	1	8	26	inositol 3-alpha-galactosyltransferase activity	MF	2.48722e-06	MF inositol 3-alpha-galactosyltransferase activity
GO:0015934	2.90773e-08	1	25	244	large ribosomal subunit	CC	4.46406e-06	CC large ribosomal subunit
GO:0009773	2.95552e-08	1	7	12	photosynthetic electron transport in photosystem I	BP	4.48405e-06	BP photosynthetic electron transport in photosystem I
GO:0009767	7.7469e-08	1	13	74	photosynthetic electron transport chain	BP	1.16167e-05	BP photosynthetic electron transport chain
GO:0031969	1.25709e-07	1	45	584	chloroplast membrane	CC	1.86338e-05	CC chloroplast membrane
GO:0006778	2.12561e-07	1	23	191	porphyrin-containing compound metabolic process	BP	3.11499e-05	BP porphyrin-containing compound metabolic process
GO:0016851	2.66122e-07	1	8	17	magnesium chelatase activity	MF	3.77132e-05	MF magnesium chelatase activity
GO:0051002	2.66122e-07	1	8	17	ligase activity, forming nitrogen-metal bonds	MF	3.77132e-05	MF ligase activity, forming nitrogen-metal bonds
GO:0051003	2.66122e-07	1	8	17	ligase activity, forming nitrogen-metal bonds, forming coordination complexes	MF	3.77132e-05	MF ligase activity, forming nitrogen-metal bonds, forming coordination complexes
GO:0033013	4.1992e-07	1	23	198	tetrapyrrole metabolic process	BP	5.88618e-05	BP tetrapyrrole metabolic process
GO:0042170	4.68282e-07	1	45	608	plastid membrane	CC	6.4935e-05	CC plastid membrane
GO:0016109	7.6054e-07	1	13	69	tetraterpenoid biosynthetic process	BP	0.000103169	BP tetraterpenoid biosynthetic process
GO:0016117	7.6054e-07	1	13	69	carotenoid biosynthetic process	BP	0.000103169	BP carotenoid biosynthetic process
GO:0043228	7.76005e-07	1	132	2533	non-membrane-bounded organelle	CC	0.000103169	CC non-membrane-bounded organelle
GO:0043232	7.76005e-07	1	132	2533	intracellular non-membrane-bounded organelle	CC	0.000103169	CC intracellular non-membrane-bounded organelle
GO:0032991	8.92996e-07	1	253	5584	macromolecular complex	CC	0.000117511	CC macromolecular complex
GO:0006631	9.28053e-07	1	53	834	fatty acid metabolic process	BP	0.000120891	BP fatty acid metabolic process
GO:0010007	1.15302e-06	1	4	4	magnesium chelatase complex	CC	0.000148693	CC magnesium chelatase complex
GO:0032544	1.29632e-06	1	6	12	plastid translation	BP	0.000165518	BP plastid translation
GO:0022625	1.53486e-06	1	19	191	cytosolic large ribosomal subunit	CC	0.00019388	CC cytosolic large ribosomal subunit
GO:0009416	1.54852e-06	0.999999	77	1258	response to light stimulus	BP	0.00019388	BP response to light stimulus
GO:0006633	1.58057e-06	0.999999	40	557	fatty acid biosynthetic process	BP	0.000195991	BP fatty acid biosynthetic process
GO:0031225	2.03229e-06	0.999999	33	391	anchored component of membrane	CC	0.000249604	CC anchored component of membrane
GO:0009628	2.26417e-06	0.999999	176	3543	response to abiotic stimulus	BP	0.000275459	BP response to abiotic stimulus
GO:0005622	2.7954e-06	0.999999	49	630	intracellular	CC	0.000336911	CC intracellular
GO:0008422	3.64223e-06	0.999999	22	216	beta-glucosidase activity	MF	0.00043491	MF beta-glucosidase activity
GO:0006629	3.79995e-06	0.999998	134	2747	lipid metabolic process	BP	0.00044958	BP lipid metabolic process
GO:0010345	4.97507e-06	0.999999	10	42	suberin biosynthetic process	BP	0.000576525	BP suberin biosynthetic process
GO:0000311	5.00206e-06	1	5	10	plastid large ribosomal subunit	CC	0.000576525	CC plastid large ribosomal subunit
GO:0009233	5.05174e-06	1	6	22	menaquinone metabolic process	BP	0.000576525	BP menaquinone metabolic process
GO:0009234	5.05174e-06	1	6	22	menaquinone biosynthetic process	BP	0.000576525	BP menaquinone biosynthetic process
GO:0009314	6.28794e-06	0.999997	78	1322	response to radiation	BP	0.00071131	BP response to radiation
GO:0015926	7.25889e-06	0.999998	27	341	glucosidase activity	MF	0.000814006	MF glucosidase activity
GO:0010109	7.69825e-06	0.999999	11	71	regulation of photosynthesis	BP	0.000851241	BP regulation of photosynthesis
GO:0016052	7.77673e-06	0.999996	53	895	carbohydrate catabolic process	BP	0.000851241	BP carbohydrate catabolic process
GO:0009063	7.78896e-06	0.999998	21	220	cellular amino acid catabolic process	BP	0.000851241	BP cellular amino acid catabolic process
GO:0016108	8.1391e-06	0.999999	13	83	tetraterpenoid metabolic process	BP	0.000874682	BP tetraterpenoid metabolic process
GO:0016116	8.1391e-06	0.999999	13	83	carotenoid metabolic process	BP	0.000874682	BP carotenoid metabolic process
GO:0010114	1.19633e-05	0.999998	12	73	response to red light	BP	0.00127504	BP response to red light
GO:0009538	1.21686e-05	1	5	8	photosystem I reaction center	CC	0.00128629	CC photosystem I reaction center
GO:0008266	1.26021e-05	0.999999	8	28	poly(U) RNA binding	MF	0.00132127	MF poly(U) RNA binding
GO:0010196	1.30857e-05	1	5	10	nonphotochemical quenching	BP	0.00135003	BP nonphotochemical quenching
GO:1990066	1.30857e-05	1	5	10	energy quenching	BP	0.00135003	BP energy quenching
GO:0008825	1.55352e-05	1	4	5	cyclopropane-fatty-acyl-phospholipid synthase activity	MF	0.00159001	MF cyclopropane-fatty-acyl-phospholipid synthase activity
GO:0044275	1.63267e-05	0.999995	19	194	cellular carbohydrate catabolic process	BP	0.00165787	BP cellular carbohydrate catabolic process
GO:0044699	1.74765e-05	0.999986	727	19190	single-organism process	BP	0.00176076	BP single-organism process
GO:0008187	1.81069e-05	0.999998	8	29	poly-pyrimidine tract binding	MF	0.00181013	MF poly-pyrimidine tract binding
GO:0072330	2.03275e-05	0.99999	46	757	monocarboxylic acid biosynthetic process	BP	0.00200465	BP monocarboxylic acid biosynthetic process
GO:0044238	2.03636e-05	0.999984	786	20603	primary metabolic process	BP	0.00200465	BP primary metabolic process
GO:0042761	2.08796e-05	0.999997	10	56	very long-chain fatty acid biosynthetic process	BP	0.00203987	BP very long-chain fatty acid biosynthetic process
GO:0051188	2.14543e-05	0.999991	33	485	cofactor biosynthetic process	BP	0.00208027	BP cofactor biosynthetic process
GO:0044249	2.17402e-05	0.999984	386	9562	cellular biosynthetic process	BP	0.00209225	BP cellular biosynthetic process
GO:0009658	2.29174e-05	0.999993	21	212	chloroplast organization	BP	0.00218921	BP chloroplast organization
GO:0042550	2.39348e-05	0.999999	5	17	photosystem I stabilization	BP	0.00224483	BP photosystem I stabilization
GO:0035250	2.40102e-05	0.999997	9	54	UDP-galactosyltransferase activity	MF	0.00224483	MF UDP-galactosyltransferase activity
GO:0016628	2.40219e-05	0.999995	13	99	oxidoreductase activity, acting on the CH-CH group of donors, NAD or NADP as acceptor	MF	0.00224483	MF oxidoreductase activity, acting on the CH-CH group of donors, NAD or NADP as acceptor
GO:0030243	2.83553e-05	0.999991	20	215	cellulose metabolic process	BP	0.00263072	BP cellulose metabolic process
GO:0030570	2.95508e-05	0.999996	9	45	pectate lyase activity	MF	0.00272205	MF pectate lyase activity
GO:0019318	3.0619e-05	0.999989	24	328	hexose metabolic process	BP	0.00280045	BP hexose metabolic process
GO:0016837	3.1525e-05	0.999996	9	46	carbon-oxygen lyase activity, acting on polysaccharides	MF	0.002863	MF carbon-oxygen lyase activity, acting on polysaccharides
GO:0009266	3.19758e-05	0.999983	62	1025	response to temperature stimulus	BP	0.00288363	BP response to temperature stimulus
GO:0035798	3.37312e-05	1	3	3	2-alkenal reductase (NADP+) activity	MF	0.00302081	MF 2-alkenal reductase (NADP+) activity
GO:0009783	3.91576e-05	1	3	4	photosystem II antenna complex	CC	0.00348259	CC photosystem II antenna complex
GO:0000038	3.96817e-05	0.999994	10	61	very long-chain fatty acid metabolic process	BP	0.00350503	BP very long-chain fatty acid metabolic process
GO:0005976	4.16059e-05	0.999977	65	1148	polysaccharide metabolic process	BP	0.00365	BP polysaccharide metabolic process
GO:0016705	4.32681e-05	0.999977	58	1105	oxidoreductase activity, acting on paired donors, with incorporation or reduction of molecular oxygen	MF	0.00377017	MF oxidoreductase activity, acting on paired donors, with incorporation or reduction of molecular oxygen
GO:0009699	4.49489e-05	0.999983	27	338	phenylpropanoid biosynthetic process	BP	0.00389034	BP phenylpropanoid biosynthetic process
GO:0030093	4.78703e-05	1	3	3	chloroplast photosystem I	CC	0.00411557	CC chloroplast photosystem I
GO:0019538	4.82934e-05	0.999964	283	6149	protein metabolic process	BP	0.00412445	BP protein metabolic process
GO:0010166	4.90846e-05	0.999989	13	116	wax metabolic process	BP	0.00416444	BP wax metabolic process
GO:0009698	5.14552e-05	0.999978	32	456	phenylpropanoid metabolic process	BP	0.00433703	BP phenylpropanoid metabolic process
GO:0008610	5.63662e-05	0.999966	84	1634	lipid biosynthetic process	BP	0.00470295	BP lipid biosynthetic process
GO:0046283	5.65259e-05	0.999986	14	120	anthocyanin-containing compound metabolic process	BP	0.00470295	BP anthocyanin-containing compound metabolic process
GO:0006546	6.54053e-05	0.999995	6	23	glycine catabolic process	BP	0.00540684	BP glycine catabolic process
GO:0009071	7.40921e-05	0.999994	6	24	serine family amino acid catabolic process	BP	0.00608593	BP serine family amino acid catabolic process
GO:0008465	8.08227e-05	0.999999	3	5	glycerate dehydrogenase activity	MF	0.00659677	MF glycerate dehydrogenase activity
GO:0050662	8.34694e-05	0.999955	57	1083	coenzyme binding	MF	0.00676995	MF coenzyme binding
GO:0009854	8.78646e-05	0.99999	7	49	oxidative photosynthetic carbon pathway	BP	0.00708189	BP oxidative photosynthetic carbon pathway
GO:0032787	9.1453e-05	0.999946	74	1492	monocarboxylic acid metabolic process	BP	0.00732533	BP monocarboxylic acid metabolic process
GO:0044464	9.62029e-05	0.999925	1076	30207	cell part	CC	0.00765823	CC cell part
GO:0080001	0.000111748	0.999982	9	53	mucilage extrusion from seed coat	BP	0.00884114	BP mucilage extrusion from seed coat
GO:0009812	0.000113551	0.999956	25	324	flavonoid metabolic process	BP	0.00890602	BP flavonoid metabolic process
GO:0042548	0.00011395	0.999984	8	53	regulation of photosynthesis, light reaction	BP	0.00890602	BP regulation of photosynthesis, light reaction
GO:0051753	0.00013489	0.999988	6	25	mannan synthase activity	MF	0.0104792	MF mannan synthase activity
GO:0046658	0.000141133	0.999947	23	279	anchored component of plasma membrane	CC	0.0108985	CC anchored component of plasma membrane
GO:0000315	0.000143496	0.999991	5	18	organellar large ribosomal subunit	CC	0.011015	CC organellar large ribosomal subunit
GO:0010361	0.000164431	0.999994	4	11	regulation of anion channel activity by blue light	BP	0.0124735	BP regulation of anion channel activity by blue light
GO:0010362	0.000164431	0.999994	4	11	negative regulation of anion channel activity by blue light	BP	0.0124735	BP negative regulation of anion channel activity by blue light
GO:0042132	0.000174246	0.999988	5	20	fructose 1,6-bisphosphate 1-phosphatase activity	MF	0.0131408	MF fructose 1,6-bisphosphate 1-phosphatase activity
GO:0050661	0.000184609	0.99994	18	205	NADP binding	MF	0.0138414	MF NADP binding
GO:0048037	0.000190285	0.999886	72	1521	cofactor binding	MF	0.0140168	MF cofactor binding
GO:0009503	0.000190488	0.999997	3	5	thylakoid light-harvesting complex	CC	0.0140168	CC thylakoid light-harvesting complex
GO:0009517	0.000190488	0.999997	3	5	PSII associated light-harvesting complex II	CC	0.0140168	CC PSII associated light-harvesting complex II
GO:0016712	0.000192383	0.999986	5	20	oxidoreductase activity, acting on paired donors, with incorporation or reduction of molecular oxygen, reduced flavin or flavoprotein as one donor, and incorporation of one atom of oxygen	MF	0.0140168	MF oxidoreductase activity, acting on paired donors, with incorporation or reduction of molecular oxygen, reduced flavin or flavoprotein as one donor, and incorporation of one atom of oxygen
GO:0070330	0.000192383	0.999986	5	20	aromatase activity	MF	0.0140168	MF aromatase activity
GO:0019187	0.000194552	0.999981	6	26	beta-1,4-mannosyltransferase activity	MF	0.0140952	MF beta-1,4-mannosyltransferase activity
GO:0042372	0.000197149	0.99998	6	36	phylloquinone biosynthetic process	BP	0.0141247	BP phylloquinone biosynthetic process
GO:0042374	0.000197149	0.99998	6	36	phylloquinone metabolic process	BP	0.0141247	BP phylloquinone metabolic process
GO:0045490	0.000204427	0.999932	18	219	pectin catabolic process	BP	0.0145651	BP pectin catabolic process
GO:0071482	0.000206908	0.999934	17	185	cellular response to light stimulus	BP	0.0146609	BP cellular response to light stimulus
GO:0009637	0.000221388	0.999932	16	178	response to blue light	BP	0.0156012	BP response to blue light
GO:0008236	0.000249009	0.999891	29	409	serine-type peptidase activity	MF	0.0173084	MF serine-type peptidase activity
GO:0017171	0.000249009	0.999891	29	409	serine hydrolase activity	MF	0.0173084	MF serine hydrolase activity
GO:0070204	0.000250982	0.999988	4	16	2-succinyl-5-enolpyruvyl-6-hydroxy-3-cyclohexene-1-carboxylic-acid synthase activity	MF	0.0173084	MF 2-succinyl-5-enolpyruvyl-6-hydroxy-3-cyclohexene-1-carboxylic-acid synthase activity
GO:0070205	0.000250982	0.999988	4	16	2-succinyl-6-hydroxy-2,4-cyclohexadiene-1-carboxylate synthase activity	MF	0.0173084	MF 2-succinyl-6-hydroxy-2,4-cyclohexadiene-1-carboxylate synthase activity
GO:0009657	0.000277248	0.999892	23	283	plastid organization	BP	0.0190181	BP plastid organization
GO:0005996	0.00028203	0.999877	28	464	monosaccharide metabolic process	BP	0.0192437	BP monosaccharide metabolic process
GO:0045548	0.000283812	0.999978	5	20	phenylalanine ammonia-lyase activity	MF	0.0192633	MF phenylalanine ammonia-lyase activity
GO:0006559	0.000294897	0.999959	7	43	L-phenylalanine catabolic process	BP	0.0195626	BP L-phenylalanine catabolic process
GO:1902222	0.000294897	0.999959	7	43	erythrose 4-phosphate/phosphoenolpyruvate family amino acid catabolic process	BP	0.0195626	BP erythrose 4-phosphate/phosphoenolpyruvate family amino acid catabolic process
GO:0052852	0.000295805	0.999986	4	11	very-long-chain-(S)-2-hydroxy-acid oxidase activity	MF	0.0195626	MF very-long-chain-(S)-2-hydroxy-acid oxidase activity
GO:0052853	0.000295805	0.999986	4	11	long-chain-(S)-2-hydroxy-long-chain-acid oxidase activity	MF	0.0195626	MF long-chain-(S)-2-hydroxy-long-chain-acid oxidase activity
GO:0052854	0.000295805	0.999986	4	11	medium-chain-(S)-2-hydroxy-acid oxidase activity	MF	0.0195626	MF medium-chain-(S)-2-hydroxy-acid oxidase activity
GO:0045036	0.000319961	0.999947	8	55	protein targeting to chloroplast	BP	0.0209452	BP protein targeting to chloroplast
GO:0072596	0.000319961	0.999947	8	55	establishment of protein localization to chloroplast	BP	0.0209452	BP establishment of protein localization to chloroplast
GO:0044550	0.000326029	0.999855	29	438	secondary metabolite biosynthetic process	BP	0.0212347	BP secondary metabolite biosynthetic process
GO:0016054	0.000340154	0.999858	25	393	organic acid catabolic process	BP	0.0218378	BP organic acid catabolic process
GO:0046395	0.000340154	0.999858	25	393	carboxylic acid catabolic process	BP	0.0218378	BP carboxylic acid catabolic process
GO:0071478	0.000340369	0.999887	17	193	cellular response to radiation	BP	0.0218378	BP cellular response to radiation
GO:0006012	0.000356928	0.999939	8	69	galactose metabolic process	BP	0.0227868	BP galactose metabolic process
GO:0009074	0.000362096	0.999939	8	55	aromatic amino acid family catabolic process	BP	0.0229494	BP aromatic amino acid family catabolic process
GO:0019898	0.000363364	0.999907	12	115	extrinsic component of membrane	CC	0.0229494	CC extrinsic component of membrane
GO:0006073	0.000366592	0.999821	35	592	cellular glucan metabolic process	BP	0.0229494	BP cellular glucan metabolic process
GO:0044042	0.000366592	0.999821	35	592	glucan metabolic process	BP	0.0229494	BP glucan metabolic process
GO:0071669	0.0003921	0.99985	21	266	plant-type cell wall organization or biogenesis	BP	0.0242505	BP plant-type cell wall organization or biogenesis
GO:0010430	0.000393001	0.99998	4	12	fatty acid omega-oxidation	BP	0.0242505	BP fatty acid omega-oxidation
GO:0016627	0.000394168	0.999868	17	194	oxidoreductase activity, acting on the CH-CH group of donors	MF	0.0242505	MF oxidoreductase activity, acting on the CH-CH group of donors
GO:0004497	0.000394898	0.999796	40	782	monooxygenase activity	MF	0.0242505	MF monooxygenase activity
GO:0005527	0.000460241	0.999919	8	60	macrolide binding	MF	0.0279966	MF macrolide binding
GO:0005528	0.000460241	0.999919	8	60	FK506 binding	MF	0.0279966	MF FK506 binding
GO:0010025	0.000510309	0.999873	11	112	wax biosynthetic process	BP	0.0308964	BP wax biosynthetic process
GO:0080167	0.000519632	0.999796	21	289	response to karrikin	BP	0.0313139	BP response to karrikin
GO:1901606	0.000523024	0.999826	16	188	alpha-amino acid catabolic process	BP	0.0313717	BP alpha-amino acid catabolic process
GO:0004252	0.000536009	0.999796	20	249	serine-type endopeptidase activity	MF	0.0320017	MF serine-type endopeptidase activity
GO:0004096	0.000549905	0.999947	5	31	catalase activity	MF	0.0326801	MF catalase activity
GO:0016767	0.000594195	0.999986	3	6	geranylgeranyl-diphosphate geranylgeranyltransferase activity	MF	0.0351502	MF geranylgeranyl-diphosphate geranylgeranyltransferase activity
GO:0016730	0.000611145	0.999943	5	22	oxidoreductase activity, acting on iron-sulfur proteins as donors	MF	0.0359878	MF oxidoreductase activity, acting on iron-sulfur proteins as donors
GO:0009295	0.00062583	0.999868	9	79	nucleoid	CC	0.0366445	CC nucleoid
GO:0008891	0.00062798	0.999987	3	5	glycolate oxidase activity	MF	0.0366445	MF glycolate oxidase activity
GO:0048359	0.000657068	0.999862	9	68	mucilage metabolic process involved in seed coat development	BP	0.0379452	BP mucilage metabolic process involved in seed coat development
GO:0010143	0.000657233	0.999917	6	30	cutin biosynthetic process	BP	0.0379452	BP cutin biosynthetic process
GO:0004324	0.000662041	0.999961	4	12	ferredoxin-NADP+ reductase activity	MF	0.0379452	MF ferredoxin-NADP+ reductase activity
GO:0016731	0.000662041	0.999961	4	12	oxidoreductase activity, acting on iron-sulfur proteins as donors, NAD or NADP as acceptor	MF	0.0379452	MF oxidoreductase activity, acting on iron-sulfur proteins as donors, NAD or NADP as acceptor
GO:0044283	0.000667501	0.999561	88	1968	small molecule biosynthetic process	BP	0.0380889	BP small molecule biosynthetic process
GO:0051273	0.000705215	0.999725	20	262	beta-glucan metabolic process	BP	0.0400019	BP beta-glucan metabolic process
GO:0008974	0.000707229	0.999985	3	5	phosphoribulokinase activity	MF	0.0400019	MF phosphoribulokinase activity
GO:0003973	0.000723655	0.999955	4	13	(S)-2-hydroxy-acid oxidase activity	MF	0.0407522	MF (S)-2-hydroxy-acid oxidase activity
GO:0008017	0.000733348	0.999732	18	175	microtubule binding	MF	0.0411185	MF microtubule binding
GO:0047259	0.000748197	0.999952	4	14	glucomannan 4-beta-mannosyltransferase activity	MF	0.0417695	MF glucomannan 4-beta-mannosyltransferase activity
GO:0009882	0.000766395	0.999951	4	14	blue light photoreceptor activity	MF	0.042601	MF blue light photoreceptor activity
GO:0008378	0.000795984	0.99976	13	160	galactosyltransferase activity	MF	0.0440558	MF galactosyltransferase activity
GO:0004337	0.000809828	0.999947	4	14	geranyltranstransferase activity	MF	0.0446305	MF geranyltranstransferase activity
GO:0080175	0.000859681	0.99998	3	5	phragmoplast microtubule organization	BP	0.0471764	BP phragmoplast microtubule organization
GO:0009813	0.00086356	0.999648	21	285	flavonoid biosynthetic process	BP	0.0471884	BP flavonoid biosynthetic process
GO:0042549	0.000882578	0.99997	3	9	photosystem II stabilization	BP	0.0480241	BP photosystem II stabilization
GO:0009902	0.000955396	0.999838	7	47	chloroplast relocation	BP	0.0515514	BP chloroplast relocation
GO:0051667	0.000955396	0.999838	7	47	establishment of plastid localization	BP	0.0515514	BP establishment of plastid localization
GO:0009744	0.000964707	0.999705	13	135	response to sucrose	BP	0.0515948	BP response to sucrose
GO:0034285	0.000964707	0.999705	13	135	response to disaccharide	BP	0.0515948	BP response to disaccharide
GO:0019748	0.000968202	0.999501	35	634	secondary metabolic process	BP	0.0515948	BP secondary metabolic process
GO:0035671	0.000984711	0.999937	4	11	enone reductase activity	MF	0.0522586	MF enone reductase activity
GO:0010360	0.00103235	0.999926	4	16	negative regulation of anion channel activity	BP	0.0545623	BP negative regulation of anion channel activity
GO:0007018	0.00110818	0.999606	16	177	microtubule-based movement	BP	0.0583308	BP microtubule-based movement
GO:0043467	0.00119821	0.999751	8	75	regulation of generation of precursor metabolites and energy	BP	0.0628135	BP regulation of generation of precursor metabolites and energy
GO:0010191	0.001221	0.999717	9	75	mucilage metabolic process	BP	0.0637489	BP mucilage metabolic process
GO:0008144	0.00124445	0.999709	9	84	drug binding	MF	0.0647112	MF drug binding
GO:0015631	0.00127329	0.99951	18	184	tubulin binding	MF	0.0659449	MF tubulin binding
GO:0044815	0.00138309	0.999609	11	123	DNA packaging complex	CC	0.0713454	CC DNA packaging complex
GO:1901663	0.0014254	0.999736	7	58	quinone biosynthetic process	BP	0.0731058	BP quinone biosynthetic process
GO:0010440	0.00142856	0.999899	4	11	stomatal lineage progression	BP	0.0731058	BP stomatal lineage progression
GO:0016165	0.00144037	0.999776	6	51	linoleate 13S-lipoxygenase activity	MF	0.0734189	MF linoleate 13S-lipoxygenase activity
GO:0010393	0.00147065	0.999359	22	317	galacturonan metabolic process	BP	0.0743745	BP galacturonan metabolic process
GO:0045488	0.00147065	0.999359	22	317	pectin metabolic process	BP	0.0743745	BP pectin metabolic process
GO:0016620	0.00148997	0.999495	14	181	oxidoreductase activity, acting on the aldehyde or oxo group of donors, NAD or NADP as acceptor	MF	0.0750572	MF oxidoreductase activity, acting on the aldehyde or oxo group of donors, NAD or NADP as acceptor
GO:0016829	0.00153714	0.999083	51	1065	lyase activity	MF	0.077122	MF lyase activity
GO:0009800	0.00155245	0.999815	5	27	cinnamic acid biosynthetic process	BP	0.077122	BP cinnamic acid biosynthetic process
GO:0009803	0.00155245	0.999815	5	27	cinnamic acid metabolic process	BP	0.077122	BP cinnamic acid metabolic process
GO:0008812	0.00156439	0.999873	4	17	choline dehydrogenase activity	MF	0.077122	MF choline dehydrogenase activity
GO:0046593	0.00156439	0.999873	4	17	mandelonitrile lyase activity	MF	0.077122	MF mandelonitrile lyase activity
GO:0047268	0.00156684	0.999932	3	10	galactinol-raffinose galactosyltransferase activity	MF	0.077122	MF galactinol-raffinose galactosyltransferase activity
GO:1990204	0.00157774	0.999414	16	229	oxidoreductase complex	CC	0.0773635	CC oxidoreductase complex
GO:0033385	0.00160688	0.999939	3	7	geranylgeranyl diphosphate metabolic process	BP	0.0782955	BP geranylgeranyl diphosphate metabolic process
GO:0005871	0.00160889	0.999429	15	166	kinesin complex	CC	0.0782955	CC kinesin complex
GO:0009528	0.00163425	0.99944	14	181	plastid inner membrane	CC	0.0792305	CC plastid inner membrane
GO:0003777	0.00167792	0.999401	15	168	microtubule motor activity	MF	0.0810427	MF microtubule motor activity
GO:0044267	0.00170404	0.998666	231	5228	cellular protein metabolic process	BP	0.0819974	BP cellular protein metabolic process
GO:0006544	0.00173222	0.999668	7	59	glycine metabolic process	BP	0.0830436	BP glycine metabolic process
GO:0032413	0.0017506	0.99985	4	20	negative regulation of ion transmembrane transporter activity	BP	0.0836137	BP negative regulation of ion transmembrane transporter activity
GO:0009072	0.00176182	0.999393	14	168	aromatic amino acid family metabolic process	BP	0.0838392	BP aromatic amino acid family metabolic process
GO:0022900	0.00180452	0.999346	15	222	electron transport chain	BP	0.0849836	BP electron transport chain
GO:0010077	0.00181169	0.999851	4	15	maintenance of inflorescence meristem identity	BP	0.0849836	BP maintenance of inflorescence meristem identity
GO:0016053	0.00181223	0.998815	72	1629	organic acid biosynthetic process	BP	0.0849836	BP organic acid biosynthetic process
GO:0046394	0.00181223	0.998815	72	1629	carboxylic acid biosynthetic process	BP	0.0849836	BP carboxylic acid biosynthetic process
GO:0046274	0.00189636	0.999573	8	85	lignin catabolic process	BP	0.0886066	BP lignin catabolic process
GO:0018685	0.00193133	0.999759	5	26	alkane 1-monooxygenase activity	MF	0.0899151	MF alkane 1-monooxygenase activity
GO:1901661	0.00199254	0.999608	7	61	quinone metabolic process	BP	0.0922152	BP quinone metabolic process
GO:0050665	0.00199933	0.99982	4	21	hydrogen peroxide biosynthetic process	BP	0.0922152	BP hydrogen peroxide biosynthetic process
GO:0016832	0.00200219	0.999606	7	59	aldehyde-lyase activity	MF	0.0922152	MF aldehyde-lyase activity
GO:0016840	0.00206989	0.999533	8	68	carbon-nitrogen lyase activity	MF	0.0949941	MF carbon-nitrogen lyase activity
GO:0043094	0.00208129	0.999205	16	239	cellular metabolic compound salvage	BP	0.0951681	BP cellular metabolic compound salvage
GO:0004375	0.00209582	0.999899	3	10	glycine dehydrogenase (decarboxylating) activity	MF	0.0951681	MF glycine dehydrogenase (decarboxylating) activity
GO:0016642	0.00209582	0.999899	3	10	oxidoreductase activity, acting on the CH-NH2 group of donors, disulfide as acceptor	MF	0.0951681	MF oxidoreductase activity, acting on the CH-NH2 group of donors, disulfide as acceptor
GO:0032410	0.0021114	0.999808	4	21	negative regulation of transporter activity	BP	0.0954878	BP negative regulation of transporter activity
GO:0016841	0.00211767	0.999648	6	45	ammonia-lyase activity	MF	0.0954878	MF ammonia-lyase activity
GO:0009808	0.00220424	0.999186	15	205	lignin metabolic process	BP	0.0990447	BP lignin metabolic process
GO:0016210	0.00229525	0.99988	3	12	naringenin-chalcone synthase activity	MF	0.101647	MF naringenin-chalcone synthase activity
GO:0030246	0.00230102	0.998727	37	682	carbohydrate binding	MF	0.101647	MF carbohydrate binding
GO:0016824	0.00230157	1	2	2	hydrolase activity, acting on acid halide bonds	MF	0.101647	MF hydrolase activity, acting on acid halide bonds
GO:0018786	0.00230157	1	2	2	haloalkane dehalogenase activity	MF	0.101647	MF haloalkane dehalogenase activity
GO:0019120	0.00230157	1	2	2	hydrolase activity, acting on acid halide bonds, in C-halide compounds	MF	0.101647	MF hydrolase activity, acting on acid halide bonds, in C-halide compounds
GO:0044264	0.00232044	0.998665	42	772	cellular polysaccharide metabolic process	BP	0.101974	BP cellular polysaccharide metabolic process
GO:0042181	0.00232918	0.999459	8	82	ketone biosynthetic process	BP	0.101974	BP ketone biosynthetic process
GO:0009740	0.00235062	0.999342	10	99	gibberellic acid mediated signaling pathway	BP	0.101974	BP gibberellic acid mediated signaling pathway
GO:0010476	0.00235062	0.999342	10	99	gibberellin mediated signaling pathway	BP	0.101974	BP gibberellin mediated signaling pathway
GO:0071370	0.00235062	0.999342	10	99	cellular response to gibberellin stimulus	BP	0.101974	BP cellular response to gibberellin stimulus
GO:0003755	0.00235641	0.999242	12	136	peptidyl-prolyl cis-trans isomerase activity	MF	0.101974	MF peptidyl-prolyl cis-trans isomerase activity
GO:0009344	0.00237027	1	2	2	nitrite reductase complex [NAD(P)H]	CC	0.102231	CC nitrite reductase complex [NAD(P)H]
GO:0016747	0.00237932	0.998628	42	806	transferase activity, transferring acyl groups other than amino-acyl groups	MF	0.102279	MF transferase activity, transferring acyl groups other than amino-acyl groups
GO:0051287	0.00245276	0.999015	17	270	NAD binding	MF	0.104198	MF NAD binding
GO:0030076	0.00246013	0.999863	3	15	light-harvesting complex	CC	0.104198	CC light-harvesting complex
GO:0008191	0.00246437	0.999976	2	3	metalloendopeptidase inhibitor activity	MF	0.104198	MF metalloendopeptidase inhibitor activity
GO:0010576	0.00246437	0.999976	2	3	metalloenzyme regulator activity	MF	0.104198	MF metalloenzyme regulator activity
GO:0048551	0.00246437	0.999976	2	3	metalloenzyme inhibitor activity	MF	0.104198	MF metalloenzyme inhibitor activity
GO:0016713	0.00250862	0.999666	5	27	oxidoreductase activity, acting on paired donors, with incorporation or reduction of molecular oxygen, reduced iron-sulfur protein as one donor, and incorporation of one atom of oxygen	MF	0.105723	MF oxidoreductase activity, acting on paired donors, with incorporation or reduction of molecular oxygen, reduced iron-sulfur protein as one donor, and incorporation of one atom of oxygen
GO:0006721	0.00257729	0.998736	26	428	terpenoid metabolic process	BP	0.108263	BP terpenoid metabolic process
GO:0044085	0.00267215	0.998778	22	309	cellular component biogenesis	BP	0.111883	BP cellular component biogenesis
GO:0015930	0.00269069	0.999855	3	11	glutamate synthase activity	MF	0.112295	MF glutamate synthase activity
GO:0005960	0.0028388	0.999859	3	8	glycine cleavage complex	CC	0.118094	CC glycine cleavage complex
GO:0000312	0.00288336	1	2	2	plastid small ribosomal subunit	CC	0.119562	CC plastid small ribosomal subunit
GO:0016630	0.0029306	1	2	2	protochlorophyllide reductase activity	MF	0.120155	MF protochlorophyllide reductase activity
GO:0033519	0.00293492	1	2	2	phytyl diphosphate metabolic process	BP	0.120155	BP phytyl diphosphate metabolic process
GO:0033521	0.00293492	1	2	2	phytyl diphosphate biosynthetic process	BP	0.120155	BP phytyl diphosphate biosynthetic process
GO:0045550	0.00293492	1	2	2	geranylgeranyl reductase activity	MF	0.120155	MF geranylgeranyl reductase activity
GO:0071554	0.00300832	0.998405	31	551	cell wall organization or biogenesis	BP	0.12277	BP cell wall organization or biogenesis
GO:0010206	0.00304744	0.999561	5	38	photosystem II repair	BP	0.123974	BP photosystem II repair
GO:0043650	0.0030977	0.999165	9	100	dicarboxylic acid biosynthetic process	BP	0.125623	BP dicarboxylic acid biosynthetic process
GO:0016123	0.00311164	0.999692	4	18	xanthophyll biosynthetic process	BP	0.125792	BP xanthophyll biosynthetic process
GO:0000914	0.00329327	0.999838	3	7	phragmoplast assembly	BP	0.132305	BP phragmoplast assembly
GO:1902407	0.00329327	0.999838	3	7	assembly of actomyosin apparatus involved in mitotic cytokinesis	BP	0.132305	BP assembly of actomyosin apparatus involved in mitotic cytokinesis
GO:0009718	0.00330853	0.999026	10	105	anthocyanin-containing compound biosynthetic process	BP	0.132506	BP anthocyanin-containing compound biosynthetic process
GO:0004312	0.00341897	0.999164	8	67	fatty acid synthase activity	MF	0.136505	MF fatty acid synthase activity
GO:0009706	0.00344974	0.99877	13	177	chloroplast inner membrane	CC	0.137308	CC chloroplast inner membrane
GO:0000413	0.00379246	0.999048	8	80	protein peptidyl-prolyl isomerization	BP	0.150485	BP protein peptidyl-prolyl isomerization
GO:0005507	0.00381364	0.998043	27	479	copper ion binding	MF	0.150861	MF copper ion binding
GO:0020037	0.0038278	0.997744	41	910	heme binding	MF	0.150958	MF heme binding
GO:0004970	0.00391162	0.999405	5	36	ionotropic glutamate receptor activity	MF	0.15194	MF ionotropic glutamate receptor activity
GO:0005230	0.00391162	0.999405	5	36	extracellular ligand-gated ion channel activity	MF	0.15194	MF extracellular ligand-gated ion channel activity
GO:0005231	0.00391162	0.999405	5	36	excitatory extracellular ligand-gated ion channel activity	MF	0.15194	MF excitatory extracellular ligand-gated ion channel activity
GO:0005234	0.00391162	0.999405	5	36	extracellular-glutamate-gated ion channel activity	MF	0.15194	MF extracellular-glutamate-gated ion channel activity
GO:0008066	0.00391162	0.999405	5	36	glutamate receptor activity	MF	0.15194	MF glutamate receptor activity
GO:0044282	0.00396804	0.997928	28	544	small molecule catabolic process	BP	0.153669	BP small molecule catabolic process
GO:0006013	0.00399111	0.999565	4	21	mannose metabolic process	BP	0.1541	BP mannose metabolic process
GO:0010214	0.00412403	0.998846	9	87	seed coat development	BP	0.158757	BP seed coat development
GO:0050982	0.00415039	0.999738	3	11	detection of mechanical stimulus	BP	0.159296	BP detection of mechanical stimulus
GO:0009922	0.00418417	0.999535	4	22	fatty acid elongase activity	MF	0.160116	MF fatty acid elongase activity
GO:0009508	0.00424001	0.999731	3	11	plastid chromosome	CC	0.161387	CC plastid chromosome
GO:0044255	0.00424956	0.996992	91	2096	cellular lipid metabolic process	BP	0.161387	BP cellular lipid metabolic process
GO:0009785	0.00425493	0.999172	6	57	blue light signaling pathway	BP	0.161387	BP blue light signaling pathway
GO:0006082	0.00430799	0.996791	125	3166	organic acid metabolic process	BP	0.162663	BP organic acid metabolic process
GO:0016114	0.0043138	0.99794	22	359	terpenoid biosynthetic process	BP	0.162663	BP terpenoid biosynthetic process
GO:0005874	0.00447719	0.997589	30	511	microtubule	CC	0.168332	CC microtubule
GO:0000229	0.00474413	0.999679	3	12	cytoplasmic chromosome	CC	0.177339	CC cytoplasmic chromosome
GO:0045038	0.00474426	0.999674	3	13	protein import into chloroplast thylakoid membrane	BP	0.177339	BP protein import into chloroplast thylakoid membrane
GO:0055028	0.00481627	0.999067	6	38	cortical microtubule	CC	0.17951	CC cortical microtubule
GO:0042311	0.00484149	0.99989	2	5	vasodilation	BP	0.17993	BP vasodilation
GO:0071214	0.00490448	0.997729	20	301	cellular response to abiotic stimulus	BP	0.181747	BP cellular response to abiotic stimulus
GO:0009772	0.00505677	0.999384	4	32	photosynthetic electron transport in photosystem II	BP	0.186854	BP photosynthetic electron transport in photosystem II
GO:0042180	0.00507576	0.998654	8	91	cellular ketone metabolic process	BP	0.18702	BP cellular ketone metabolic process
GO:0033971	0.00513579	0.999896	2	4	hydroxyisourate hydrolase activity	MF	0.188693	MF hydroxyisourate hydrolase activity
GO:0000030	0.00520548	0.99895	6	52	mannosyltransferase activity	MF	0.190399	MF mannosyltransferase activity
GO:0016859	0.00521176	0.998145	12	148	cis-trans isomerase activity	MF	0.190399	MF cis-trans isomerase activity
GO:0004064	0.00528385	0.999923	2	3	arylesterase activity	MF	0.192487	MF arylesterase activity
GO:0006457	0.00531487	0.997244	26	439	protein folding	BP	0.192702	BP protein folding
GO:0009832	0.00531963	0.998104	12	142	plant-type cell wall biogenesis	BP	0.192702	BP plant-type cell wall biogenesis
GO:0050308	0.00544318	0.999107	5	35	sugar-phosphatase activity	MF	0.196625	MF sugar-phosphatase activity
GO:0010218	0.00552656	0.998371	9	103	response to far red light	BP	0.198642	BP response to far red light
GO:0046417	0.0055298	0.998873	6	50	chorismate metabolic process	BP	0.198642	BP chorismate metabolic process
GO:0005985	0.00564275	0.998337	9	94	sucrose metabolic process	BP	0.202136	BP sucrose metabolic process
GO:0019752	0.00572121	0.995728	119	3042	carboxylic acid metabolic process	BP	0.204379	BP carboxylic acid metabolic process
GO:0009955	0.00576421	0.999591	3	11	adaxial/abaxial pattern specification	BP	0.205346	BP adaxial/abaxial pattern specification
GO:0006558	0.00589889	0.998574	7	71	L-phenylalanine metabolic process	BP	0.208989	BP L-phenylalanine metabolic process
GO:1902221	0.00589889	0.998574	7	71	erythrose 4-phosphate/phosphoenolpyruvate family amino acid metabolic process	BP	0.208989	BP erythrose 4-phosphate/phosphoenolpyruvate family amino acid metabolic process
GO:0018208	0.00592961	0.998388	8	88	peptidyl-proline modification	BP	0.209502	BP peptidyl-proline modification
GO:0046271	0.00601244	0.998351	8	105	phenylpropanoid catabolic process	BP	0.211848	BP phenylpropanoid catabolic process
GO:0045486	0.00604492	0.998976	5	38	naringenin 3-dioxygenase activity	MF	0.212412	MF naringenin 3-dioxygenase activity
GO:0050278	0.00611912	0.999864	2	4	sedoheptulose-bisphosphatase activity	MF	0.214435	MF sedoheptulose-bisphosphatase activity
GO:0009834	0.00631608	0.998107	9	93	plant-type secondary cell wall biogenesis	BP	0.220737	BP plant-type secondary cell wall biogenesis
GO:0004137	0.0064036	0.999855	2	4	deoxycytidine kinase activity	MF	0.223191	MF deoxycytidine kinase activity
GO:0043436	0.00653848	0.995074	123	3154	oxoacid metabolic process	BP	0.226799	BP oxoacid metabolic process
GO:0052716	0.00654227	0.998376	7	84	hydroquinone:oxygen oxidoreductase activity	MF	0.226799	MF hydroquinone:oxygen oxidoreductase activity
GO:0010207	0.00668043	0.999195	4	16	photosystem II assembly	BP	0.230967	BP photosystem II assembly
GO:0003993	0.0068091	0.997933	9	95	acid phosphatase activity	MF	0.234787	MF acid phosphatase activity
GO:0005262	0.00687053	0.998526	6	55	calcium channel activity	MF	0.236273	MF calcium channel activity
GO:0030388	0.00735432	0.999399	3	14	fructose 1,6-bisphosphate metabolic process	BP	0.252237	BP fructose 1,6-bisphosphate metabolic process
GO:0070588	0.00758317	0.998085	7	67	calcium ion transmembrane transport	BP	0.259397	BP calcium ion transmembrane transport
GO:0008574	0.00790281	0.999406	3	9	ATP-dependent microtubule motor activity, plus-end-directed	MF	0.269615	MF ATP-dependent microtubule motor activity, plus-end-directed
GO:0016166	0.00796331	0.999856	2	3	phytoene dehydrogenase activity	MF	0.270963	MF phytoene dehydrogenase activity
GO:0009842	0.00811311	0.999792	2	4	cyanelle	CC	0.275333	CC cyanelle
GO:0009817	0.00818591	0.997902	7	67	defense response to fungus, incompatible interaction	BP	0.277075	BP defense response to fungus, incompatible interaction
GO:0000786	0.00827799	0.997387	9	118	nucleosome	CC	0.278728	CC nucleosome
GO:1990104	0.00827799	0.997387	9	118	DNA bending complex	CC	0.278728	CC DNA bending complex
GO:0019464	0.00840055	0.999746	2	5	glycine decarboxylation via glycine cleavage system	BP	0.282119	BP glycine decarboxylation via glycine cleavage system
GO:0005506	0.00880419	0.994444	44	1053	iron ion binding	MF	0.294906	MF iron ion binding
GO:0008381	0.00924943	0.99919	3	13	mechanically-gated ion channel activity	MF	0.308219	MF mechanically-gated ion channel activity
GO:0022833	0.00924943	0.99919	3	13	mechanically gated channel activity	MF	0.308219	MF mechanically gated channel activity
GO:0042579	0.00944011	0.994799	27	528	microbody	CC	0.313762	CC microbody
GO:0010074	0.00951948	0.997491	7	66	maintenance of meristem identity	BP	0.31504	BP maintenance of meristem identity
GO:0030522	0.00956422	0.99778	6	65	intracellular receptor signaling pathway	BP	0.31504	BP intracellular receptor signaling pathway
GO:0046785	0.00962514	0.99973	2	4	microtubule polymerization	BP	0.31504	BP microtubule polymerization
GO:0052093	0.00962514	0.99973	2	4	formation of specialized structure for nutrient acquisition from host	BP	0.31504	BP formation of specialized structure for nutrient acquisition from host
GO:0052095	0.00962514	0.99973	2	4	formation of specialized structure for nutrient acquisition from other organism involved in symbiotic interaction	BP	0.31504	BP formation of specialized structure for nutrient acquisition from other organism involved in symbiotic interaction
GO:0052096	0.00962514	0.99973	2	4	formation by symbiont of syncytium involving giant cell for nutrient acquisition from host	BP	0.31504	BP formation by symbiont of syncytium involving giant cell for nutrient acquisition from host
GO:0016051	0.00966927	0.993842	45	890	carbohydrate biosynthetic process	BP	0.315683	BP carbohydrate biosynthetic process
GO:0042616	0.00980625	0.999722	2	4	paclitaxel metabolic process	BP	0.318542	BP paclitaxel metabolic process
GO:0042617	0.00980625	0.999722	2	4	paclitaxel biosynthetic process	BP	0.318542	BP paclitaxel biosynthetic process
GO:0006508	0.00991588	0.993469	52	951	proteolysis	BP	0.320025	BP proteolysis
GO:0033531	0.00993347	0.999624	2	7	stachyose metabolic process	BP	0.320025	BP stachyose metabolic process
GO:0033532	0.00993347	0.999624	2	7	stachyose biosynthetic process	BP	0.320025	BP stachyose biosynthetic process
GO:0045962	0.00995115	0.999185	3	9	positive regulation of development, heterochronic	BP	0.320025	BP positive regulation of development, heterochronic
GO:0080085	0.0104992	0.999691	2	4	signal recognition particle, chloroplast targeting	CC	0.336811	CC signal recognition particle, chloroplast targeting
GO:0003849	0.0107187	0.998983	3	15	3-deoxy-7-phosphoheptulonate synthase activity	MF	0.342027	MF 3-deoxy-7-phosphoheptulonate synthase activity
GO:0003018	0.0107679	0.999597	2	6	vascular process in circulatory system	BP	0.342027	BP vascular process in circulatory system
GO:0035150	0.0107679	0.999597	2	6	regulation of tube size	BP	0.342027	BP regulation of tube size
GO:0050880	0.0107679	0.999597	2	6	regulation of blood vessel size	BP	0.342027	BP regulation of blood vessel size
GO:0071483	0.0109095	0.997393	6	66	cellular response to blue light	BP	0.345672	BP cellular response to blue light
GO:0090447	0.0109861	0.999036	3	10	glycerol-3-phosphate 2-O-acyltransferase activity	MF	0.347248	MF glycerol-3-phosphate 2-O-acyltransferase activity
GO:0016746	0.0110548	0.992974	43	909	transferase activity, transferring acyl groups	MF	0.348565	MF transferase activity, transferring acyl groups
GO:0015935	0.0111361	0.995396	13	220	small ribosomal subunit	CC	0.350271	CC small ribosomal subunit
GO:0003886	0.0113736	0.998989	3	10	DNA (cytosine-5-)-methyltransferase activity	MF	0.356005	MF DNA (cytosine-5-)-methyltransferase activity
GO:0009008	0.0113736	0.998989	3	10	DNA-methyltransferase activity	MF	0.356005	MF DNA-methyltransferase activity
GO:0051186	0.0115353	0.99297	36	777	cofactor metabolic process	BP	0.360191	BP cofactor metabolic process
GO:0080051	0.0115819	0.998857	3	16	cutin transport	BP	0.360774	BP cutin transport
GO:0042546	0.0121219	0.995171	12	158	cell wall biogenesis	BP	0.376684	BP cell wall biogenesis
GO:0004318	0.012396	0.999602	2	4	enoyl-[acyl-carrier-protein] reductase (NADH) activity	MF	0.381129	MF enoyl-[acyl-carrier-protein] reductase (NADH) activity
GO:0016631	0.012396	0.999602	2	4	enoyl-[acyl-carrier-protein] reductase activity	MF	0.381129	MF enoyl-[acyl-carrier-protein] reductase activity
GO:0000324	0.0125014	0.998848	3	10	fungal-type vacuole	CC	0.381129	CC fungal-type vacuole
GO:0005302	0.0125014	0.998848	3	10	L-tyrosine transmembrane transporter activity	MF	0.381129	MF L-tyrosine transmembrane transporter activity
GO:0015188	0.0125014	0.998848	3	10	L-isoleucine transmembrane transporter activity	MF	0.381129	MF L-isoleucine transmembrane transporter activity
GO:0015658	0.0125014	0.998848	3	10	branched-chain amino acid transmembrane transporter activity	MF	0.381129	MF branched-chain amino acid transmembrane transporter activity
GO:0015828	0.0125014	0.998848	3	10	tyrosine transport	BP	0.381129	BP tyrosine transport
GO:1902475	0.0125014	0.998848	3	10	L-alpha-amino acid transmembrane transport	BP	0.381129	BP L-alpha-amino acid transmembrane transport
GO:0005881	0.0126438	0.996945	6	46	cytoplasmic microtubule	CC	0.384563	CC cytoplasmic microtubule
GO:0030091	0.0126813	0.997387	5	47	protein repair	BP	0.384794	BP protein repair
GO:0019842	0.0133122	0.994855	11	172	vitamin binding	MF	0.402991	MF vitamin binding
GO:0000314	0.0134597	0.999548	2	4	organellar small ribosomal subunit	CC	0.406502	CC organellar small ribosomal subunit
GO:0005875	0.0136178	0.993841	15	213	microtubule associated complex	CC	0.409502	CC microtubule associated complex
GO:0016903	0.0136226	0.994011	14	235	oxidoreductase activity, acting on the aldehyde or oxo group of donors	MF	0.409502	MF oxidoreductase activity, acting on the aldehyde or oxo group of donors
GO:0047782	0.0137001	0.999536	2	4	coniferin beta-glucosidase activity	MF	0.410876	MF coniferin beta-glucosidase activity
GO:0097502	0.0137471	0.997122	5	44	mannosylation	BP	0.411328	BP mannosylation
GO:0015276	0.0138357	0.996529	6	62	ligand-gated ion channel activity	MF	0.412067	MF ligand-gated ion channel activity
GO:0022834	0.0138357	0.996529	6	62	ligand-gated channel activity	MF	0.412067	MF ligand-gated channel activity
GO:0010076	0.0139523	0.998525	3	16	maintenance of floral meristem identity	BP	0.414584	BP maintenance of floral meristem identity
GO:0009607	0.0142452	0.989562	83	1931	response to biotic stimulus	BP	0.422313	BP response to biotic stimulus
GO:0009664	0.0144303	0.995015	9	119	plant-type cell wall organization	BP	0.426818	BP plant-type cell wall organization
GO:0015803	0.0146807	0.998497	3	12	branched-chain amino acid transport	BP	0.43323	BP branched-chain amino acid transport
GO:0005773	0.014827	0.98981	57	1236	vacuole	CC	0.436079	CC vacuole
GO:0010035	0.0148448	0.989124	82	1880	response to inorganic substance	BP	0.436079	BP response to inorganic substance
GO:0015923	0.0148882	0.99568	7	81	mannosidase activity	MF	0.43636	MF mannosidase activity
GO:0009423	0.0149499	0.996799	5	45	chorismate biosynthetic process	BP	0.437174	BP chorismate biosynthetic process
GO:0003727	0.0151128	0.995193	8	77	single-stranded RNA binding	MF	0.440938	MF single-stranded RNA binding
GO:0005504	0.0151654	0.998274	3	23	fatty acid binding	MF	0.441126	MF fatty acid binding
GO:0015908	0.0151877	0.998295	3	20	fatty acid transport	BP	0.441126	BP fatty acid transport
GO:0042254	0.0152983	0.99469	9	103	ribosome biogenesis	BP	0.443334	BP ribosome biogenesis
GO:0008289	0.0153324	0.990694	33	636	lipid binding	MF	0.443334	MF lipid binding
GO:0042743	0.0155883	0.993842	11	166	hydrogen peroxide metabolic process	BP	0.449725	BP hydrogen peroxide metabolic process
GO:0009554	0.0159956	0.999411	2	4	megasporogenesis	BP	0.460444	BP megasporogenesis
GO:0047668	0.0161876	0.999307	2	5	amygdalin beta-glucosidase activity	MF	0.462279	MF amygdalin beta-glucosidase activity
GO:0080081	0.0161876	0.999307	2	5	4-methylumbelliferyl-beta-D-glucopyranoside beta-glucosidase activity	MF	0.462279	MF 4-methylumbelliferyl-beta-D-glucopyranoside beta-glucosidase activity
GO:0080082	0.0161876	0.999307	2	5	esculin beta-glucosidase activity	MF	0.462279	MF esculin beta-glucosidase activity
GO:0009624	0.0162027	0.993287	12	156	response to nematode	BP	0.462279	BP response to nematode
GO:0009639	0.0162546	0.991707	19	311	response to red or far red light	BP	0.462735	BP response to red or far red light
GO:0051656	0.0163931	0.995162	7	77	establishment of organelle localization	BP	0.464321	BP establishment of organelle localization
GO:0044092	0.0164148	0.991614	19	318	negative regulation of molecular function	BP	0.464321	BP negative regulation of molecular function
GO:0009704	0.0164183	0.997177	4	33	de-etiolation	BP	0.464321	BP de-etiolation
GO:0006720	0.0165058	0.990593	26	494	isoprenoid metabolic process	BP	0.465774	BP isoprenoid metabolic process
GO:0016614	0.01698	0.989605	33	700	oxidoreductase activity, acting on CH-OH group of donors	MF	0.47811	MF oxidoreductase activity, acting on CH-OH group of donors
GO:0010297	0.0170181	0.999087	2	9	heteropolysaccharide binding	MF	0.478138	MF heteropolysaccharide binding
GO:0006868	0.0171436	0.998109	3	13	glutamine transport	BP	0.48025	BP glutamine transport
GO:0019827	0.0171954	0.994357	8	93	stem cell population maintenance	BP	0.48025	BP stem cell population maintenance
GO:1901575	0.017205	0.986477	132	3315	organic substance catabolic process	BP	0.48025	BP organic substance catabolic process
GO:0016042	0.0173242	0.989746	29	624	lipid catabolic process	BP	0.482534	BP lipid catabolic process
GO:0071230	0.017447	0.996092	5	50	cellular response to amino acid stimulus	BP	0.484905	BP cellular response to amino acid stimulus
GO:0015245	0.0175614	0.997943	3	18	fatty acid transporter activity	MF	0.485962	MF fatty acid transporter activity
GO:0016853	0.0175898	0.989386	31	636	isomerase activity	MF	0.485962	MF isomerase activity
GO:0005853	0.017598	0.997891	3	22	eukaryotic translation elongation factor 1 complex	CC	0.485962	CC eukaryotic translation elongation factor 1 complex
GO:0009341	0.0176476	0.997057	4	20	beta-galactosidase complex	CC	0.486289	CC beta-galactosidase complex
GO:0006537	0.0179048	0.997888	3	18	glutamate biosynthetic process	BP	0.492324	BP glutamate biosynthetic process
GO:0015036	0.018122	0.992043	13	194	disulfide oxidoreductase activity	MF	0.497236	MF disulfide oxidoreductase activity
GO:0008168	0.0183505	0.988539	35	680	methyltransferase activity	MF	0.501675	MF methyltransferase activity
GO:0000323	0.0183615	0.992986	10	125	lytic vacuole	CC	0.501675	CC lytic vacuole
GO:0010295	0.0184308	0.997882	3	14	(+)-abscisic acid 8'-hydroxylase activity	MF	0.502501	MF (+)-abscisic acid 8'-hydroxylase activity
GO:0009934	0.018847	0.994943	6	61	regulation of meristem structural organization	BP	0.512765	BP regulation of meristem structural organization
GO:0005777	0.0191757	0.989188	24	493	peroxisome	CC	0.52005	CC peroxisome
GO:0016741	0.0191954	0.987886	36	706	transferase activity, transferring one-carbon groups	MF	0.52005	MF transferase activity, transferring one-carbon groups
GO:0051920	0.019244	0.997615	3	22	peroxiredoxin activity	MF	0.520273	MF peroxiredoxin activity
GO:2000121	0.0194708	0.998947	2	7	regulation of removal of superoxide radicals	BP	0.525305	BP regulation of removal of superoxide radicals
GO:0015186	0.0196175	0.997759	3	12	L-glutamine transmembrane transporter activity	MF	0.528157	MF L-glutamine transmembrane transporter activity
GO:0009509	0.020183	0.997548	3	16	chromoplast	CC	0.541186	CC chromoplast
GO:0009743	0.0201854	0.989886	17	298	response to carbohydrate	BP	0.541186	BP response to carbohydrate
GO:0004650	0.0202328	0.992588	9	128	polygalacturonase activity	MF	0.541331	MF polygalacturonase activity
GO:0071324	0.0207357	0.997479	3	15	cellular response to disaccharide stimulus	BP	0.552496	BP cellular response to disaccharide stimulus
GO:0071329	0.0207357	0.997479	3	15	cellular response to sucrose stimulus	BP	0.552496	BP cellular response to sucrose stimulus
GO:0080083	0.0207822	0.997389	3	19	beta-gentiobiose beta-glucosidase activity	MF	0.552592	MF beta-gentiobiose beta-glucosidase activity
GO:0004180	0.0210098	0.992268	9	120	carboxypeptidase activity	MF	0.557495	MF carboxypeptidase activity
GO:0005835	0.0212183	0.99895	2	5	fatty acid synthase complex	CC	0.56111	CC fatty acid synthase complex
GO:0033807	0.0212331	0.99737	3	16	icosanoyl-CoA synthase activity	MF	0.56111	MF icosanoyl-CoA synthase activity
GO:0010181	0.0214691	0.992581	8	133	FMN binding	MF	0.566188	MF FMN binding
GO:0010037	0.0215973	0.998829	2	6	response to carbon dioxide	BP	0.568404	BP response to carbon dioxide
GO:0005089	0.0217961	0.994845	5	48	Rho guanyl-nucleotide exchange factor activity	MF	0.572471	MF Rho guanyl-nucleotide exchange factor activity
GO:0070402	0.0219127	0.997209	3	18	NADPH binding	MF	0.574362	MF NADPH binding
GO:0006662	0.0220256	0.992399	8	107	glycerol ether metabolic process	BP	0.576151	BP glycerol ether metabolic process
GO:0003916	0.0227129	0.995738	4	29	DNA topoisomerase activity	MF	0.591728	MF DNA topoisomerase activity
GO:0006265	0.0227129	0.995738	4	29	DNA topological change	BP	0.591728	BP DNA topological change
GO:0015173	0.022843	0.997189	3	13	aromatic amino acid transmembrane transporter activity	MF	0.593918	MF aromatic amino acid transmembrane transporter activity
GO:0010226	0.0234506	0.998412	2	13	response to lithium ion	BP	0.607661	BP response to lithium ion
GO:0016107	0.0235601	0.996993	3	15	sesquiterpenoid catabolic process	BP	0.607661	BP sesquiterpenoid catabolic process
GO:0043290	0.0235601	0.996993	3	15	apocarotenoid catabolic process	BP	0.607661	BP apocarotenoid catabolic process
GO:0046345	0.0235601	0.996993	3	15	abscisic acid catabolic process	BP	0.607661	BP abscisic acid catabolic process
GO:0045727	0.0236321	0.994293	5	48	positive regulation of translation	BP	0.608302	BP positive regulation of translation
GO:0051775	0.0237831	0.998642	2	6	response to redox state	BP	0.609418	BP response to redox state
GO:0009638	0.0237847	0.99321	6	76	phototropism	BP	0.609418	BP phototropism
GO:0001101	0.0238172	0.981847	93	2214	response to acid chemical	BP	0.609418	BP response to acid chemical
GO:0042742	0.02398	0.984323	39	802	defense response to bacterium	BP	0.61237	BP defense response to bacterium
GO:0016835	0.024053	0.986327	23	484	carbon-oxygen lyase activity	MF	0.612965	MF carbon-oxygen lyase activity
GO:0009617	0.0240984	0.983898	43	897	response to bacterium	BP	0.612965	BP response to bacterium
GO:0004185	0.0244055	0.99143	8	102	serine-type carboxypeptidase activity	MF	0.619554	MF serine-type carboxypeptidase activity
GO:0072593	0.0244803	0.988405	14	241	reactive oxygen species metabolic process	BP	0.620232	BP reactive oxygen species metabolic process
GO:0000910	0.02484	0.991266	8	96	cytokinesis	BP	0.628111	BP cytokinesis
GO:0016209	0.0249137	0.987201	17	317	antioxidant activity	MF	0.628743	MF antioxidant activity
GO:0016122	0.0252306	0.995083	4	31	xanthophyll metabolic process	BP	0.635497	BP xanthophyll metabolic process
GO:0043226	0.0253919	0.977641	675	18429	organelle	CC	0.638312	CC organelle
GO:0080079	0.0254548	0.998411	2	7	cellobiose glucosidase activity	MF	0.638647	MF cellobiose glucosidase activity
GO:0006006	0.0259892	0.98888	11	199	glucose metabolic process	BP	0.648234	BP glucose metabolic process
GO:0010189	0.026038	0.994864	4	32	vitamin E biosynthetic process	BP	0.648234	BP vitamin E biosynthetic process
GO:0042360	0.026038	0.994864	4	32	vitamin E metabolic process	BP	0.648234	BP vitamin E metabolic process
GO:0042362	0.026038	0.994864	4	32	fat-soluble vitamin biosynthetic process	BP	0.648234	BP fat-soluble vitamin biosynthetic process
GO:0000796	0.0262908	0.998538	2	5	condensin complex	CC	0.653269	CC condensin complex
GO:0006949	0.0263545	0.994675	4	44	syncytium formation	BP	0.653591	BP syncytium formation
GO:0071493	0.026703	0.99829	2	7	cellular response to UV-B	BP	0.660963	BP cellular response to UV-B
GO:0044115	0.0268957	0.998358	2	6	development of symbiont involved in interaction with host	BP	0.664458	BP development of symbiont involved in interaction with host
GO:0007017	0.0269775	0.984126	25	470	microtubule-based process	BP	0.665205	BP microtubule-based process
GO:0016702	0.0270578	0.991081	7	100	oxidoreductase activity, acting on single donors with incorporation of molecular oxygen, incorporation of two atoms of oxygen	MF	0.665911	MF oxidoreductase activity, acting on single donors with incorporation of molecular oxygen, incorporation of two atoms of oxygen
GO:0080184	0.0272693	0.998233	2	7	response to phenylpropanoid	BP	0.669837	BP response to phenylpropanoid
GO:0019136	0.027335	0.998161	2	8	deoxynucleoside kinase activity	MF	0.670176	MF deoxynucleoside kinase activity
GO:0001763	0.0274419	0.991888	6	81	morphogenesis of a branching structure	BP	0.671519	BP morphogenesis of a branching structure
GO:0043229	0.0277096	0.975557	672	18363	intracellular organelle	CC	0.676787	CC intracellular organelle
GO:0010359	0.0278698	0.992938	5	53	regulation of anion channel activity	BP	0.679413	BP regulation of anion channel activity
GO:0042537	0.0282014	0.991663	6	69	benzene-containing compound metabolic process	BP	0.68589	BP benzene-containing compound metabolic process
GO:0008299	0.0282553	0.983925	22	423	isoprenoid biosynthetic process	BP	0.68589	BP isoprenoid biosynthetic process
GO:0018904	0.0282959	0.989744	8	116	ether metabolic process	BP	0.68589	BP ether metabolic process
GO:0004332	0.0283483	0.995946	3	21	fructose-bisphosphate aldolase activity	MF	0.68589	MF fructose-bisphosphate aldolase activity
GO:0022613	0.0285251	0.988283	10	134	ribonucleoprotein complex biogenesis	BP	0.688876	BP ribonucleoprotein complex biogenesis
GO:0048653	0.0286411	0.991543	6	62	anther development	BP	0.690383	BP anther development
GO:0042973	0.0288082	0.988813	9	117	glucan endo-1,3-beta-D-glucosidase activity	MF	0.692542	MF glucan endo-1,3-beta-D-glucosidase activity
GO:0016682	0.028838	0.989486	8	126	oxidoreductase activity, acting on diphenols and related substances as donors, oxygen as acceptor	MF	0.692542	MF oxidoreductase activity, acting on diphenols and related substances as donors, oxygen as acceptor
GO:0032993	0.0292358	0.986772	12	187	protein-DNA complex	CC	0.700791	CC protein-DNA complex
GO:0048730	0.0294378	0.997939	2	8	epidermis morphogenesis	BP	0.704322	BP epidermis morphogenesis
GO:0044111	0.0296025	0.997995	2	7	development involved in symbiotic interaction	BP	0.706951	BP development involved in symbiotic interaction
GO:1901031	0.0296717	0.997913	2	8	regulation of response to reactive oxygen species	BP	0.707294	BP regulation of response to reactive oxygen species
GO:0048281	0.029796	0.998077	2	6	inflorescence morphogenesis	BP	0.708946	BP inflorescence morphogenesis
GO:0010600	0.0302733	0.99803	2	6	regulation of auxin biosynthetic process	BP	0.718978	BP regulation of auxin biosynthetic process
GO:0009414	0.0304623	0.980964	30	566	response to water deprivation	BP	0.722135	BP response to water deprivation
GO:0047196	0.0306874	0.991968	5	62	long-chain-alcohol O-fatty-acyltransferase activity	MF	0.726137	MF long-chain-alcohol O-fatty-acyltransferase activity
GO:0016679	0.031197	0.987637	9	149	oxidoreductase activity, acting on diphenols and related substances as donors	MF	0.736844	MF oxidoreductase activity, acting on diphenols and related substances as donors
GO:0003871	0.0315115	0.995264	3	23	5-methyltetrahydropteroyltriglutamate-homocysteine S-methyltransferase activity	MF	0.741555	MF 5-methyltetrahydropteroyltriglutamate-homocysteine S-methyltransferase activity
GO:0042085	0.0315115	0.995264	3	23	5-methyltetrahydropteroyltri-L-glutamate-dependent methyltransferase activity	MF	0.741555	MF 5-methyltetrahydropteroyltri-L-glutamate-dependent methyltransferase activity
GO:0044712	0.0316076	0.975766	88	2234	single-organism catabolic process	BP	0.742462	BP single-organism catabolic process
GO:0009506	0.0318165	0.976137	75	1819	plasmodesma	CC	0.746011	CC plasmodesma
GO:0004565	0.032051	0.988105	8	116	beta-galactosidase activity	MF	0.750144	MF beta-galactosidase activity
GO:0009944	0.0325935	0.991506	5	42	polarity specification of adaxial/abaxial axis	BP	0.761461	BP polarity specification of adaxial/abaxial axis
GO:0044237	0.0330577	0.970721	739	20595	cellular metabolic process	BP	0.770908	BP cellular metabolic process
GO:0010731	0.0334612	0.997322	2	11	protein glutathionylation	BP	0.776891	BP protein glutathionylation
GO:0008705	0.0335149	0.997482	2	8	methionine synthase activity	MF	0.776891	MF methionine synthase activity
GO:0042084	0.0335149	0.997482	2	8	5-methyltetrahydrofolate-dependent methyltransferase activity	MF	0.776891	MF 5-methyltetrahydrofolate-dependent methyltransferase activity
GO:0016899	0.0335552	0.992823	4	33	oxidoreductase activity, acting on the CH-OH group of donors, oxygen as acceptor	MF	0.776891	MF oxidoreductase activity, acting on the CH-OH group of donors, oxygen as acceptor
GO:0045430	0.033813	0.997538	2	7	chalcone isomerase activity	MF	0.779939	MF chalcone isomerase activity
GO:0010291	0.0338654	0.997317	2	10	carotene beta-ring hydroxylase activity	MF	0.779939	MF carotene beta-ring hydroxylase activity
GO:0006775	0.0338683	0.992705	4	35	fat-soluble vitamin metabolic process	BP	0.779939	BP fat-soluble vitamin metabolic process
GO:0006414	0.0340696	0.989443	6	75	translational elongation	BP	0.783176	BP translational elongation
GO:0048609	0.0343395	0.981341	18	308	multicellular organismal reproductive process	BP	0.786945	BP multicellular organismal reproductive process
GO:0044723	0.0343585	0.973892	80	1953	single-organism carbohydrate metabolic process	BP	0.786945	BP single-organism carbohydrate metabolic process
GO:0032365	0.0344166	0.994749	3	19	intracellular lipid transport	BP	0.786945	BP intracellular lipid transport
GO:0015801	0.0344885	0.994654	3	22	aromatic amino acid transport	BP	0.787191	BP aromatic amino acid transport
GO:0009056	0.0347625	0.971743	142	3685	catabolic process	BP	0.79001	BP catabolic process
GO:0019722	0.0349181	0.987934	7	84	calcium-mediated signaling	BP	0.79001	BP calcium-mediated signaling
GO:0016744	0.0350778	0.99046	5	67	transferase activity, transferring aldehyde or ketonic groups	MF	0.79001	MF transferase activity, transferring aldehyde or ketonic groups
GO:0015146	0.0353471	0.997496	2	6	pentose transmembrane transporter activity	MF	0.79001	MF pentose transmembrane transporter activity
GO:0015148	0.0353471	0.997496	2	6	D-xylose transmembrane transporter activity	MF	0.79001	MF D-xylose transmembrane transporter activity
GO:0015575	0.0353471	0.997496	2	6	mannitol transmembrane transporter activity	MF	0.79001	MF mannitol transmembrane transporter activity
GO:0015576	0.0353471	0.997496	2	6	sorbitol transmembrane transporter activity	MF	0.79001	MF sorbitol transmembrane transporter activity
GO:0015591	0.0353471	0.997496	2	6	D-ribose transmembrane transporter activity	MF	0.79001	MF D-ribose transmembrane transporter activity
GO:0015750	0.0353471	0.997496	2	6	pentose transport	BP	0.79001	BP pentose transport
GO:0015752	0.0353471	0.997496	2	6	D-ribose transport	BP	0.79001	BP D-ribose transport
GO:0015753	0.0353471	0.997496	2	6	D-xylose transport	BP	0.79001	BP D-xylose transport
GO:0015795	0.0353471	0.997496	2	6	sorbitol transport	BP	0.79001	BP sorbitol transport
GO:0040034	0.0354502	0.987809	7	69	regulation of development, heterochronic	BP	0.790945	BP regulation of development, heterochronic
GO:0006995	0.0361301	0.994198	3	27	cellular response to nitrogen starvation	BP	0.804721	BP cellular response to nitrogen starvation
GO:0031176	0.0362414	0.997397	2	6	endo-1,4-beta-xylanase activity	MF	0.805808	MF endo-1,4-beta-xylanase activity
GO:0065001	0.0364511	0.990198	5	43	specification of axis polarity	BP	0.809027	BP specification of axis polarity
GO:0016672	0.0365743	0.997039	2	9	oxidoreductase activity, acting on a sulfur group of donors, quinone or similar compound as acceptor	MF	0.809027	MF oxidoreductase activity, acting on a sulfur group of donors, quinone or similar compound as acceptor
GO:0045174	0.0365743	0.997039	2	9	glutathione dehydrogenase (ascorbate) activity	MF	0.809027	MF glutathione dehydrogenase (ascorbate) activity
GO:0016701	0.0366891	0.984997	9	169	oxidoreductase activity, acting on single donors with incorporation of molecular oxygen	MF	0.810176	MF oxidoreductase activity, acting on single donors with incorporation of molecular oxygen
GO:0018580	0.0373948	0.997123	2	7	nitronate monooxygenase activity	MF	0.824348	MF nitronate monooxygenase activity
GO:0007076	0.0377783	0.99415	3	16	mitotic chromosome condensation	BP	0.831381	BP mitotic chromosome condensation
GO:0000912	0.0379062	0.994031	3	18	assembly of actomyosin apparatus involved in cytokinesis	BP	0.832774	BP assembly of actomyosin apparatus involved in cytokinesis
GO:0006816	0.0384103	0.986414	7	92	calcium ion transport	BP	0.842413	BP calcium ion transport
GO:0015797	0.0385806	0.99698	2	7	mannitol transport	BP	0.844712	BP mannitol transport
GO:0031109	0.0389087	0.99694	2	7	microtubule polymerization or depolymerization	BP	0.849616	BP microtubule polymerization or depolymerization
GO:0046983	0.0389363	0.974099	36	664	protein dimerization activity	MF	0.849616	MF protein dimerization activity
GO:0005088	0.0390779	0.989151	5	55	Ras guanyl-nucleotide exchange factor activity	MF	0.851265	MF Ras guanyl-nucleotide exchange factor activity
GO:0071555	0.0392502	0.977901	19	387	cell wall organization	BP	0.853576	BP cell wall organization
GO:0009415	0.0394928	0.974758	30	578	response to water	BP	0.855966	BP response to water
GO:0004659	0.0394928	0.987364	6	70	prenyltransferase activity	MF	0.855966	MF prenyltransferase activity
GO:0006334	0.040006	0.983424	9	151	nucleosome assembly	BP	0.865633	BP nucleosome assembly
GO:0008757	0.0402214	0.97775	18	298	S-adenosylmethionine-dependent methyltransferase activity	MF	0.868837	MF S-adenosylmethionine-dependent methyltransferase activity
GO:0061062	0.0406703	0.996602	2	8	regulation of nematode larval development	BP	0.877064	BP regulation of nematode larval development
GO:0050643	0.0408086	1	1	1	10-deacetylbaccatin III 10-O-acetyltransferase activity	MF	0.878578	MF 10-deacetylbaccatin III 10-O-acetyltransferase activity
GO:0048312	0.0414318	0.996627	2	7	intracellular distribution of mitochondria	BP	0.890507	BP intracellular distribution of mitochondria
GO:0009707	0.0417619	0.984991	7	87	chloroplast outer membrane	CC	0.89611	CC chloroplast outer membrane
GO:0016559	0.0418596	0.99297	3	23	peroxisome fission	BP	0.896714	BP peroxisome fission
GO:0045596	0.0423426	0.981384	10	146	negative regulation of cell differentiation	BP	0.905556	BP negative regulation of cell differentiation
GO:0004559	0.0432325	0.989962	4	34	alpha-mannosidase activity	MF	0.923058	MF alpha-mannosidase activity
GO:0070008	0.0440649	0.982614	8	114	serine-type exopeptidase activity	MF	0.939275	MF serine-type exopeptidase activity
GO:0004455	0.0441654	0.996035	2	9	ketol-acid reductoisomerase activity	MF	0.939863	MF ketol-acid reductoisomerase activity
GO:0032366	0.0442685	0.996021	2	9	intracellular sterol transport	BP	0.940505	BP intracellular sterol transport
GO:0009739	0.0446034	0.977763	13	219	response to gibberellin	BP	0.944919	BP response to gibberellin
GO:0048509	0.0446388	0.977128	14	218	regulation of meristem development	BP	0.944919	BP regulation of meristem development
GO:0015035	0.0447622	0.979204	11	176	protein disulfide oxidoreductase activity	MF	0.944919	MF protein disulfide oxidoreductase activity
GO:0009055	0.0447694	0.975312	17	344	electron carrier activity	MF	0.944919	MF electron carrier activity
GO:0000819	0.0449085	0.996177	2	7	sister chromatid segregation	BP	0.946308	BP sister chromatid segregation
GO:0009780	0.0450317	1	1	1	photosynthetic NADP+ reduction	BP	0.947355	BP photosynthetic NADP+ reduction
GO:0033808	0.0457536	1	1	1	6'-deoxychalcone synthase activity	MF	0.960975	MF 6'-deoxychalcone synthase activity
GO:0004351	0.0459459	0.995784	2	9	glutamate decarboxylase activity	MF	0.963445	MF glutamate decarboxylase activity
GO:0009527	0.046104	0.98306	7	89	plastid outer membrane	CC	0.965191	CC plastid outer membrane
GO:0010598	0.0463852	1	1	1	NAD(P)H dehydrogenase complex (plastoquinone)	CC	0.969503	CC NAD(P)H dehydrogenase complex (plastoquinone)
GO:2000895	0.0472696	0.99586	2	7	hemicellulose catabolic process	BP	0.984795	BP hemicellulose catabolic process
GO:2000899	0.0472696	0.99586	2	7	xyloglucan catabolic process	BP	0.984795	BP xyloglucan catabolic process
GO:0009059	0.0473857	0.959555	227	5767	macromolecule biosynthetic process	BP	0.985051	BP macromolecule biosynthetic process
GO:0004708	0.0474881	0.995678	2	8	MAP kinase kinase activity	MF	0.985051	MF MAP kinase kinase activity
GO:0080165	0.047511	0.995201	2	15	callose deposition in phloem sieve plate	BP	0.985051	BP callose deposition in phloem sieve plate
GO:0071424	0.0477662	1	1	1	rRNA (cytosine-N4-)-methyltransferase activity	MF	0.988753	MF rRNA (cytosine-N4-)-methyltransferase activity
GO:0010038	0.0481021	0.966395	42	942	response to metal ion	BP	0.99411	BP response to metal ion
GO:0051707	0.0481839	0.963267	72	1717	response to other organism	BP	0.994208	BP response to other organism
GO:0015168	0.048306	0.995718	2	7	glycerol transmembrane transporter activity	MF	0.995135	MF glycerol transmembrane transporter activity
GO:0000827	0.048633	0.995395	2	9	inositol-1,3,4,5,6-pentakisphosphate kinase activity	MF	0.998679	MF inositol-1,3,4,5,6-pentakisphosphate kinase activity
GO:0033857	0.048633	0.995395	2	9	diphosphoinositol-pentakisphosphate kinase activity	MF	0.998679	MF diphosphoinositol-pentakisphosphate kinase activity
GO:0009524	0.0488639	0.973343	16	292	phragmoplast	CC	1	CC phragmoplast
GO:0052579	0.0489599	1	1	1	(+)-pulegone reductase, (+)-isomenthone as substrate, activity	MF	1	MF (+)-pulegone reductase, (+)-isomenthone as substrate, activity
GO:0052580	0.0489599	1	1	1	(+)-pulegone reductase, (-)-menthone as substrate, activity	MF	1	MF (+)-pulegone reductase, (-)-menthone as substrate, activity
GO:0044262	0.0493223	0.964032	53	1258	cellular carbohydrate metabolic process	BP	1	BP cellular carbohydrate metabolic process
GO:0002218	0.0495058	0.980022	8	112	activation of innate immune response	BP	1	BP activation of innate immune response
GO:0003013	0.0495806	0.995014	2	12	circulatory system process	BP	1	BP circulatory system process
GO:0016872	0.0497135	0.99097	3	26	intramolecular lyase activity	MF	1	MF intramolecular lyase activity
GO:0019628	0.0499602	0.9951	2	10	urate catabolic process	BP	1	BP urate catabolic process
GO:0046415	0.0499602	0.9951	2	10	urate metabolic process	BP	1	BP urate metabolic process

## Sheet: cluster_4
Gene Ontology (GO) annotations for each cluster of differentially expressed genes
numDEInCat - number of differentially expressed genes in the category
numInCat = number of total genes annotated in this category
Ontologies include: Biological Process (BP), Molecular Function (MF), and Cellular Component (CC)
Cluster 10 includes genes up-regulated in linalool+ plants, including transcripts annotated as putative (R)-(-)-linalool synthase
category	over_represented_pvalue	under_represented_pvalue	numDEInCat	numInCat	term	ontology	over_represented_FDR	go_term
GO:0016054	5.38752e-13	1	28	393	organic acid catabolic process	BP	3.47387e-09	BP organic acid catabolic process
GO:0046395	5.38752e-13	1	28	393	carboxylic acid catabolic process	BP	3.47387e-09	BP carboxylic acid catabolic process
GO:0009702	3.40285e-12	1	8	14	L-arabinokinase activity	MF	1.46277e-08	MF L-arabinokinase activity
GO:0044282	5.08015e-11	1	30	544	small molecule catabolic process	BP	1.63784e-07	BP small molecule catabolic process
GO:1901606	3.7637e-10	1	18	188	alpha-amino acid catabolic process	BP	9.70734e-07	BP alpha-amino acid catabolic process
GO:0009063	2.19549e-09	1	18	220	cellular amino acid catabolic process	BP	4.71885e-06	BP cellular amino acid catabolic process
GO:0010036	1.11058e-08	1	8	27	response to boron-containing substance	BP	2.046e-05	BP response to boron-containing substance
GO:0005452	4.16555e-08	1	7	24	inorganic anion exchanger activity	MF	6.71486e-05	MF inorganic anion exchanger activity
GO:0006551	7.20228e-08	1	9	62	leucine metabolic process	BP	0.000103201	BP leucine metabolic process
GO:0006552	1.138e-07	1	6	17	leucine catabolic process	BP	0.000146757	BP leucine catabolic process
GO:0046835	4.78882e-07	1	9	64	carbohydrate phosphorylation	BP	0.000561424	BP carbohydrate phosphorylation
GO:0009083	5.90774e-07	1	7	37	branched-chain amino acid catabolic process	BP	0.000634885	BP branched-chain amino acid catabolic process
GO:0003863	1.16746e-06	1	5	21	3-methyl-2-oxobutanoate dehydrogenase (2-methylpropanoyl-transferring) activity	MF	0.00107676	MF 3-methyl-2-oxobutanoate dehydrogenase (2-methylpropanoyl-transferring) activity
GO:0019200	1.16894e-06	1	11	116	carbohydrate kinase activity	MF	0.00107676	MF carbohydrate kinase activity
GO:0006559	1.61484e-06	1	7	43	L-phenylalanine catabolic process	BP	0.00130156	BP L-phenylalanine catabolic process
GO:1902222	1.61484e-06	1	7	43	erythrose 4-phosphate/phosphoenolpyruvate family amino acid catabolic process	BP	0.00130156	BP erythrose 4-phosphate/phosphoenolpyruvate family amino acid catabolic process
GO:0044248	1.94126e-06	0.999999	63	2240	cellular catabolic process	BP	0.00144295	BP cellular catabolic process
GO:0044712	2.01404e-06	0.999999	60	2234	single-organism catabolic process	BP	0.00144295	BP single-organism catabolic process
GO:0009081	2.33369e-06	1	10	118	branched-chain amino acid metabolic process	BP	0.00158396	BP branched-chain amino acid metabolic process
GO:0015291	2.78674e-06	0.999999	30	775	secondary active transmembrane transporter activity	MF	0.00179689	MF secondary active transmembrane transporter activity
GO:0006820	3.18054e-06	0.999999	30	782	anion transport	BP	0.00195316	BP anion transport
GO:0005759	3.48738e-06	0.999999	14	208	mitochondrial matrix	CC	0.00204424	CC mitochondrial matrix
GO:0009056	3.66135e-06	0.999998	88	3685	catabolic process	BP	0.0020529	BP catabolic process
GO:0071365	4.20731e-06	0.999999	23	540	cellular response to auxin stimulus	BP	0.00226073	BP cellular response to auxin stimulus
GO:0006558	5.19423e-06	1	8	71	L-phenylalanine metabolic process	BP	0.00257634	BP L-phenylalanine metabolic process
GO:1902221	5.19423e-06	1	8	71	erythrose 4-phosphate/phosphoenolpyruvate family amino acid metabolic process	BP	0.00257634	BP erythrose 4-phosphate/phosphoenolpyruvate family amino acid metabolic process
GO:0009691	5.98392e-06	1	7	47	cytokinin biosynthetic process	BP	0.00269784	BP cytokinin biosynthetic process
GO:0009734	6.10308e-06	0.999998	22	517	auxin-activated signaling pathway	BP	0.00269784	BP auxin-activated signaling pathway
GO:0003939	6.24374e-06	1	3	4	L-iditol 2-dehydrogenase activity	MF	0.00269784	MF L-iditol 2-dehydrogenase activity
GO:0006833	6.276e-06	0.999999	9	103	water transport	BP	0.00269784	BP water transport
GO:0042044	6.48603e-06	0.999999	9	104	fluid transport	BP	0.00269819	BP fluid transport
GO:0044242	7.1654e-06	0.999999	13	232	cellular lipid catabolic process	BP	0.00288766	BP cellular lipid catabolic process
GO:0010167	1.09139e-05	0.999999	7	55	response to nitrate	BP	0.00426503	BP response to nitrate
GO:0009074	1.28141e-05	0.999999	7	55	aromatic amino acid family catabolic process	BP	0.00486029	BP aromatic amino acid family catabolic process
GO:0008509	1.36036e-05	0.999995	25	641	anion transmembrane transporter activity	MF	0.00496742	MF anion transmembrane transporter activity
GO:1901575	1.40985e-05	0.999992	79	3315	organic substance catabolic process	BP	0.00496742	BP organic substance catabolic process
GO:0015103	1.45775e-05	0.999997	14	243	inorganic anion transmembrane transporter activity	MF	0.00496742	MF inorganic anion transmembrane transporter activity
GO:1901605	1.47649e-05	0.999994	29	894	alpha-amino acid metabolic process	BP	0.00496742	BP alpha-amino acid metabolic process
GO:0004622	1.50224e-05	0.999999	5	17	lysophospholipase activity	MF	0.00496742	MF lysophospholipase activity
GO:0015706	1.69298e-05	0.999998	8	89	nitrate transport	BP	0.00545815	BP nitrate transport
GO:0015112	1.75369e-05	0.999998	8	90	nitrate transmembrane transporter activity	MF	0.005516	MF nitrate transmembrane transporter activity
GO:0080138	2.37266e-05	1	3	5	borate uptake transmembrane transporter activity	MF	0.00728521	MF borate uptake transmembrane transporter activity
GO:0015301	2.74681e-05	0.999997	7	57	anion:anion antiporter activity	MF	0.00823788	MF anion:anion antiporter activity
GO:0015698	2.97881e-05	0.999993	15	300	inorganic anion transport	BP	0.00873064	BP inorganic anion transport
GO:0005222	3.06222e-05	1	3	4	intracellular cAMP activated cation channel activity	MF	0.00877564	MF intracellular cAMP activated cation channel activity
GO:0033897	3.20493e-05	0.999999	4	12	ribonuclease T2 activity	MF	0.00884854	MF ribonuclease T2 activity
GO:0006572	3.22489e-05	0.999999	4	14	tyrosine catabolic process	BP	0.00884854	BP tyrosine catabolic process
GO:0043617	3.64092e-05	0.999999	4	18	cellular response to sucrose starvation	BP	0.00978194	BP cellular response to sucrose starvation
GO:0015293	3.81144e-05	0.999989	17	376	symporter activity	MF	0.0100311	MF symporter activity
GO:0016799	4.2421e-05	0.999995	8	91	hydrolase activity, hydrolyzing N-glycosyl compounds	MF	0.0109412	MF hydrolase activity, hydrolyzing N-glycosyl compounds
GO:0072329	4.49935e-05	0.999992	10	173	monocarboxylic acid catabolic process	BP	0.0113772	BP monocarboxylic acid catabolic process
GO:0009690	6.46899e-05	0.999991	8	100	cytokinin metabolic process	BP	0.0157941	BP cytokinin metabolic process
GO:0016710	6.49105e-05	0.999999	3	6	trans-cinnamate 4-monooxygenase activity	MF	0.0157941	MF trans-cinnamate 4-monooxygenase activity
GO:0048439	6.82109e-05	0.999999	3	6	flower morphogenesis	BP	0.0162898	BP flower morphogenesis
GO:0004485	7.09071e-05	0.999999	3	6	methylcrotonoyl-CoA carboxylase activity	MF	0.0166258	MF methylcrotonoyl-CoA carboxylase activity
GO:0009646	8.87539e-05	0.999992	6	58	response to absence of light	BP	0.0202713	BP response to absence of light
GO:0016459	8.95988e-05	0.999987	8	101	myosin complex	CC	0.0202713	CC myosin complex
GO:0016892	0.000101547	0.999996	4	15	endoribonuclease activity, producing 3'-phosphomonoesters	MF	0.0225786	MF endoribonuclease activity, producing 3'-phosphomonoesters
GO:0016894	0.000130774	0.999995	4	16	endonuclease activity, active with either ribo- or deoxyribonucleic acids and producing 3'-phosphomonoesters	MF	0.0285377	MF endonuclease activity, active with either ribo- or deoxyribonucleic acids and producing 3'-phosphomonoesters
GO:0005372	0.000134987	0.999986	6	69	water transmembrane transporter activity	MF	0.0285377	MF water transmembrane transporter activity
GO:0015250	0.000134987	0.999986	6	69	water channel activity	MF	0.0285377	MF water channel activity
GO:0010434	0.000146788	0.999998	3	7	bract formation	BP	0.030532	BP bract formation
GO:0044699	0.000172903	0.999874	332	19190	single-organism process	BP	0.035393	BP single-organism process
GO:0015563	0.000179645	0.999997	3	8	uptake transmembrane transporter activity	MF	0.0361984	MF uptake transmembrane transporter activity
GO:0010254	0.000187374	0.999996	3	8	nectary development	BP	0.0371749	BP nectary development
GO:0043765	0.000193881	1	2	2	T/G mismatch-specific endonuclease activity	MF	0.0378832	MF T/G mismatch-specific endonuclease activity
GO:0031669	0.000200568	0.999941	15	342	cellular response to nutrient levels	BP	0.0386049	BP cellular response to nutrient levels
GO:0003995	0.000206894	0.99999	4	24	acyl-CoA dehydrogenase activity	MF	0.0392369	MF acyl-CoA dehydrogenase activity
GO:0007263	0.00021819	0.999996	3	7	nitric oxide mediated signal transduction	BP	0.0407793	BP nitric oxide mediated signal transduction
GO:0045543	0.000238713	0.999988	4	20	gibberellin 2-beta-dioxygenase activity	MF	0.0439778	MF gibberellin 2-beta-dioxygenase activity
GO:0006570	0.000246074	0.999988	4	20	tyrosine metabolic process	BP	0.0446953	BP tyrosine metabolic process
GO:0003846	0.000270512	0.999986	4	19	2-acylglycerol O-acyltransferase activity	MF	0.0484518	MF 2-acylglycerol O-acyltransferase activity
GO:0000737	0.000294808	0.999936	10	161	DNA catabolic process, endonucleolytic	BP	0.0517089	BP DNA catabolic process, endonucleolytic
GO:0031667	0.000296717	0.999898	18	469	response to nutrient levels	BP	0.0517089	BP response to nutrient levels
GO:0043436	0.000302496	0.99982	67	3154	oxoacid metabolic process	BP	0.0520132	BP oxoacid metabolic process
GO:0006082	0.000345638	0.999794	67	3166	organic acid metabolic process	BP	0.0573504	BP organic acid metabolic process
GO:0019395	0.000358127	0.999937	8	152	fatty acid oxidation	BP	0.0573504	BP fatty acid oxidation
GO:0016042	0.000365432	0.999863	20	624	lipid catabolic process	BP	0.0573504	BP lipid catabolic process
GO:0016624	0.000365988	0.999967	5	47	oxidoreductase activity, acting on the aldehyde or oxo group of donors, disulfide as acceptor	MF	0.0573504	MF oxidoreductase activity, acting on the aldehyde or oxo group of donors, disulfide as acceptor
GO:0004760	0.0003689	1	2	2	serine-pyruvate transaminase activity	MF	0.0573504	MF serine-pyruvate transaminase activity
GO:0050281	0.0003689	1	2	2	serine-glyoxylate transaminase activity	MF	0.0573504	MF serine-glyoxylate transaminase activity
GO:0005217	0.00037356	0.999991	3	8	intracellular ligand-gated ion channel activity	MF	0.0573504	MF intracellular ligand-gated ion channel activity
GO:0005221	0.00037356	0.999991	3	8	intracellular cyclic nucleotide activated cation channel activity	MF	0.0573504	MF intracellular cyclic nucleotide activated cation channel activity
GO:0043855	0.00037356	0.999991	3	8	cyclic nucleotide-gated ion channel activity	MF	0.0573504	MF cyclic nucleotide-gated ion channel activity
GO:0031974	0.000448624	0.999845	17	443	membrane-enclosed lumen	CC	0.0680642	CC membrane-enclosed lumen
GO:0006635	0.000474673	0.999925	7	125	fatty acid beta-oxidation	BP	0.0711788	BP fatty acid beta-oxidation
GO:0034480	0.000509912	0.999998	2	3	phosphatidylcholine phospholipase C activity	MF	0.0755842	MF phosphatidylcholine phospholipase C activity
GO:0022891	0.000544807	0.999692	51	2133	substrate-specific transmembrane transporter activity	MF	0.076495	MF substrate-specific transmembrane transporter activity
GO:0004520	0.000545505	0.999872	10	172	endodeoxyribonuclease activity	MF	0.076495	MF endodeoxyribonuclease activity
GO:0009733	0.000545989	0.99976	26	855	response to auxin	BP	0.076495	BP response to auxin
GO:0070013	0.000548563	0.999823	15	361	intracellular organelle lumen	CC	0.076495	CC intracellular organelle lumen
GO:0009800	0.000551647	0.999964	4	27	cinnamic acid biosynthetic process	BP	0.076495	BP cinnamic acid biosynthetic process
GO:0009803	0.000551647	0.999964	4	27	cinnamic acid metabolic process	BP	0.076495	BP cinnamic acid metabolic process
GO:0030048	0.000582313	0.999923	6	66	actin filament-based movement	BP	0.0786158	BP actin filament-based movement
GO:0009062	0.00058575	0.999904	7	132	fatty acid catabolic process	BP	0.0786158	BP fatty acid catabolic process
GO:0042807	0.000595351	0.99998	3	15	central vacuole	CC	0.0786158	CC central vacuole
GO:0034754	0.000597054	0.999886	8	137	cellular hormone metabolic process	BP	0.0786158	BP cellular hormone metabolic process
GO:0009611	0.000597422	0.999789	17	473	response to wounding	BP	0.0786158	BP response to wounding
GO:0006308	0.000607743	0.999856	10	177	DNA catabolic process	BP	0.0791662	BP DNA catabolic process
GO:0080187	0.000617426	0.999996	2	4	floral organ senescence	BP	0.0796232	BP floral organ senescence
GO:0004657	0.00063612	0.999997	2	3	proline dehydrogenase activity	MF	0.0812218	MF proline dehydrogenase activity
GO:0001171	0.00066234	0.999873	8	112	reverse transcription	BP	0.0813479	BP reverse transcription
GO:0009036	0.00066234	0.999873	8	112	Type II site-specific deoxyribonuclease activity	MF	0.0813479	MF Type II site-specific deoxyribonuclease activity
GO:0015666	0.00066234	0.999873	8	112	restriction endodeoxyribonuclease activity	MF	0.0813479	MF restriction endodeoxyribonuclease activity
GO:0032199	0.00066234	0.999873	8	112	reverse transcription involved in RNA-mediated transposition	BP	0.0813479	BP reverse transcription involved in RNA-mediated transposition
GO:0004536	0.000706103	0.999829	10	176	deoxyribonuclease activity	MF	0.08558	MF deoxyribonuclease activity
GO:0043233	0.00071007	0.999764	15	375	organelle lumen	CC	0.08558	CC organelle lumen
GO:0008483	0.000738295	0.999854	8	146	transaminase activity	MF	0.0881578	MF transaminase activity
GO:0044550	0.00076503	0.999733	16	438	secondary metabolite biosynthetic process	BP	0.0897619	BP secondary metabolite biosynthetic process
GO:0055114	0.000769032	0.999545	57	2231	oxidation-reduction process	BP	0.0897619	BP oxidation-reduction process
GO:0004084	0.000799077	0.999969	3	19	branched-chain-amino-acid transaminase activity	MF	0.0897619	MF branched-chain-amino-acid transaminase activity
GO:0052654	0.000799077	0.999969	3	19	L-leucine transaminase activity	MF	0.0897619	MF L-leucine transaminase activity
GO:0052655	0.000799077	0.999969	3	19	L-valine transaminase activity	MF	0.0897619	MF L-valine transaminase activity
GO:0052656	0.000799077	0.999969	3	19	L-isoleucine transaminase activity	MF	0.0897619	MF L-isoleucine transaminase activity
GO:0016769	0.000800451	0.99984	8	147	transferase activity, transferring nitrogenous groups	MF	0.0897619	MF transferase activity, transferring nitrogenous groups
GO:0009506	0.00088698	0.999509	44	1819	plasmodesma	CC	0.0979617	CC plasmodesma
GO:0000014	0.000888766	0.999995	2	3	single-stranded DNA endodeoxyribonuclease activity	MF	0.0979617	MF single-stranded DNA endodeoxyribonuclease activity
GO:0052689	0.000907288	0.999655	18	530	carboxylic ester hydrolase activity	MF	0.0991558	MF carboxylic ester hydrolase activity
GO:0034440	0.000941592	0.999806	8	168	lipid oxidation	BP	0.10204	BP lipid oxidation
GO:0006278	0.000963675	0.999803	8	119	RNA-dependent DNA replication	BP	0.103563	BP RNA-dependent DNA replication
GO:0015700	0.00104191	0.99996	3	11	arsenite transport	BP	0.10926	BP arsenite transport
GO:0033530	0.00104498	0.999956	3	16	raffinose metabolic process	BP	0.10926	BP raffinose metabolic process
GO:0034484	0.00104498	0.999956	3	16	raffinose catabolic process	BP	0.10926	BP raffinose catabolic process
GO:0031668	0.00105058	0.999637	15	395	cellular response to extracellular stimulus	BP	0.10926	BP cellular response to extracellular stimulus
GO:0009864	0.00106729	0.999918	4	25	induced systemic resistance, jasmonic acid mediated signaling pathway	BP	0.110111	BP induced systemic resistance, jasmonic acid mediated signaling pathway
GO:0009991	0.00114789	0.999555	18	522	response to extracellular stimulus	BP	0.117485	BP response to extracellular stimulus
GO:0005215	0.00117072	0.999271	65	3000	transporter activity	MF	0.118878	MF transporter activity
GO:0019752	0.0012283	0.999242	62	3042	carboxylic acid metabolic process	BP	0.123751	BP carboxylic acid metabolic process
GO:0005911	0.00147296	0.999163	44	1885	cell-cell junction	CC	0.146349	CC cell-cell junction
GO:0071496	0.00147529	0.999472	15	410	cellular response to external stimulus	BP	0.146349	BP cellular response to external stimulus
GO:1901332	0.00149542	0.999984	2	4	negative regulation of lateral root development	BP	0.14683	BP negative regulation of lateral root development
GO:0003997	0.00150291	0.999927	3	19	acyl-CoA oxidase activity	MF	0.14683	MF acyl-CoA oxidase activity
GO:0006949	0.00155779	0.99986	4	44	syncytium formation	BP	0.151047	BP syncytium formation
GO:0006811	0.00165536	0.999042	46	1884	ion transport	BP	0.159196	BP ion transport
GO:0016888	0.00166652	0.999628	8	130	endodeoxyribonuclease activity, producing 5'-phosphomonoesters	MF	0.159196	MF endodeoxyribonuclease activity, producing 5'-phosphomonoesters
GO:0022857	0.00180504	0.998899	55	2485	transmembrane transporter activity	MF	0.17116	MF transmembrane transporter activity
GO:0004411	0.00191276	0.999971	2	6	homogentisate 1,2-dioxygenase activity	MF	0.17746	MF homogentisate 1,2-dioxygenase activity
GO:1901999	0.00191276	0.999971	2	6	homogentisate metabolic process	BP	0.17746	BP homogentisate metabolic process
GO:1902000	0.00191276	0.999971	2	6	homogentisate catabolic process	BP	0.17746	BP homogentisate catabolic process
GO:0015105	0.00195587	0.999902	3	13	arsenite transmembrane transporter activity	MF	0.179258	MF arsenite transmembrane transporter activity
GO:0003868	0.00195994	0.999972	2	5	4-hydroxyphenylpyruvate dioxygenase activity	MF	0.179258	MF 4-hydroxyphenylpyruvate dioxygenase activity
GO:0004174	0.0020037	0.999975	2	4	electron-transferring-flavoprotein dehydrogenase activity	MF	0.180697	MF electron-transferring-flavoprotein dehydrogenase activity
GO:0016649	0.0020037	0.999975	2	4	oxidoreductase activity, acting on the CH-NH group of donors, quinone or similar compound as acceptor	MF	0.180697	MF oxidoreductase activity, acting on the CH-NH group of donors, quinone or similar compound as acceptor
GO:0009267	0.00203669	0.999346	12	308	cellular response to starvation	BP	0.182336	BP cellular response to starvation
GO:0009699	0.00205195	0.999305	13	338	phenylpropanoid biosynthetic process	BP	0.182336	BP phenylpropanoid biosynthetic process
GO:1901565	0.00206429	0.999017	25	843	organonitrogen compound catabolic process	BP	0.182336	BP organonitrogen compound catabolic process
GO:0044765	0.00212755	0.998575	82	3887	single-organism transport	BP	0.186645	BP single-organism transport
GO:0071804	0.00218513	0.999555	7	94	cellular potassium ion transport	BP	0.189123	BP cellular potassium ion transport
GO:0071805	0.00218513	0.999555	7	94	potassium ion transmembrane transport	BP	0.189123	BP potassium ion transmembrane transport
GO:0035445	0.00225463	0.999878	3	15	borate transmembrane transport	BP	0.191287	BP borate transmembrane transport
GO:0046713	0.00225463	0.999878	3	15	borate transport	BP	0.191287	BP borate transport
GO:0046715	0.00225463	0.999878	3	15	borate transmembrane transporter activity	MF	0.191287	MF borate transmembrane transporter activity
GO:0030054	0.00235546	0.998627	44	1942	cell junction	CC	0.198	CC cell junction
GO:0045548	0.00236445	0.999865	3	20	phenylalanine ammonia-lyase activity	MF	0.198	MF phenylalanine ammonia-lyase activity
GO:0009395	0.00253657	0.999851	3	21	phospholipid catabolic process	BP	0.207869	BP phospholipid catabolic process
GO:0042594	0.00253747	0.999078	14	390	response to starvation	BP	0.207869	BP response to starvation
GO:0006562	0.00256011	0.999958	2	5	proline catabolic process	BP	0.207869	BP proline catabolic process
GO:0010133	0.00256011	0.999958	2	5	proline catabolic process to glutamate	BP	0.207869	BP proline catabolic process to glutamate
GO:0006560	0.00258873	0.999732	4	48	proline metabolic process	BP	0.207869	BP proline metabolic process
GO:0051930	0.00259513	0.999963	2	4	regulation of sensory perception of pain	BP	0.207869	BP regulation of sensory perception of pain
GO:0051931	0.00259513	0.999963	2	4	regulation of sensory perception	BP	0.207869	BP regulation of sensory perception
GO:0042542	0.00264813	0.999173	11	275	response to hydrogen peroxide	BP	0.210804	BP response to hydrogen peroxide
GO:0005242	0.002724	0.999838	3	18	inward rectifier potassium channel activity	MF	0.215514	MF inward rectifier potassium channel activity
GO:0022804	0.00275426	0.998516	33	1338	active transmembrane transporter activity	MF	0.216579	MF active transmembrane transporter activity
GO:0071486	0.0028674	0.999943	2	7	cellular response to high light intensity	BP	0.222795	BP cellular response to high light intensity
GO:0055085	0.00286786	0.998291	46	1871	transmembrane transport	BP	0.222795	BP transmembrane transport
GO:0022892	0.0032017	0.998019	52	2360	substrate-specific transporter activity	MF	0.24724	MF substrate-specific transporter activity
GO:0004620	0.0033032	0.999173	8	155	phospholipase activity	MF	0.25356	MF phospholipase activity
GO:0008964	0.00338799	0.999775	3	25	phosphoenolpyruvate carboxylase activity	MF	0.258529	MF phosphoenolpyruvate carboxylase activity
GO:0007154	0.00352678	0.998569	16	486	cell communication	BP	0.267537	BP cell communication
GO:0009954	0.00370746	0.999749	3	22	proximal/distal pattern formation	BP	0.279599	BP proximal/distal pattern formation
GO:0009072	0.00386682	0.999004	8	168	aromatic amino acid family metabolic process	BP	0.288303	BP aromatic amino acid family metabolic process
GO:0016701	0.00386758	0.999113	7	169	oxidoreductase activity, acting on single donors with incorporation of molecular oxygen	MF	0.288303	MF oxidoreductase activity, acting on single donors with incorporation of molecular oxygen
GO:0009514	0.0039723	0.999369	5	73	glyoxysome	CC	0.292993	CC glyoxysome
GO:0080029	0.00397595	0.999732	3	17	cellular response to boron-containing substance levels	BP	0.292993	BP cellular response to boron-containing substance levels
GO:0044262	0.00401661	0.997826	31	1258	cellular carbohydrate metabolic process	BP	0.294308	BP cellular carbohydrate metabolic process
GO:0048646	0.00414248	0.99829	16	518	anatomical structure formation involved in morphogenesis	BP	0.301816	BP anatomical structure formation involved in morphogenesis
GO:0015977	0.00420198	0.999698	3	26	carbon fixation	BP	0.304431	BP carbon fixation
GO:0009755	0.0043875	0.997497	36	1443	hormone-mediated signaling pathway	BP	0.316096	BP hormone-mediated signaling pathway
GO:0015075	0.00446075	0.997374	40	1726	ion transmembrane transporter activity	MF	0.319588	MF ion transmembrane transporter activity
GO:0009838	0.004818	0.99941	4	43	abscission	BP	0.343276	BP abscission
GO:2000023	0.00497044	0.999876	2	6	regulation of lateral root development	BP	0.352191	BP regulation of lateral root development
GO:0010338	0.0050801	0.999609	3	26	leaf formation	BP	0.357994	BP leaf formation
GO:0032870	0.00515824	0.996981	38	1566	cellular response to hormone stimulus	BP	0.361526	BP cellular response to hormone stimulus
GO:0004121	0.00532441	0.999841	2	10	cystathionine beta-lyase activity	MF	0.371154	MF cystathionine beta-lyase activity
GO:0009308	0.00550707	0.998104	11	296	amine metabolic process	BP	0.380805	BP amine metabolic process
GO:0009099	0.00552191	0.999555	3	32	valine biosynthetic process	BP	0.380805	BP valine biosynthetic process
GO:0070141	0.00559108	0.999833	2	9	response to UV-A	BP	0.381495	BP response to UV-A
GO:0071492	0.00559108	0.999833	2	9	cellular response to UV-A	BP	0.381495	BP cellular response to UV-A
GO:0016328	0.00568407	0.99954	3	29	lateral plasma membrane	CC	0.385799	CC lateral plasma membrane
GO:0004611	0.00578734	0.999528	3	30	phosphoenolpyruvate carboxykinase activity	MF	0.388489	MF phosphoenolpyruvate carboxykinase activity
GO:0009414	0.0057938	0.997384	18	566	response to water deprivation	BP	0.388489	BP response to water deprivation
GO:0006520	0.00583316	0.996791	30	1347	cellular amino acid metabolic process	BP	0.388489	BP cellular amino acid metabolic process
GO:0046503	0.00584421	0.999524	3	28	glycerolipid catabolic process	BP	0.388489	BP glycerolipid catabolic process
GO:0070887	0.00601137	0.996158	52	2334	cellular response to chemical stimulus	BP	0.397552	BP cellular response to chemical stimulus
GO:0009809	0.00621134	0.998451	7	146	lignin biosynthetic process	BP	0.408681	BP lignin biosynthetic process
GO:0080037	0.00641232	0.999794	2	9	negative regulation of cytokinin-activated signaling pathway	BP	0.419763	BP negative regulation of cytokinin-activated signaling pathway
GO:0048577	0.00646487	0.999797	2	8	negative regulation of short-day photoperiodism, flowering	BP	0.421065	BP negative regulation of short-day photoperiodism, flowering
GO:0042445	0.0065791	0.997817	10	267	hormone metabolic process	BP	0.426303	BP hormone metabolic process
GO:0006573	0.0066114	0.999095	4	68	valine metabolic process	BP	0.426303	BP valine metabolic process
GO:0019755	0.00676033	0.999419	3	28	one-carbon compound transport	BP	0.433737	BP one-carbon compound transport
GO:0030795	0.00683657	0.999764	2	11	jasmonate O-methyltransferase activity	MF	0.434899	MF jasmonate O-methyltransferase activity
GO:0031644	0.00687335	0.999797	2	6	regulation of neurological system process	BP	0.434899	BP regulation of neurological system process
GO:2000124	0.00687961	0.999796	2	6	regulation of endocannabinoid signaling pathway	BP	0.434899	BP regulation of endocannabinoid signaling pathway
GO:0009698	0.00704152	0.997123	14	456	phenylpropanoid metabolic process	BP	0.442963	BP phenylpropanoid metabolic process
GO:0042446	0.00718377	0.99816	7	142	hormone biosynthetic process	BP	0.449718	BP hormone biosynthetic process
GO:0030029	0.00723444	0.997738	9	217	actin filament-based process	BP	0.450702	BP actin filament-based process
GO:0009415	0.00729303	0.99663	18	578	response to water	BP	0.452168	BP response to water
GO:0019748	0.00767351	0.99652	17	634	secondary metabolic process	BP	0.472984	BP secondary metabolic process
GO:0019279	0.00772949	0.999715	2	11	L-methionine biosynthetic process from L-homoserine via cystathionine	BP	0.472984	BP L-methionine biosynthetic process from L-homoserine via cystathionine
GO:0034214	0.0077388	0.999743	2	7	protein hexamerization	BP	0.472984	BP protein hexamerization
GO:2000028	0.00780251	0.99889	4	55	regulation of photoperiodism, flowering	BP	0.474628	BP regulation of photoperiodism, flowering
GO:0071495	0.00789978	0.995216	39	1665	cellular response to endogenous stimulus	BP	0.478289	BP cellular response to endogenous stimulus
GO:0046685	0.00795651	0.999282	3	25	response to arsenic-containing substance	BP	0.479138	BP response to arsenic-containing substance
GO:0010582	0.00798811	0.999271	3	28	floral meristem determinacy	BP	0.479138	BP floral meristem determinacy
GO:0009944	0.00806119	0.998858	4	42	polarity specification of adaxial/abaxial axis	BP	0.481283	BP polarity specification of adaxial/abaxial axis
GO:0015297	0.00809976	0.996906	12	349	antiporter activity	MF	0.481357	MF antiporter activity
GO:0032197	0.00854153	0.997053	10	289	transposition, RNA-mediated	BP	0.505283	BP transposition, RNA-mediated
GO:0048235	0.00894513	0.998674	4	58	pollen sperm cell differentiation	BP	0.524538	BP pollen sperm cell differentiation
GO:0065001	0.00894838	0.998692	4	43	specification of axis polarity	BP	0.524538	BP specification of axis polarity
GO:0018812	0.00907923	0.999643	2	10	3-hydroxyacyl-CoA dehydratase activity	MF	0.5298	MF 3-hydroxyacyl-CoA dehydratase activity
GO:0016863	0.00918274	0.99911	3	32	intramolecular oxidoreductase activity, transposing C=C bonds	MF	0.531964	MF intramolecular oxidoreductase activity, transposing C=C bonds
GO:0006813	0.00919883	0.99702	9	189	potassium ion transport	BP	0.531964	BP potassium ion transport
GO:0034432	0.00940618	0.999617	2	11	bis(5'-adenosyl)-pentaphosphatase activity	MF	0.53952	MF bis(5'-adenosyl)-pentaphosphatase activity
GO:0046283	0.00941314	0.99778	6	120	anthocyanin-containing compound metabolic process	BP	0.53952	BP anthocyanin-containing compound metabolic process
GO:0016702	0.00952992	0.998116	5	100	oxidoreductase activity, acting on single donors with incorporation of molecular oxygen, incorporation of two atoms of oxygen	MF	0.543796	MF oxidoreductase activity, acting on single donors with incorporation of molecular oxygen, incorporation of two atoms of oxygen
GO:0010016	0.00965275	0.999065	3	25	shoot system morphogenesis	BP	0.548378	BP shoot system morphogenesis
GO:0060292	0.00972916	0.999636	2	7	long term synaptic depression	BP	0.550295	BP long term synaptic depression
GO:0071705	0.0100151	0.994916	21	793	nitrogen compound transport	BP	0.563993	BP nitrogen compound transport
GO:0008289	0.0102376	0.995101	18	636	lipid binding	MF	0.574017	MF lipid binding
GO:0019310	0.010375	0.999535	2	15	inositol catabolic process	BP	0.576705	BP inositol catabolic process
GO:0050113	0.010375	0.999535	2	15	inositol oxygenase activity	MF	0.576705	MF inositol oxygenase activity
GO:0016645	0.0106351	0.997838	5	106	oxidoreductase activity, acting on the CH-NH group of donors	MF	0.587627	MF oxidoreductase activity, acting on the CH-NH group of donors
GO:0009092	0.0106626	0.99953	2	12	homoserine metabolic process	BP	0.587627	BP homoserine metabolic process
GO:0048167	0.0111685	0.999521	2	9	regulation of synaptic plasticity	BP	0.612892	BP regulation of synaptic plasticity
GO:0009084	0.011226	0.997687	5	106	glutamine family amino acid biosynthetic process	BP	0.613435	BP glutamine family amino acid biosynthetic process
GO:0071266	0.0113687	0.999475	2	13	'de novo' L-methionine biosynthetic process	BP	0.618612	BP 'de novo' L-methionine biosynthetic process
GO:0007565	0.011421	0.999472	2	13	female pregnancy	BP	0.618847	BP female pregnancy
GO:0000322	0.0121621	0.998713	3	26	storage vacuole	CC	0.653861	CC storage vacuole
GO:0016788	0.0121686	0.991171	86	4591	hydrolase activity, acting on ester bonds	MF	0.653861	MF hydrolase activity, acting on ester bonds
GO:0009642	0.0127778	0.995955	8	200	response to light intensity	BP	0.683747	BP response to light intensity
GO:0006810	0.0131504	0.990176	104	5527	transport	BP	0.700776	BP transport
GO:0005662	0.0132178	0.999347	2	12	DNA replication factor A complex	CC	0.701468	CC DNA replication factor A complex
GO:0009753	0.0132796	0.994578	12	381	response to jasmonic acid	BP	0.701862	BP response to jasmonic acid
GO:0006549	0.0135224	0.998472	3	39	isoleucine metabolic process	BP	0.70632	BP isoleucine metabolic process
GO:0009097	0.0135224	0.998472	3	39	isoleucine biosynthetic process	BP	0.70632	BP isoleucine biosynthetic process
GO:0008453	0.0135283	0.999324	2	12	alanine-glyoxylate transaminase activity	MF	0.70632	MF alanine-glyoxylate transaminase activity
GO:0017057	0.0136512	0.999289	2	16	6-phosphogluconolactonase activity	MF	0.70986	MF 6-phosphogluconolactonase activity
GO:0030599	0.0137797	0.99557	8	228	pectinesterase activity	MF	0.713668	MF pectinesterase activity
GO:0016298	0.0138805	0.994852	10	278	lipase activity	MF	0.714895	MF lipase activity
GO:0010022	0.0139143	0.998429	3	32	meristem determinacy	BP	0.714895	BP meristem determinacy
GO:0010817	0.014032	0.993988	13	435	regulation of hormone levels	BP	0.71577	BP regulation of hormone levels
GO:0046459	0.0140591	0.999262	2	15	short-chain fatty acid metabolic process	BP	0.71577	BP short-chain fatty acid metabolic process
GO:0051234	0.0140978	0.989426	105	5602	establishment of localization	BP	0.71577	BP establishment of localization
GO:0004557	0.0142878	0.998357	3	37	alpha-galactosidase activity	MF	0.71975	MF alpha-galactosidase activity
GO:0052692	0.0142878	0.998357	3	37	raffinose alpha-galactosidase activity	MF	0.71975	MF raffinose alpha-galactosidase activity
GO:0009011	0.0144196	0.998361	3	29	starch synthase activity	MF	0.723561	MF starch synthase activity
GO:0009098	0.0147053	0.998274	3	45	leucine biosynthetic process	BP	0.735039	BP leucine biosynthetic process
GO:0022838	0.0148151	0.994443	10	311	substrate-specific channel activity	MF	0.737665	MF substrate-specific channel activity
GO:0033116	0.0149158	0.998283	3	29	endoplasmic reticulum-Golgi intermediate compartment membrane	CC	0.739822	CC endoplasmic reticulum-Golgi intermediate compartment membrane
GO:0042221	0.0151596	0.988725	96	5122	response to chemical	BP	0.749034	BP response to chemical
GO:0010285	0.0154198	0.999144	2	16	L,L-diaminopimelate aminotransferase activity	MF	0.758986	MF L,L-diaminopimelate aminotransferase activity
GO:0019336	0.0156742	0.999108	2	19	phenol-containing compound catabolic process	BP	0.768572	BP phenol-containing compound catabolic process
GO:0042803	0.0162932	0.993165	12	355	protein homodimerization activity	MF	0.795898	MF protein homodimerization activity
GO:0080044	0.0164679	0.997993	3	41	quercetin 7-O-glucosyltransferase activity	MF	0.797957	MF quercetin 7-O-glucosyltransferase activity
GO:0008271	0.0164993	0.998011	3	33	secondary active sulfate transmembrane transporter activity	MF	0.797957	MF secondary active sulfate transmembrane transporter activity
GO:0016567	0.0166866	0.990364	27	1040	protein ubiquitination	BP	0.797957	BP protein ubiquitination
GO:0004165	0.0167066	0.999027	2	17	dodecenoyl-CoA delta-isomerase activity	MF	0.797957	MF dodecenoyl-CoA delta-isomerase activity
GO:0008692	0.0167066	0.999027	2	17	3-hydroxybutyryl-CoA epimerase activity	MF	0.797957	MF 3-hydroxybutyryl-CoA epimerase activity
GO:0016856	0.0167066	0.999027	2	17	racemase and epimerase activity, acting on hydroxy acids and derivatives	MF	0.797957	MF racemase and epimerase activity, acting on hydroxy acids and derivatives
GO:0071484	0.0168341	0.999036	2	14	cellular response to light intensity	BP	0.801077	BP cellular response to light intensity
GO:0016053	0.0172112	0.989458	33	1629	organic acid biosynthetic process	BP	0.811026	BP organic acid biosynthetic process
GO:0046394	0.0172112	0.989458	33	1629	carboxylic acid biosynthetic process	BP	0.811026	BP carboxylic acid biosynthetic process
GO:0055046	0.0172474	0.997899	3	30	microgametogenesis	BP	0.811026	BP microgametogenesis
GO:0010252	0.0173256	0.997902	3	27	auxin homeostasis	BP	0.811026	BP auxin homeostasis
GO:0006809	0.0173576	0.998982	2	15	nitric oxide biosynthetic process	BP	0.811026	BP nitric oxide biosynthetic process
GO:0008150	0.0175483	0.986498	523	33631	biological_process	BP	0.814819	BP biological_process
GO:0010227	0.0176103	0.997821	3	34	floral organ abscission	BP	0.814819	BP floral organ abscission
GO:0044429	0.0176283	0.990127	24	1003	mitochondrial part	CC	0.814819	CC mitochondrial part
GO:0016036	0.0177467	0.994565	7	185	cellular response to phosphate starvation	BP	0.817363	BP cellular response to phosphate starvation
GO:0016421	0.0179327	0.997746	3	40	CoA carboxylase activity	MF	0.820072	MF CoA carboxylase activity
GO:0016885	0.0179327	0.997746	3	40	ligase activity, forming carbon-carbon bonds	MF	0.820072	MF ligase activity, forming carbon-carbon bonds
GO:0004629	0.0183873	0.998919	2	12	phospholipase C activity	MF	0.833951	MF phospholipase C activity
GO:0010893	0.0184302	0.999914	1	2	positive regulation of steroid biosynthetic process	BP	0.833951	BP positive regulation of steroid biosynthetic process
GO:2000488	0.0184302	0.999914	1	2	positive regulation of brassinosteroid biosynthetic process	BP	0.833951	BP positive regulation of brassinosteroid biosynthetic process
GO:0030158	0.0186172	0.998954	2	9	protein xylosyltransferase activity	MF	0.839253	MF protein xylosyltransferase activity
GO:0046209	0.0186871	0.998852	2	16	nitric oxide metabolic process	BP	0.839253	BP nitric oxide metabolic process
GO:0048587	0.0187426	0.998855	2	15	regulation of short-day photoperiodism, flowering	BP	0.839253	BP regulation of short-day photoperiodism, flowering
GO:0090447	0.0190443	0.998894	2	10	glycerol-3-phosphate 2-O-acyltransferase activity	MF	0.846882	MF glycerol-3-phosphate 2-O-acyltransferase activity
GO:0045330	0.0190443	0.994737	6	162	aspartyl esterase activity	MF	0.846882	MF aspartyl esterase activity
GO:0060151	0.019285	0.998795	2	16	peroxisome localization	BP	0.851136	BP peroxisome localization
GO:0090436	0.019285	0.998795	2	16	leaf pavement cell development	BP	0.851136	BP leaf pavement cell development
GO:0042537	0.019338	0.996381	4	69	benzene-containing compound metabolic process	BP	0.851136	BP benzene-containing compound metabolic process
GO:0010378	0.0196386	0.998754	2	17	temperature compensation of the circadian clock	BP	0.861425	BP temperature compensation of the circadian clock
GO:0033840	0.0198073	0.998775	2	13	NDP-glucose-starch glucosyltransferase activity	MF	0.865881	MF NDP-glucose-starch glucosyltransferase activity
GO:1901700	0.0202098	0.985845	59	2969	response to oxygen-containing compound	BP	0.88049	BP response to oxygen-containing compound
GO:0009635	0.0204135	0.998686	2	16	response to herbicide	BP	0.886374	BP response to herbicide
GO:0009685	0.0205551	0.995087	5	97	gibberellin metabolic process	BP	0.889161	BP gibberellin metabolic process
GO:0048573	0.0206922	0.994194	6	136	photoperiodism, flowering	BP	0.889161	BP photoperiodism, flowering
GO:0050805	0.0208131	0.998732	2	10	negative regulation of synaptic transmission	BP	0.889161	BP negative regulation of synaptic transmission
GO:0042802	0.0208236	0.989043	19	709	identical protein binding	MF	0.889161	MF identical protein binding
GO:0060867	0.0208914	1	1	1	fruit abscission	BP	0.889161	BP fruit abscission
GO:2000692	0.0208914	1	1	1	negative regulation of seed maturation	BP	0.889161	BP negative regulation of seed maturation
GO:0008889	0.0214321	0.998605	2	14	glycerophosphodiester phosphodiesterase activity	MF	0.894602	MF glycerophosphodiester phosphodiesterase activity
GO:0034498	0.0214335	1	1	1	early endosome to Golgi transport	BP	0.894602	BP early endosome to Golgi transport
GO:0071985	0.0214335	1	1	1	multivesicular body sorting pathway	BP	0.894602	BP multivesicular body sorting pathway
GO:0016841	0.0214646	0.997098	3	45	ammonia-lyase activity	MF	0.894602	MF ammonia-lyase activity
GO:0009718	0.0220088	0.994636	5	105	anthocyanin-containing compound biosynthetic process	BP	0.894602	BP anthocyanin-containing compound biosynthetic process
GO:0019433	0.022121	0.998505	2	17	triglyceride catabolic process	BP	0.894602	BP triglyceride catabolic process
GO:0051645	0.0221301	0.998489	2	19	Golgi localization	BP	0.894602	BP Golgi localization
GO:0000326	0.0224602	0.998489	2	15	protein storage vacuole	CC	0.894602	CC protein storage vacuole
GO:0009416	0.0224878	0.986408	29	1258	response to light stimulus	BP	0.894602	BP response to light stimulus
GO:0050804	0.0226955	0.998508	2	12	modulation of synaptic transmission	BP	0.894602	BP modulation of synaptic transmission
GO:0015267	0.0234348	0.990551	10	329	channel activity	MF	0.894602	MF channel activity
GO:0022803	0.0234348	0.990551	10	329	passive transmembrane transporter activity	MF	0.894602	MF passive transmembrane transporter activity
GO:0003333	0.0235135	0.993221	6	126	amino acid transmembrane transport	BP	0.894602	BP amino acid transmembrane transport
GO:0080167	0.0237972	0.990927	9	289	response to karrikin	BP	0.894602	BP response to karrikin
GO:0016101	0.0238797	0.993069	6	148	diterpenoid metabolic process	BP	0.894602	BP diterpenoid metabolic process
GO:0008277	0.0239427	0.998347	2	14	regulation of G-protein coupled receptor protein signaling pathway	BP	0.894602	BP regulation of G-protein coupled receptor protein signaling pathway
GO:0008083	0.0240716	1	1	1	growth factor activity	MF	0.894602	MF growth factor activity
GO:0002759	0.0240716	1	1	1	regulation of antimicrobial humoral response	BP	0.894602	BP regulation of antimicrobial humoral response
GO:0002784	0.0240716	1	1	1	regulation of antimicrobial peptide production	BP	0.894602	BP regulation of antimicrobial peptide production
GO:0002805	0.0240716	1	1	1	regulation of antimicrobial peptide biosynthetic process	BP	0.894602	BP regulation of antimicrobial peptide biosynthetic process
GO:0002920	0.0240716	1	1	1	regulation of humoral immune response	BP	0.894602	BP regulation of humoral immune response
GO:0007343	0.0240716	1	1	1	egg activation	BP	0.894602	BP egg activation
GO:0007344	0.0240716	1	1	1	pronuclear fusion	BP	0.894602	BP pronuclear fusion
GO:0034248	0.0240716	1	1	1	regulation of cellular amide metabolic process	BP	0.894602	BP regulation of cellular amide metabolic process
GO:0035044	0.0240716	1	1	1	sperm aster formation	BP	0.894602	BP sperm aster formation
GO:0035046	0.0240716	1	1	1	pronuclear migration	BP	0.894602	BP pronuclear migration
GO:0052318	0.0240716	1	1	1	regulation of phytoalexin metabolic process	BP	0.894602	BP regulation of phytoalexin metabolic process
GO:0052319	0.0240716	1	1	1	regulation of phytoalexin biosynthetic process	BP	0.894602	BP regulation of phytoalexin biosynthetic process
GO:0052320	0.0240716	1	1	1	positive regulation of phytoalexin metabolic process	BP	0.894602	BP positive regulation of phytoalexin metabolic process
GO:0052322	0.0240716	1	1	1	positive regulation of phytoalexin biosynthetic process	BP	0.894602	BP positive regulation of phytoalexin biosynthetic process
GO:1901182	0.0240716	1	1	1	regulation of camalexin biosynthetic process	BP	0.894602	BP regulation of camalexin biosynthetic process
GO:1901183	0.0240716	1	1	1	positive regulation of camalexin biosynthetic process	BP	0.894602	BP positive regulation of camalexin biosynthetic process
GO:0009921	0.0240716	1	1	1	auxin efflux carrier complex	CC	0.894602	CC auxin efflux carrier complex
GO:0018858	0.0240716	1	1	1	benzoate-CoA ligase activity	MF	0.894602	MF benzoate-CoA ligase activity
GO:0003853	0.0240716	1	1	1	2-methylacyl-CoA dehydrogenase activity	MF	0.894602	MF 2-methylacyl-CoA dehydrogenase activity
GO:1902189	0.0240716	1	1	1	2-methylbutanoyl-CoA(4-) metabolic process	BP	0.894602	BP 2-methylbutanoyl-CoA(4-) metabolic process
GO:1902190	0.0240716	1	1	1	2-methylbutanoyl-CoA(4-) catabolic process	BP	0.894602	BP 2-methylbutanoyl-CoA(4-) catabolic process
GO:1902192	0.0240716	1	1	1	2-methylbut-2-enoyl-CoA(4-) metabolic process	BP	0.894602	BP 2-methylbut-2-enoyl-CoA(4-) metabolic process
GO:1902195	0.0240716	1	1	1	isovaleryl-CoA(4-) metabolic process	BP	0.894602	BP isovaleryl-CoA(4-) metabolic process
GO:1902196	0.0240716	1	1	1	isovaleryl-CoA(4-) catabolic process	BP	0.894602	BP isovaleryl-CoA(4-) catabolic process
GO:1902198	0.0240716	1	1	1	3-methylbut-2-enoyl-CoA(4-) metabolic process	BP	0.894602	BP 3-methylbut-2-enoyl-CoA(4-) metabolic process
GO:0033609	0.0240716	1	1	1	oxalate metabolic process	BP	0.894602	BP oxalate metabolic process
GO:0033611	0.0240716	1	1	1	oxalate catabolic process	BP	0.894602	BP oxalate catabolic process
GO:0050203	0.0240716	1	1	1	oxalate-CoA ligase activity	MF	0.894602	MF oxalate-CoA ligase activity
GO:0071310	0.0241495	0.983898	43	2011	cellular response to organic substance	BP	0.894918	BP cellular response to organic substance
GO:0015204	0.0242976	0.998284	2	16	urea transmembrane transporter activity	MF	0.896057	MF urea transmembrane transporter activity
GO:0016052	0.024332	0.98674	20	895	carbohydrate catabolic process	BP	0.896057	BP carbohydrate catabolic process
GO:0009065	0.0244166	0.996561	3	38	glutamine family amino acid catabolic process	BP	0.896057	BP glutamine family amino acid catabolic process
GO:0015116	0.0244581	0.996558	3	37	sulfate transmembrane transporter activity	MF	0.896057	MF sulfate transmembrane transporter activity
GO:0004857	0.0246366	0.989981	10	347	enzyme inhibitor activity	MF	0.900038	MF enzyme inhibitor activity
GO:0009808	0.0248308	0.991853	7	205	lignin metabolic process	BP	0.902854	BP lignin metabolic process
GO:0015079	0.0248537	0.991864	7	175	potassium ion transmembrane transporter activity	MF	0.902854	MF potassium ion transmembrane transporter activity
GO:0044724	0.0250804	0.988795	12	471	single-organism carbohydrate catabolic process	BP	0.908531	BP single-organism carbohydrate catabolic process
GO:0047372	0.0251731	0.998231	2	13	acylglycerol lipase activity	MF	0.909334	MF acylglycerol lipase activity
GO:0010262	0.0253925	0.998143	2	18	somatic embryogenesis	BP	0.913844	BP somatic embryogenesis
GO:0030041	0.0254988	0.998152	2	16	actin filament polymerization	BP	0.913844	BP actin filament polymerization
GO:0006537	0.0255105	0.998129	2	18	glutamate biosynthetic process	BP	0.913844	BP glutamate biosynthetic process
GO:0009314	0.0259693	0.983973	30	1322	response to radiation	BP	0.927701	BP response to radiation
GO:0008374	0.0260527	0.990585	8	257	O-acyltransferase activity	MF	0.928111	MF O-acyltransferase activity
GO:0009639	0.0261967	0.989254	10	311	response to red or far red light	BP	0.930669	BP response to red or far red light
GO:0010623	0.0265659	0.998	2	19	developmental programmed cell death	BP	0.941191	BP developmental programmed cell death
GO:0019523	0.0271444	0.999814	1	2	L-idonate metabolic process	BP	0.956433	BP L-idonate metabolic process
GO:0046183	0.0271444	0.999814	1	2	L-idonate catabolic process	BP	0.956433	BP L-idonate catabolic process
GO:0030118	0.0272719	0.995988	3	39	clathrin coat	CC	0.958307	CC clathrin coat
GO:0032446	0.0274942	0.983421	27	1083	protein modification by small protein conjugation	BP	0.961152	BP protein modification by small protein conjugation
GO:0042058	0.0276615	0.997937	2	14	regulation of epidermal growth factor receptor signaling pathway	BP	0.961152	BP regulation of epidermal growth factor receptor signaling pathway
GO:0001505	0.0276753	0.997904	2	16	regulation of neurotransmitter levels	BP	0.961152	BP regulation of neurotransmitter levels
GO:0015200	0.0277255	0.999741	1	3	methylammonium transmembrane transporter activity	MF	0.961152	MF methylammonium transmembrane transporter activity
GO:0072489	0.0277255	0.999741	1	3	methylammonium transmembrane transport	BP	0.961152	BP methylammonium transmembrane transport
GO:0016021	0.0278172	0.977622	163	9565	integral component of membrane	CC	0.961745	CC integral component of membrane
GO:1901184	0.0287838	0.997789	2	15	regulation of ERBB signaling pathway	BP	0.989989	BP regulation of ERBB signaling pathway
GO:0016411	0.0287877	0.99245	5	128	acylglycerol O-acyltransferase activity	MF	0.989989	MF acylglycerol O-acyltransferase activity
GO:0008470	0.028925	0.999788	1	2	isovaleryl-CoA dehydrogenase activity	MF	0.992065	MF isovaleryl-CoA dehydrogenase activity
GO:0003988	0.0292241	0.997638	2	25	acetyl-CoA C-acyltransferase activity	MF	0.999667	MF acetyl-CoA C-acyltransferase activity
GO:0019368	0.0299075	0.999773	1	2	fatty acid elongation, unsaturated fatty acid	BP	1	BP fatty acid elongation, unsaturated fatty acid
GO:0016878	0.0304353	0.995276	3	51	acid-thiol ligase activity	MF	1	MF acid-thiol ligase activity
GO:0004300	0.0304698	0.997488	2	24	enoyl-CoA hydratase activity	MF	1	MF enoyl-CoA hydratase activity
GO:0016634	0.0309497	0.995181	3	47	oxidoreductase activity, acting on the CH-CH group of donors, oxygen as acceptor	MF	1	MF oxidoreductase activity, acting on the CH-CH group of donors, oxygen as acceptor
GO:0003774	0.0310355	0.987618	9	277	motor activity	MF	1	MF motor activity
GO:0031146	0.0310516	0.997483	2	17	SCF-dependent proteasomal ubiquitin-dependent protein catabolic process	BP	1	BP SCF-dependent proteasomal ubiquitin-dependent protein catabolic process
GO:0005618	0.0317586	0.980055	30	1525	cell wall	CC	1	CC cell wall
GO:0030312	0.0317586	0.980055	30	1525	external encapsulating structure	CC	1	CC external encapsulating structure
GO:0005275	0.0321202	0.999608	1	4	amine transmembrane transporter activity	MF	1	MF amine transmembrane transporter activity
GO:0009648	0.0324277	0.989902	6	154	photoperiodism	BP	1	BP photoperiodism
GO:0000325	0.0331119	0.990995	5	126	plant-type vacuole	CC	1	CC plant-type vacuole
GO:0015802	0.033116	0.994673	3	56	basic amino acid transport	BP	1	BP basic amino acid transport
GO:0046906	0.0332204	0.981279	20	1011	tetrapyrrole binding	MF	1	MF tetrapyrrole binding
GO:0042579	0.0336036	0.983792	13	528	microbody	CC	1	CC microbody
GO:0030553	0.0337272	0.994571	3	47	cGMP binding	MF	1	MF cGMP binding
GO:0016491	0.0342024	0.974762	68	4030	oxidoreductase activity	MF	1	MF oxidoreductase activity
GO:2000032	0.0351235	0.999687	1	2	regulation of secondary shoot formation	BP	1	BP regulation of secondary shoot formation
GO:0048645	0.0353756	0.988741	6	170	organ formation	BP	1	BP organ formation
GO:0051213	0.0359268	0.983739	11	409	dioxygenase activity	MF	1	MF dioxygenase activity
GO:1901361	0.0361017	0.97813	25	1056	organic cyclic compound catabolic process	BP	1	BP organic cyclic compound catabolic process
GO:0080154	0.0362767	0.999555	1	3	regulation of fertilization	BP	1	BP regulation of fertilization
GO:0080155	0.0362767	0.999555	1	3	regulation of double fertilization forming a zygote and endosperm	BP	1	BP regulation of double fertilization forming a zygote and endosperm
GO:0016877	0.0365845	0.991616	4	92	ligase activity, forming carbon-sulfur bonds	MF	1	MF ligase activity, forming carbon-sulfur bonds
GO:0010422	0.0369417	0.999538	1	3	regulation of brassinosteroid biosynthetic process	BP	1	BP regulation of brassinosteroid biosynthetic process
GO:0010148	0.0369995	0.996703	2	17	transpiration	BP	1	BP transpiration
GO:0042373	0.037086	0.99965	1	2	vitamin K metabolic process	BP	1	BP vitamin K metabolic process
GO:0047021	0.037086	0.99965	1	2	15-hydroxyprostaglandin dehydrogenase (NADP+) activity	MF	1	MF 15-hydroxyprostaglandin dehydrogenase (NADP+) activity
GO:0050221	0.037086	0.99965	1	2	prostaglandin-E2 9-reductase activity	MF	1	MF prostaglandin-E2 9-reductase activity
GO:0009965	0.0372735	0.988027	6	143	leaf morphogenesis	BP	1	BP leaf morphogenesis
GO:0050660	0.0377979	0.98437	9	304	flavin adenine dinucleotide binding	MF	1	MF flavin adenine dinucleotide binding
GO:0030204	0.0378597	0.996684	2	13	chondroitin sulfate metabolic process	BP	1	BP chondroitin sulfate metabolic process
GO:0030206	0.0378597	0.996684	2	13	chondroitin sulfate biosynthetic process	BP	1	BP chondroitin sulfate biosynthetic process
GO:0046461	0.0382217	0.996459	2	22	neutral lipid catabolic process	BP	1	BP neutral lipid catabolic process
GO:0046464	0.0382217	0.996459	2	22	acylglycerol catabolic process	BP	1	BP acylglycerol catabolic process
GO:1901607	0.038241	0.981207	13	570	alpha-amino acid biosynthetic process	BP	1	BP alpha-amino acid biosynthetic process
GO:0005777	0.0383011	0.981795	12	493	peroxisome	CC	1	CC peroxisome
GO:0015670	0.0383739	0.999501	1	3	carbon dioxide transport	BP	1	BP carbon dioxide transport
GO:0080036	0.0388102	0.996363	2	23	regulation of cytokinin-activated signaling pathway	BP	1	BP regulation of cytokinin-activated signaling pathway
GO:0080043	0.0389791	0.993306	3	60	quercetin 3-O-glucosyltransferase activity	MF	1	MF quercetin 3-O-glucosyltransferase activity
GO:0009887	0.039088	0.985934	7	185	organ morphogenesis	BP	1	BP organ morphogenesis
GO:0005262	0.0392422	0.993262	3	55	calcium channel activity	MF	1	MF calcium channel activity
GO:0030552	0.039325	0.99327	3	49	cAMP binding	MF	1	MF cAMP binding
GO:0009501	0.0398667	0.990654	4	78	amyloplast	CC	1	CC amyloplast
GO:0005868	0.0398844	0.999394	1	4	cytoplasmic dynein complex	CC	1	CC cytoplasmic dynein complex
GO:0003857	0.0400085	0.996151	2	27	3-hydroxyacyl-CoA dehydrogenase activity	MF	1	MF 3-hydroxyacyl-CoA dehydrogenase activity
GO:0000302	0.0407346	0.980469	12	465	response to reactive oxygen species	BP	1	BP response to reactive oxygen species
GO:0044347	0.0409849	0.999572	1	2	cell wall polysaccharide catabolic process	BP	1	BP cell wall polysaccharide catabolic process
GO:0046886	0.0420588	0.9994	1	3	positive regulation of hormone biosynthetic process	BP	1	BP positive regulation of hormone biosynthetic process
GO:0052642	0.0422501	0.999394	1	3	lysophosphatidic acid phosphatase activity	MF	1	MF lysophosphatidic acid phosphatase activity
GO:0050727	0.0427014	0.995735	2	28	regulation of inflammatory response	BP	1	BP regulation of inflammatory response
GO:0010035	0.043222	0.970681	38	1880	response to inorganic substance	BP	1	BP response to inorganic substance
GO:0030551	0.0432467	0.992306	3	51	cyclic nucleotide binding	MF	1	MF cyclic nucleotide binding
GO:0015012	0.0434788	0.995855	2	14	heparan sulfate proteoglycan biosynthetic process	BP	1	BP heparan sulfate proteoglycan biosynthetic process
GO:0030201	0.0434788	0.995855	2	14	heparan sulfate proteoglycan metabolic process	BP	1	BP heparan sulfate proteoglycan metabolic process
GO:0071395	0.0435382	0.987278	5	120	cellular response to jasmonic acid stimulus	BP	1	BP cellular response to jasmonic acid stimulus
GO:0060860	0.0444609	0.999495	1	2	regulation of floral organ abscission	BP	1	BP regulation of floral organ abscission
GO:0060862	0.0444609	0.999495	1	2	negative regulation of floral organ abscission	BP	1	BP negative regulation of floral organ abscission
GO:0042059	0.0449899	0.999483	1	2	negative regulation of epidermal growth factor receptor signaling pathway	BP	1	BP negative regulation of epidermal growth factor receptor signaling pathway
GO:0005267	0.0452552	0.988947	4	81	potassium channel activity	MF	1	MF potassium channel activity
GO:0007015	0.0453495	0.986594	5	124	actin filament organization	BP	1	BP actin filament organization
GO:0009101	0.0458222	0.995438	2	16	glycoprotein biosynthetic process	BP	1	BP glycoprotein biosynthetic process
GO:0030166	0.0458222	0.995438	2	16	proteoglycan biosynthetic process	BP	1	BP proteoglycan biosynthetic process
GO:0009640	0.0458579	0.986395	5	128	photomorphogenesis	BP	1	BP photomorphogenesis
GO:0020037	0.0458965	0.974046	18	910	heme binding	MF	1	MF heme binding
GO:0047274	0.0462267	0.995146	2	32	galactinol-sucrose galactosyltransferase activity	MF	1	MF galactinol-sucrose galactosyltransferase activity
GO:0044706	0.0463597	0.9952	2	24	multi-multicellular organism process	BP	1	BP multi-multicellular organism process
GO:0051315	0.0467625	0.999441	1	2	attachment of mitotic spindle microtubules to kinetochore	BP	1	BP attachment of mitotic spindle microtubules to kinetochore
GO:0006029	0.0470279	0.995222	2	17	proteoglycan metabolic process	BP	1	BP proteoglycan metabolic process
GO:0030600	0.0474965	0.999423	1	2	feruloyl esterase activity	MF	1	MF feruloyl esterase activity
GO:0036155	0.0475646	0.999421	1	2	acylglycerol acyl-chain remodeling	BP	1	BP acylglycerol acyl-chain remodeling
GO:0001556	0.0475646	0.999421	1	2	oocyte maturation	BP	1	BP oocyte maturation
GO:0007097	0.0475646	0.999421	1	2	nuclear migration	BP	1	BP nuclear migration
GO:0040023	0.0475646	0.999421	1	2	establishment of nucleus localization	BP	1	BP establishment of nucleus localization
GO:1900378	0.0475646	0.999421	1	2	positive regulation of secondary metabolite biosynthetic process	BP	1	BP positive regulation of secondary metabolite biosynthetic process
GO:0080162	0.0475646	0.999421	1	2	intracellular auxin transport	BP	1	BP intracellular auxin transport
GO:0019369	0.0480682	0.994899	2	26	arachidonic acid metabolic process	BP	1	BP arachidonic acid metabolic process
GO:0048496	0.0481279	0.995022	2	18	maintenance of organ identity	BP	1	BP maintenance of organ identity
GO:0047389	0.0482084	0.999112	1	4	glycerophosphocholine phosphodiesterase activity	MF	1	MF glycerophosphocholine phosphodiesterase activity
GO:0009313	0.0492796	0.99072	3	60	oligosaccharide catabolic process	BP	1	BP oligosaccharide catabolic process
GO:1901185	0.0498849	0.999153	1	3	negative regulation of ERBB signaling pathway	BP	1	BP negative regulation of ERBB signaling pathway

## Sheet: cluster_5
Gene Ontology (GO) annotations for each cluster of differentially expressed genes
numDEInCat - number of differentially expressed genes in the category
numInCat = number of total genes annotated in this category
Ontologies include: Biological Process (BP), Molecular Function (MF), and Cellular Component (CC)
Cluster 10 includes genes up-regulated in linalool+ plants, including transcripts annotated as putative (R)-(-)-linalool synthase
category	over_represented_pvalue	under_represented_pvalue	numDEInCat	numInCat	term	ontology	over_represented_FDR	go_term
GO:0045836	1.03839e-05	1	3	27	positive regulation of meiotic nuclear division	BP	0.133911	BP positive regulation of meiotic nuclear division
GO:0051785	3.92257e-05	0.999999	3	38	positive regulation of nuclear division	BP	0.252927	BP positive regulation of nuclear division
GO:0040020	0.0001503	0.999997	3	57	regulation of meiotic nuclear division	BP	0.421353	BP regulation of meiotic nuclear division
GO:0051445	0.000219955	0.999994	3	63	regulation of meiotic cell cycle	BP	0.421353	BP regulation of meiotic cell cycle
GO:0004857	0.000220791	0.999982	5	347	enzyme inhibitor activity	MF	0.421353	MF enzyme inhibitor activity
GO:0010638	0.0002666	0.999985	4	159	positive regulation of organelle organization	BP	0.421353	BP positive regulation of organelle organization
GO:0090068	0.000287167	0.999992	3	68	positive regulation of cell cycle process	BP	0.421353	BP positive regulation of cell cycle process
GO:0015840	0.000294059	0.999998	2	14	urea transport	BP	0.421353	BP urea transport
GO:0071918	0.000294059	0.999998	2	14	urea transmembrane transport	BP	0.421353	BP urea transmembrane transport
GO:0015204	0.000345899	0.999997	2	16	urea transmembrane transporter activity	MF	0.446071	MF urea transmembrane transporter activity
GO:0030599	0.000437549	0.999972	4	228	pectinesterase activity	MF	0.512966	MF pectinesterase activity
GO:0019755	0.000890019	0.999988	2	28	one-carbon compound transport	BP	0.956474	BP one-carbon compound transport
GO:0033043	0.00102293	0.999881	5	406	regulation of organelle organization	BP	1	BP regulation of organelle organization
GO:0051783	0.00110575	0.999948	3	109	regulation of nuclear division	BP	1	BP regulation of nuclear division
GO:0051130	0.00125904	0.999892	4	264	positive regulation of cellular component organization	BP	1	BP positive regulation of cellular component organization
GO:0030234	0.00129199	0.9998	6	691	enzyme regulator activity	MF	1	MF enzyme regulator activity
GO:0000322	0.00137169	0.999978	2	26	storage vacuole	CC	1	CC storage vacuole
GO:0048507	0.00140567	0.999928	3	133	meristem development	BP	1	BP meristem development
GO:0042887	0.00165254	0.99997	2	44	amide transmembrane transporter activity	MF	1	MF amide transmembrane transporter activity
GO:0016567	0.00339584	0.999259	7	1040	protein ubiquitination	BP	1	BP protein ubiquitination
GO:0005372	0.0035559	0.999902	2	69	water transmembrane transporter activity	MF	1	MF water transmembrane transporter activity
GO:0015250	0.0035559	0.999902	2	69	water channel activity	MF	1	MF water channel activity
GO:0032446	0.00433902	0.99901	7	1083	protein modification by small protein conjugation	BP	1	BP protein modification by small protein conjugation
GO:0070647	0.00630668	0.998457	7	1163	protein modification by small protein conjugation or removal	BP	1	BP protein modification by small protein conjugation or removal
GO:0010200	0.00702312	0.999365	3	199	response to chitin	BP	1	BP response to chitin
GO:0006817	0.00722039	0.999713	2	90	phosphate ion transport	BP	1	BP phosphate ion transport
GO:0051302	0.00814198	0.999223	3	212	regulation of cell division	BP	1	BP regulation of cell division
GO:0021854	0.0086589	0.999972	1	4	hypothalamus development	BP	1	BP hypothalamus development
GO:0006833	0.00937855	0.999572	2	103	water transport	BP	1	BP water transport
GO:0042044	0.00944706	0.999567	2	104	fluid transport	BP	1	BP fluid transport
GO:0004459	0.0105269	0.999959	1	4	L-lactate dehydrogenase activity	MF	1	MF L-lactate dehydrogenase activity
GO:0060325	0.0108536	0.999956	1	4	face morphogenesis	BP	1	BP face morphogenesis
GO:0010564	0.0109993	0.998827	3	234	regulation of cell cycle process	BP	1	BP regulation of cell cycle process
GO:0005509	0.011308	0.997693	5	806	calcium ion binding	MF	1	MF calcium ion binding
GO:0052689	0.0113531	0.998184	4	530	carboxylic ester hydrolase activity	MF	1	MF carboxylic ester hydrolase activity
GO:0010091	0.0135075	0.999254	2	104	trichome branching	BP	1	BP trichome branching
GO:0043010	0.0136101	0.99992	1	8	camera-type eye development	BP	1	BP camera-type eye development
GO:0017089	0.0137751	0.999922	1	6	glycolipid transporter activity	MF	1	MF glycolipid transporter activity
GO:0046836	0.0137751	0.999922	1	6	glycolipid transport	BP	1	BP glycolipid transport
GO:0051128	0.0142431	0.996923	5	803	regulation of cellular component organization	BP	1	BP regulation of cellular component organization
GO:0019172	0.0142538	0.999909	1	10	glyoxalase III activity	MF	1	MF glyoxalase III activity
GO:0019249	0.0142538	0.999909	1	10	lactate biosynthetic process	BP	1	BP lactate biosynthetic process
GO:0004457	0.0146828	0.999911	1	6	lactate dehydrogenase activity	MF	1	MF lactate dehydrogenase activity
GO:0016874	0.0162134	0.996382	5	879	ligase activity	MF	1	MF ligase activity
GO:0030833	0.0164864	0.998987	2	116	regulation of actin filament polymerization	BP	1	BP regulation of actin filament polymerization
GO:0006089	0.0167615	0.999873	1	11	lactate metabolic process	BP	1	BP lactate metabolic process
GO:0017182	0.0168054	0.999877	1	8	peptidyl-diphthamide metabolic process	BP	1	BP peptidyl-diphthamide metabolic process
GO:0017183	0.0168054	0.999877	1	8	peptidyl-diphthamide biosynthetic process from peptidyl-histidine	BP	1	BP peptidyl-diphthamide biosynthetic process from peptidyl-histidine
GO:0008064	0.0169529	0.998943	2	118	regulation of actin polymerization or depolymerization	BP	1	BP regulation of actin polymerization or depolymerization
GO:0030832	0.0169529	0.998943	2	118	regulation of actin filament length	BP	1	BP regulation of actin filament length
GO:0032271	0.0171899	0.99892	2	119	regulation of protein polymerization	BP	1	BP regulation of protein polymerization
GO:0042807	0.0189608	0.999833	1	15	central vacuole	CC	1	CC central vacuole
GO:0051861	0.0198415	0.999826	1	9	glycolipid binding	MF	1	MF glycolipid binding
GO:0032956	0.0205337	0.998582	2	130	regulation of actin cytoskeleton organization	BP	1	BP regulation of actin cytoskeleton organization
GO:0034389	0.0208712	0.999808	1	9	lipid particle organization	BP	1	BP lipid particle organization
GO:0047501	0.0210434	0.999794	1	16	(+)-neomenthol dehydrogenase activity	MF	1	MF (+)-neomenthol dehydrogenase activity
GO:0001654	0.0213035	0.999792	1	13	eye development	BP	1	BP eye development
GO:0000060	0.0218025	0.99978	1	15	protein import into nucleus, translocation	BP	1	BP protein import into nucleus, translocation
GO:0034314	0.0219761	0.999778	1	13	Arp2/3 complex-mediated actin nucleation	BP	1	BP Arp2/3 complex-mediated actin nucleation
GO:0032970	0.022981	0.998315	2	136	regulation of actin filament-based process	BP	1	BP regulation of actin filament-based process
GO:0043254	0.0236933	0.998233	2	141	regulation of protein complex assembly	BP	1	BP regulation of protein complex assembly
GO:0017137	0.0251303	0.999708	1	14	Rab GTPase binding	MF	1	MF Rab GTPase binding
GO:0042886	0.0254501	0.998027	2	158	amide transport	BP	1	BP amide transport
GO:0032851	0.025509	0.999706	1	11	NA	NA	1	none
GO:0000324	0.0255987	0.999706	1	10	fungal-type vacuole	CC	1	CC fungal-type vacuole
GO:0005302	0.0255987	0.999706	1	10	L-tyrosine transmembrane transporter activity	MF	1	MF L-tyrosine transmembrane transporter activity
GO:0015188	0.0255987	0.999706	1	10	L-isoleucine transmembrane transporter activity	MF	1	MF L-isoleucine transmembrane transporter activity
GO:0015658	0.0255987	0.999706	1	10	branched-chain amino acid transmembrane transporter activity	MF	1	MF branched-chain amino acid transmembrane transporter activity
GO:0015828	0.0255987	0.999706	1	10	tyrosine transport	BP	1	BP tyrosine transport
GO:1902475	0.0255987	0.999706	1	10	L-alpha-amino acid transmembrane transport	BP	1	BP L-alpha-amino acid transmembrane transport
GO:0000326	0.0261617	0.999682	1	15	protein storage vacuole	CC	1	CC protein storage vacuole
GO:0008270	0.0266028	0.98856	12	3855	zinc ion binding	MF	1	MF zinc ion binding
GO:0015803	0.0266541	0.999676	1	12	branched-chain amino acid transport	BP	1	BP branched-chain amino acid transport
GO:0010047	0.0267593	0.999673	1	12	fruit dehiscence	BP	1	BP fruit dehiscence
GO:0006868	0.0280489	0.999638	1	13	glutamine transport	BP	1	BP glutamine transport
GO:0010243	0.0284566	0.995659	3	383	response to organonitrogen compound	BP	1	BP response to organonitrogen compound
GO:0015186	0.0297376	0.999596	1	12	L-glutamine transmembrane transporter activity	MF	1	MF L-glutamine transmembrane transporter activity
GO:0033993	0.0298837	0.991037	6	1351	response to lipid	BP	1	BP response to lipid
GO:0009737	0.0312241	0.991753	5	990	response to abscisic acid	BP	1	BP response to abscisic acid
GO:0015173	0.031287	0.999549	1	13	aromatic amino acid transmembrane transporter activity	MF	1	MF aromatic amino acid transmembrane transporter activity
GO:0009888	0.0317463	0.994948	3	416	tissue development	BP	1	BP tissue development
GO:0045159	0.0318071	0.999529	1	15	myosin II binding	MF	1	MF myosin II binding
GO:0019828	0.0318148	0.999522	1	19	aspartic-type endopeptidase inhibitor activity	MF	1	MF aspartic-type endopeptidase inhibitor activity
GO:0005885	0.0320397	0.999515	1	19	Arp2/3 protein complex	CC	1	CC Arp2/3 protein complex
GO:0080170	0.0327939	0.999483	1	28	hydrogen peroxide transmembrane transport	BP	1	BP hydrogen peroxide transmembrane transport
GO:0015801	0.0354661	0.999401	1	22	aromatic amino acid transport	BP	1	BP aromatic amino acid transport
GO:0048471	0.0355717	0.996698	2	166	perinuclear region of cytoplasm	CC	1	CC perinuclear region of cytoplasm
GO:0007423	0.0357981	0.999392	1	20	sensory organ development	BP	1	BP sensory organ development
GO:0050764	0.0393975	0.999256	1	24	regulation of phagocytosis	BP	1	BP regulation of phagocytosis
GO:0051553	0.0395497	0.999247	1	27	flavone biosynthetic process	BP	1	BP flavone biosynthetic process
GO:0051554	0.0395497	0.999247	1	27	flavonol metabolic process	BP	1	BP flavonol metabolic process
GO:0051555	0.0395497	0.999247	1	27	flavonol biosynthetic process	BP	1	BP flavonol biosynthetic process
GO:0051493	0.0398933	0.996057	2	182	regulation of cytoskeleton organization	BP	1	BP regulation of cytoskeleton organization
GO:0051552	0.0400393	0.999227	1	28	flavone metabolic process	BP	1	BP flavone metabolic process
GO:0047911	0.0403005	0.999214	1	31	galacturan 1,4-alpha-galacturonidase activity	MF	1	MF galacturan 1,4-alpha-galacturonidase activity
GO:0051726	0.0408755	0.992827	3	399	regulation of cell cycle	BP	1	BP regulation of cell cycle
GO:0032922	0.0428564	0.999115	1	27	circadian regulation of gene expression	BP	1	BP circadian regulation of gene expression
GO:0032535	0.0429872	0.995574	2	191	regulation of cellular component size	BP	1	BP regulation of cellular component size
GO:0017022	0.0438608	0.99908	1	22	myosin binding	MF	1	MF myosin binding
GO:0007420	0.0439065	0.999073	1	25	brain development	BP	1	BP brain development
GO:0010031	0.0439848	0.99908	1	20	circumnutation	BP	1	BP circumnutation
GO:0050879	0.0439848	0.99908	1	20	multicellular organismal movement	BP	1	BP multicellular organismal movement
GO:0045165	0.0440682	0.999064	1	27	cell fate commitment	BP	1	BP cell fate commitment
GO:0090066	0.0449524	0.995256	2	197	regulation of anatomical structure size	BP	1	BP regulation of anatomical structure size
GO:0071705	0.0462905	0.988647	4	793	nitrogen compound transport	BP	1	BP nitrogen compound transport
GO:0042995	0.0465966	0.994982	2	220	cell projection	CC	1	CC cell projection
GO:0008022	0.0472526	0.998925	1	25	protein C-terminus binding	MF	1	MF protein C-terminus binding
GO:0044087	0.0483934	0.994681	2	210	regulation of cellular component biogenesis	BP	1	BP regulation of cellular component biogenesis

## Sheet: cluster_6
Gene Ontology (GO) annotations for each cluster of differentially expressed genes
numDEInCat - number of differentially expressed genes in the category
numInCat = number of total genes annotated in this category
Ontologies include: Biological Process (BP), Molecular Function (MF), and Cellular Component (CC)
Cluster 10 includes genes up-regulated in linalool+ plants, including transcripts annotated as putative (R)-(-)-linalool synthase
category	over_represented_pvalue	under_represented_pvalue	numDEInCat	numInCat	term	ontology	over_represented_FDR	go_term
GO:0010333	3.12812e-14	1	12	81	terpene synthase activity	MF	4.03403e-10	MF terpene synthase activity
GO:0016838	1.55292e-13	1	12	87	carbon-oxygen lyase activity, acting on phosphates	MF	1.00133e-09	MF carbon-oxygen lyase activity, acting on phosphates
GO:0010279	1.37836e-11	1	6	8	indole-3-acetic acid amido synthetase activity	MF	5.9251e-08	MF indole-3-acetic acid amido synthetase activity
GO:0010334	7.9592e-10	1	6	15	sesquiterpene synthase activity	MF	2.56605e-06	MF sesquiterpene synthase activity
GO:0008152	5.06933e-09	1	217	24344	metabolic process	BP	1.17303e-05	BP metabolic process
GO:0015293	5.45764e-09	1	16	376	symporter activity	MF	1.17303e-05	MF symporter activity
GO:0034004	7.29373e-09	1	5	10	germacradienol synthase activity	MF	1.17575e-05	MF germacradienol synthase activity
GO:0052577	7.29373e-09	1	5	10	germacrene-D synthase activity	MF	1.17575e-05	MF germacrene-D synthase activity
GO:0016491	1.93521e-08	1	55	4030	oxidoreductase activity	MF	2.77294e-05	MF oxidoreductase activity
GO:0048046	2.35597e-08	1	24	986	apoplast	CC	3.03826e-05	CC apoplast
GO:0015706	5.5317e-08	1	8	89	nitrate transport	BP	6.17356e-05	BP nitrate transport
GO:0015112	5.74462e-08	1	8	90	nitrate transmembrane transporter activity	MF	6.17356e-05	MF nitrate transmembrane transporter activity
GO:0009812	6.76758e-08	1	14	324	flavonoid metabolic process	BP	6.71344e-05	BP flavonoid metabolic process
GO:0005576	9.7407e-08	1	42	2653	extracellular region	CC	8.97258e-05	CC extracellular region
GO:0009813	1.29518e-07	1	13	285	flavonoid biosynthetic process	BP	0.000111122	BP flavonoid biosynthetic process
GO:0004753	1.55102e-07	1	4	10	saccharopine dehydrogenase activity	MF	0.000111122	MF saccharopine dehydrogenase activity
GO:0047130	1.55102e-07	1	4	10	saccharopine dehydrogenase (NADP+, L-lysine-forming) activity	MF	0.000111122	MF saccharopine dehydrogenase (NADP+, L-lysine-forming) activity
GO:0047131	1.55102e-07	1	4	10	saccharopine dehydrogenase (NAD+, L-glutamate-forming) activity	MF	0.000111122	MF saccharopine dehydrogenase (NAD+, L-glutamate-forming) activity
GO:0010252	1.74908e-07	1	6	27	auxin homeostasis	BP	0.000118717	BP auxin homeostasis
GO:0016758	1.88136e-07	1	25	1225	transferase activity, transferring hexosyl groups	MF	0.00012131	MF transferase activity, transferring hexosyl groups
GO:0008299	2.82051e-07	1	15	423	isoprenoid biosynthetic process	BP	0.000173206	BP isoprenoid biosynthetic process
GO:0050468	3.24753e-07	1	3	3	reticuline oxidase activity	MF	0.000190364	MF reticuline oxidase activity
GO:0044710	3.45459e-07	1	109	10476	single-organism metabolic process	BP	0.000193697	BP single-organism metabolic process
GO:0055114	5.14123e-07	1	40	2231	oxidation-reduction process	BP	0.000273696	BP oxidation-reduction process
GO:0047274	5.30584e-07	1	5	32	galactinol-sucrose galactosyltransferase activity	MF	0.000273696	MF galactinol-sucrose galactosyltransferase activity
GO:0080165	6.81e-07	1	4	15	callose deposition in phloem sieve plate	BP	0.000337776	BP callose deposition in phloem sieve plate
GO:0071704	1.12335e-06	1	193	22013	organic substance metabolic process	BP	0.000536547	BP organic substance metabolic process
GO:0006554	1.48057e-06	1	4	16	lysine catabolic process	BP	0.000596671	BP lysine catabolic process
GO:0019474	1.48057e-06	1	4	16	L-lysine catabolic process to acetyl-CoA	BP	0.000596671	BP L-lysine catabolic process to acetyl-CoA
GO:0019477	1.48057e-06	1	4	16	L-lysine catabolic process	BP	0.000596671	BP L-lysine catabolic process
GO:0033512	1.48057e-06	1	4	16	L-lysine catabolic process to acetyl-CoA via saccharopine	BP	0.000596671	BP L-lysine catabolic process to acetyl-CoA via saccharopine
GO:0046440	1.48057e-06	1	4	16	L-lysine metabolic process	BP	0.000596671	BP L-lysine metabolic process
GO:0016757	1.71572e-06	0.999999	27	1514	transferase activity, transferring glycosyl groups	MF	0.000670481	MF transferase activity, transferring glycosyl groups
GO:0006720	2.00566e-06	1	15	494	isoprenoid metabolic process	BP	0.000760734	BP isoprenoid metabolic process
GO:0046992	2.13615e-06	1	3	5	oxidoreductase activity, acting on X-H and Y-H to form an X-Y bond	MF	0.000765217	MF oxidoreductase activity, acting on X-H and Y-H to form an X-Y bond
GO:0046993	2.13615e-06	1	3	5	oxidoreductase activity, acting on X-H and Y-H to form an X-Y bond, with oxygen as acceptor	MF	0.000765217	MF oxidoreductase activity, acting on X-H and Y-H to form an X-Y bond, with oxygen as acceptor
GO:0016645	2.94264e-06	1	7	106	oxidoreductase activity, acting on the CH-NH group of donors	MF	0.0010225	MF oxidoreductase activity, acting on the CH-NH group of donors
GO:0016762	3.01295e-06	1	7	134	xyloglucan:xyloglucosyl transferase activity	MF	0.0010225	MF xyloglucan:xyloglucosyl transferase activity
GO:0016157	3.37949e-06	1	4	19	sucrose synthase activity	MF	0.00111748	MF sucrose synthase activity
GO:0009068	3.74693e-06	1	5	36	aspartate family amino acid catabolic process	BP	0.00120801	BP aspartate family amino acid catabolic process
GO:0019748	4.03646e-06	0.999999	16	634	secondary metabolic process	BP	0.00126589	BP secondary metabolic process
GO:0008762	4.12277e-06	1	6	61	UDP-N-acetylmuramate dehydrogenase activity	MF	0.00126589	MF UDP-N-acetylmuramate dehydrogenase activity
GO:0016705	6.59316e-06	0.999998	21	1105	oxidoreductase activity, acting on paired donors, with incorporation or reduction of molecular oxygen	MF	0.00197733	MF oxidoreductase activity, acting on paired donors, with incorporation or reduction of molecular oxygen
GO:0016114	7.04464e-06	0.999999	12	359	terpenoid biosynthetic process	BP	0.00206472	BP terpenoid biosynthetic process
GO:0006721	8.97898e-06	0.999998	13	428	terpenoid metabolic process	BP	0.00257318	BP terpenoid metabolic process
GO:0050660	9.23593e-06	0.999999	11	304	flavin adenine dinucleotide binding	MF	0.00258927	MF flavin adenine dinucleotide binding
GO:0008509	1.09196e-05	0.999997	16	641	anion transmembrane transporter activity	MF	0.00299615	MF anion transmembrane transporter activity
GO:0016835	1.24265e-05	0.999998	13	484	carbon-oxygen lyase activity	MF	0.00333859	MF carbon-oxygen lyase activity
GO:0071705	1.47729e-05	0.999996	18	793	nitrogen compound transport	BP	0.00388798	BP nitrogen compound transport
GO:0051213	2.27336e-05	0.999996	12	409	dioxygenase activity	MF	0.00586345	MF dioxygenase activity
GO:0010167	2.83959e-05	0.999999	5	55	response to nitrate	BP	0.00718026	BP response to nitrate
GO:0046577	3.06882e-05	1	3	10	long-chain-alcohol oxidase activity	MF	0.00761068	MF long-chain-alcohol oxidase activity
GO:0044282	3.43265e-05	0.999992	13	544	small molecule catabolic process	BP	0.00828387	BP small molecule catabolic process
GO:0015291	3.46874e-05	0.99999	17	775	secondary active transmembrane transporter activity	MF	0.00828387	MF secondary active transmembrane transporter activity
GO:0006820	3.76721e-05	0.99999	17	782	anion transport	BP	0.00883308	BP anion transport
GO:0000287	4.4929e-05	0.99999	13	519	magnesium ion binding	MF	0.0103465	MF magnesium ion binding
GO:0015171	5.0227e-05	0.999993	8	188	amino acid transmembrane transporter activity	MF	0.0113636	MF amino acid transmembrane transporter activity
GO:0043436	5.97403e-05	0.999973	39	3154	oxoacid metabolic process	BP	0.0132829	BP oxoacid metabolic process
GO:0005985	6.11893e-05	0.999995	6	94	sucrose metabolic process	BP	0.0133556	BP sucrose metabolic process
GO:1901804	6.31738e-05	0.999998	4	35	beta-glucoside metabolic process	BP	0.0133556	BP beta-glucoside metabolic process
GO:1901806	6.31738e-05	0.999998	4	35	beta-glucoside biosynthetic process	BP	0.0133556	BP beta-glucoside biosynthetic process
GO:0006082	6.63234e-05	0.99997	39	3166	organic acid metabolic process	BP	0.0137953	BP organic acid metabolic process
GO:0010117	6.86353e-05	0.999999	3	12	photoprotection	BP	0.0140495	BP photoprotection
GO:0047085	7.7584e-05	0.999999	3	18	hydroxyphenylacetonitrile 2-monooxygenase activity	MF	0.0153927	MF hydroxyphenylacetonitrile 2-monooxygenase activity
GO:0050592	7.7584e-05	0.999999	3	18	4-hydroxyphenylacetaldehyde oxime monooxygenase activity	MF	0.0153927	MF 4-hydroxyphenylacetaldehyde oxime monooxygenase activity
GO:0044712	8.54217e-05	0.999964	31	2234	single-organism catabolic process	BP	0.0164863	BP single-organism catabolic process
GO:0016138	8.56531e-05	0.999996	4	42	glycoside biosynthetic process	BP	0.0164863	BP glycoside biosynthetic process
GO:0042440	9.04617e-05	0.999981	11	401	pigment metabolic process	BP	0.0171558	BP pigment metabolic process
GO:0009063	0.000101448	0.999985	8	220	cellular amino acid catabolic process	BP	0.0189605	BP cellular amino acid catabolic process
GO:0009733	0.000106591	0.999968	17	855	response to auxin	BP	0.0196372	BP response to auxin
GO:0006629	0.000114697	0.999948	36	2747	lipid metabolic process	BP	0.0208328	BP lipid metabolic process
GO:0004565	0.000116971	0.999988	6	116	beta-galactosidase activity	MF	0.0209508	MF beta-galactosidase activity
GO:0016706	0.000119131	0.999979	9	278	oxidoreductase activity, acting on paired donors, with incorporation or reduction of molecular oxygen, 2-oxoglutarate as one donor, and incorporation of one atom each of oxygen into both donors	MF	0.0210454	MF oxidoreductase activity, acting on paired donors, with incorporation or reduction of molecular oxygen, 2-oxoglutarate as one donor, and incorporation of one atom each of oxygen into both donors
GO:0016881	0.000127257	0.999984	7	144	acid-amino acid ligase activity	MF	0.021922	MF acid-amino acid ligase activity
GO:0005618	0.000129596	0.999952	23	1525	cell wall	CC	0.021922	CC cell wall
GO:0030312	0.000129596	0.999952	23	1525	external encapsulating structure	CC	0.021922	CC external encapsulating structure
GO:0009823	0.000130893	0.999997	3	17	cytokinin catabolic process	BP	0.021922	BP cytokinin catabolic process
GO:0009066	0.000144081	0.999978	8	236	aspartate family amino acid metabolic process	BP	0.0238214	BP aspartate family amino acid metabolic process
GO:0019139	0.000159916	0.999996	3	20	cytokinin dehydrogenase activity	MF	0.0257501	MF cytokinin dehydrogenase activity
GO:0016054	0.000161737	0.999967	10	393	organic acid catabolic process	BP	0.0257501	BP organic acid catabolic process
GO:0046395	0.000161737	0.999967	10	393	carboxylic acid catabolic process	BP	0.0257501	BP carboxylic acid catabolic process
GO:0009725	0.000167777	0.999922	36	2668	response to hormone	BP	0.0261504	BP response to hormone
GO:0016829	0.000172308	0.999943	18	1065	lyase activity	MF	0.0261504	MF lyase activity
GO:0010436	0.000172362	0.999996	3	14	carotenoid dioxygenase activity	MF	0.0261504	MF carotenoid dioxygenase activity
GO:0045549	0.000172362	0.999996	3	14	9-cis-epoxycarotenoid dioxygenase activity	MF	0.0261504	MF 9-cis-epoxycarotenoid dioxygenase activity
GO:0008970	0.000185664	0.999991	4	49	phosphatidylcholine 1-acylhydrolase activity	MF	0.027841	MF phosphatidylcholine 1-acylhydrolase activity
GO:0046283	0.00019631	0.999978	6	120	anthocyanin-containing compound metabolic process	BP	0.029099	BP anthocyanin-containing compound metabolic process
GO:0045552	0.000220943	0.999995	3	17	dihydrokaempferol 4-reductase activity	MF	0.0323782	MF dihydrokaempferol 4-reductase activity
GO:0009719	0.000226729	0.999891	38	2917	response to endogenous stimulus	BP	0.0328528	BP response to endogenous stimulus
GO:0035251	0.000238285	0.999949	10	402	UDP-glucosyltransferase activity	MF	0.0338202	MF UDP-glucosyltransferase activity
GO:0016798	0.000238651	0.999917	19	1218	hydrolase activity, acting on glycosyl bonds	MF	0.0338202	MF hydrolase activity, acting on glycosyl bonds
GO:0019752	0.000246304	0.999883	36	3042	carboxylic acid metabolic process	BP	0.0345253	BP carboxylic acid metabolic process
GO:0015103	0.000257627	0.999956	8	243	inorganic anion transmembrane transporter activity	MF	0.0351447	MF inorganic anion transmembrane transporter activity
GO:0016646	0.000261072	0.999985	4	56	oxidoreductase activity, acting on the CH-NH group of donors, NAD or NADP as acceptor	MF	0.0351447	MF oxidoreductase activity, acting on the CH-NH group of donors, NAD or NADP as acceptor
GO:0015203	0.000264348	0.999993	3	14	polyamine transmembrane transporter activity	MF	0.0351447	MF polyamine transmembrane transporter activity
GO:0015846	0.000264348	0.999993	3	14	polyamine transport	BP	0.0351447	BP polyamine transport
GO:1902047	0.000264348	0.999993	3	14	polyamine transmembrane transport	BP	0.0351447	BP polyamine transmembrane transport
GO:0009698	0.000281937	0.999933	11	456	phenylpropanoid metabolic process	BP	0.0371006	BP phenylpropanoid metabolic process
GO:1901606	0.000303693	0.999955	7	188	alpha-amino acid catabolic process	BP	0.0395599	BP alpha-amino acid catabolic process
GO:0046538	0.000316176	0.999998	2	5	2,3-bisphosphoglycerate-dependent phosphoglycerate mutase activity	MF	0.0407741	MF 2,3-bisphosphoglycerate-dependent phosphoglycerate mutase activity
GO:0015802	0.000319944	0.999981	4	56	basic amino acid transport	BP	0.0407793	BP basic amino acid transport
GO:0006865	0.000322541	0.999944	8	255	amino acid transport	BP	0.0407793	BP amino acid transport
GO:0047714	0.000341407	0.99999	3	31	galactolipase activity	MF	0.0424019	MF galactolipase activity
GO:0080054	0.000346801	0.99999	3	26	low-affinity nitrate transmembrane transporter activity	MF	0.0424019	MF low-affinity nitrate transmembrane transporter activity
GO:0080055	0.000346801	0.99999	3	26	low-affinity nitrate transport	BP	0.0424019	BP low-affinity nitrate transport
GO:0016137	0.000348527	0.999979	4	56	glycoside metabolic process	BP	0.0424019	BP glycoside metabolic process
GO:0006084	0.000366503	0.999978	4	55	acetyl-CoA metabolic process	BP	0.0441722	BP acetyl-CoA metabolic process
GO:0008150	0.000371902	0.999804	255	33631	biological_process	BP	0.0444079	BP biological_process
GO:0016879	0.00039755	0.999919	9	330	ligase activity, forming carbon-nitrogen bonds	MF	0.047035	MF ligase activity, forming carbon-nitrogen bonds
GO:0010345	0.000401229	0.999975	4	42	suberin biosynthetic process	BP	0.0470386	BP suberin biosynthetic process
GO:0010033	0.000433719	0.999776	42	3473	response to organic substance	BP	0.0503896	BP response to organic substance
GO:0001101	0.000445739	0.999796	30	2214	response to acid chemical	BP	0.0513237	BP response to acid chemical
GO:0010214	0.000477258	0.999953	5	87	seed coat development	BP	0.0544665	BP seed coat development
GO:0003824	0.000506318	0.999673	189	24205	catalytic activity	MF	0.0570825	MF catalytic activity
GO:0015925	0.000509032	0.999933	6	153	galactosidase activity	MF	0.0570825	MF galactosidase activity
GO:0010132	0.000524266	0.999982	3	28	dhurrin biosynthetic process	BP	0.0582839	BP dhurrin biosynthetic process
GO:0005506	0.000540388	0.999818	16	1053	iron ion binding	MF	0.0591484	MF iron ion binding
GO:0047405	0.000541215	0.999997	2	4	pyrimidine-5'-nucleotide nucleosidase activity	MF	0.0591484	MF pyrimidine-5'-nucleotide nucleosidase activity
GO:0046527	0.000545946	0.999871	10	443	glucosyltransferase activity	MF	0.0591641	MF glucosyltransferase activity
GO:0003333	0.000585679	0.999921	6	126	amino acid transmembrane transport	BP	0.062941	BP amino acid transmembrane transport
GO:0009505	0.000598455	0.999857	10	415	plant-type cell wall	CC	0.0637824	CC plant-type cell wall
GO:0009058	0.000614269	0.999612	95	10218	biosynthetic process	BP	0.0649313	BP biosynthetic process
GO:0080001	0.000658235	0.999953	4	53	mucilage extrusion from seed coat	BP	0.069013	BP mucilage extrusion from seed coat
GO:0004553	0.000665174	0.999763	17	1123	hydrolase activity, hydrolyzing O-glycosyl compounds	MF	0.0690466	MF hydrolase activity, hydrolyzing O-glycosyl compounds
GO:0005342	0.000674618	0.999868	8	271	organic acid transmembrane transporter activity	MF	0.0690466	MF organic acid transmembrane transporter activity
GO:0046943	0.000674618	0.999868	8	271	carboxylic acid transmembrane transporter activity	MF	0.0690466	MF carboxylic acid transmembrane transporter activity
GO:0042761	0.00069272	0.99995	4	56	very long-chain fatty acid biosynthetic process	BP	0.0703411	BP very long-chain fatty acid biosynthetic process
GO:0019756	0.000707991	0.999972	3	35	cyanogenic glycoside biosynthetic process	BP	0.07035	BP cyanogenic glycoside biosynthetic process
GO:0042341	0.000707991	0.999972	3	35	cyanogenic glycoside metabolic process	BP	0.07035	BP cyanogenic glycoside metabolic process
GO:0016710	0.000709174	0.999993	2	6	trans-cinnamate 4-monooxygenase activity	MF	0.07035	MF trans-cinnamate 4-monooxygenase activity
GO:0050898	0.000734838	0.999971	3	33	nitrile metabolic process	BP	0.0717914	BP nitrile metabolic process
GO:0080028	0.000734838	0.999971	3	33	nitrile biosynthetic process	BP	0.0717914	BP nitrile biosynthetic process
GO:0008236	0.000746643	0.999817	10	409	serine-type peptidase activity	MF	0.0718174	MF serine-type peptidase activity
GO:0017171	0.000746643	0.999817	10	409	serine hydrolase activity	MF	0.0718174	MF serine hydrolase activity
GO:0016614	0.000751811	0.999773	13	700	oxidoreductase activity, acting on CH-OH group of donors	MF	0.0718174	MF oxidoreductase activity, acting on CH-OH group of donors
GO:0044550	0.000837354	0.999791	10	438	secondary metabolite biosynthetic process	BP	0.0794009	BP secondary metabolite biosynthetic process
GO:0008610	0.000865057	0.999631	23	1634	lipid biosynthetic process	BP	0.081429	BP lipid biosynthetic process
GO:0015698	0.00089114	0.999818	8	300	inorganic anion transport	BP	0.0828911	BP inorganic anion transport
GO:0009718	0.000898591	0.999898	5	105	anthocyanin-containing compound biosynthetic process	BP	0.0828911	BP anthocyanin-containing compound biosynthetic process
GO:0000038	0.000903447	0.999929	4	61	very long-chain fatty acid metabolic process	BP	0.0828911	BP very long-chain fatty acid metabolic process
GO:0016682	0.0009063	0.999896	5	126	oxidoreductase activity, acting on diphenols and related substances as donors, oxygen as acceptor	MF	0.0828911	MF oxidoreductase activity, acting on diphenols and related substances as donors, oxygen as acceptor
GO:1901700	0.000987195	0.999493	36	2969	response to oxygen-containing compound	BP	0.089654	BP response to oxygen-containing compound
GO:0044255	0.000994516	0.999541	27	2096	cellular lipid metabolic process	BP	0.0896872	BP cellular lipid metabolic process
GO:0042447	0.00105016	0.999953	3	35	hormone catabolic process	BP	0.0940474	BP hormone catabolic process
GO:0052689	0.0010583	0.999706	11	530	carboxylic ester hydrolase activity	MF	0.0941227	MF carboxylic ester hydrolase activity
GO:0006553	0.0010924	0.999909	4	72	lysine metabolic process	BP	0.0964566	BP lysine metabolic process
GO:0052716	0.0010995	0.999908	4	84	hydroquinone:oxygen oxidoreductase activity	MF	0.0964566	MF hydroquinone:oxygen oxidoreductase activity
GO:0046274	0.00120423	0.999897	4	85	lignin catabolic process	BP	0.104931	BP lignin catabolic process
GO:0004838	0.00149546	0.999979	2	7	L-tyrosine:2-oxoglutarate aminotransferase activity	MF	0.12857	MF L-tyrosine:2-oxoglutarate aminotransferase activity
GO:0070547	0.00149546	0.999979	2	7	L-tyrosine aminotransferase activity	MF	0.12857	MF L-tyrosine aminotransferase activity
GO:0005984	0.00151051	0.999754	6	185	disaccharide metabolic process	BP	0.129004	BP disaccharide metabolic process
GO:0048359	0.00155076	0.999859	4	68	mucilage metabolic process involved in seed coat development	BP	0.130874	BP mucilage metabolic process involved in seed coat development
GO:0048037	0.00155271	0.999351	20	1521	cofactor binding	MF	0.130874	MF cofactor binding
GO:0034009	0.00159663	0.999974	2	12	isoprene synthase activity	MF	0.132905	MF isoprene synthase activity
GO:0045430	0.00159742	0.999976	2	7	chalcone isomerase activity	MF	0.132905	MF chalcone isomerase activity
GO:0048029	0.00161768	0.999788	5	138	monosaccharide binding	MF	0.133728	MF monosaccharide binding
GO:0044711	0.00170827	0.999022	47	4616	single-organism biosynthetic process	BP	0.140317	BP single-organism biosynthetic process
GO:0045486	0.00179209	0.999902	3	38	naringenin 3-dioxygenase activity	MF	0.146271	MF naringenin 3-dioxygenase activity
GO:0006508	0.0018937	0.999258	17	951	proteolysis	BP	0.153592	BP proteolysis
GO:0015849	0.00193903	0.999502	9	408	organic acid transport	BP	0.155315	BP organic acid transport
GO:0046942	0.00193903	0.999502	9	408	carboxylic acid transport	BP	0.155315	BP carboxylic acid transport
GO:0009416	0.00199334	0.999169	19	1258	response to light stimulus	BP	0.157834	BP response to light stimulus
GO:0044699	0.00200512	0.998628	158	19190	single-organism process	BP	0.157834	BP single-organism process
GO:0016899	0.00204506	0.999884	3	33	oxidoreductase activity, acting on the CH-OH group of donors, oxygen as acceptor	MF	0.157834	MF oxidoreductase activity, acting on the CH-OH group of donors, oxygen as acceptor
GO:0016679	0.00206859	0.999713	5	149	oxidoreductase activity, acting on diphenols and related substances as donors	MF	0.157834	MF oxidoreductase activity, acting on diphenols and related substances as donors
GO:0006787	0.00207268	0.999883	3	31	porphyrin-containing compound catabolic process	BP	0.157834	BP porphyrin-containing compound catabolic process
GO:0015996	0.00207268	0.999883	3	31	chlorophyll catabolic process	BP	0.157834	BP chlorophyll catabolic process
GO:0033015	0.00207268	0.999883	3	31	tetrapyrrole catabolic process	BP	0.157834	BP tetrapyrrole catabolic process
GO:0046149	0.00207268	0.999883	3	31	pigment catabolic process	BP	0.157834	BP pigment catabolic process
GO:1901576	0.00208063	0.998636	89	9782	organic substance biosynthetic process	BP	0.157834	BP organic substance biosynthetic process
GO:0010191	0.00211533	0.99979	4	75	mucilage metabolic process	BP	0.159528	BP mucilage metabolic process
GO:0019310	0.00232938	0.999952	2	15	inositol catabolic process	BP	0.173519	BP inositol catabolic process
GO:0050113	0.00232938	0.999952	2	15	inositol oxygenase activity	MF	0.173519	MF inositol oxygenase activity
GO:0016701	0.00234121	0.999665	5	169	oxidoreductase activity, acting on single donors with incorporation of molecular oxygen	MF	0.173519	MF oxidoreductase activity, acting on single donors with incorporation of molecular oxygen
GO:0046271	0.00239001	0.999752	4	105	phenylpropanoid catabolic process	BP	0.176124	BP phenylpropanoid catabolic process
GO:0008378	0.00268025	0.999605	5	160	galactosyltransferase activity	MF	0.196389	MF galactosyltransferase activity
GO:0046906	0.00270503	0.999011	14	1011	tetrapyrrole binding	MF	0.197085	MF tetrapyrrole binding
GO:0008514	0.002854	0.999298	8	328	organic anion transmembrane transporter activity	MF	0.20583	MF organic anion transmembrane transporter activity
GO:0050552	0.00285698	1	1	1	(4S)-limonene synthase activity	MF	0.20583	MF (4S)-limonene synthase activity
GO:0035264	0.00304943	0.999932	2	10	multicellular organism growth	BP	0.218475	BP multicellular organism growth
GO:0018293	0.00312089	1	1	1	protein-FAD linkage	BP	0.222359	BP protein-FAD linkage
GO:0020037	0.00322611	0.998848	13	910	heme binding	MF	0.228593	MF heme binding
GO:0009642	0.0032688	0.999378	6	200	response to light intensity	BP	0.229755	BP response to light intensity
GO:0051187	0.00327815	0.999779	3	37	cofactor catabolic process	BP	0.229755	BP cofactor catabolic process
GO:0033037	0.00347225	0.999601	4	101	polysaccharide localization	BP	0.240743	BP polysaccharide localization
GO:0052545	0.00347225	0.999601	4	101	callose localization	BP	0.240743	BP callose localization
GO:0009314	0.00359026	0.998422	19	1322	response to radiation	BP	0.247542	BP response to radiation
GO:0043617	0.00360871	0.999905	2	18	cellular response to sucrose starvation	BP	0.247542	BP cellular response to sucrose starvation
GO:0004806	0.00371431	0.999567	4	86	triglyceride lipase activity	MF	0.252047	MF triglyceride lipase activity
GO:0009688	0.00375762	0.99973	3	52	abscisic acid biosynthetic process	BP	0.252047	BP abscisic acid biosynthetic process
GO:0043289	0.00375762	0.99973	3	52	apocarotenoid biosynthetic process	BP	0.252047	BP apocarotenoid biosynthetic process
GO:1902645	0.00375762	0.99973	3	52	tertiary alcohol biosynthetic process	BP	0.252047	BP tertiary alcohol biosynthetic process
GO:0042221	0.00377211	0.997694	52	5122	response to chemical	BP	0.252047	BP response to chemical
GO:0009311	0.00382472	0.999122	7	288	oligosaccharide metabolic process	BP	0.253882	BP oligosaccharide metabolic process
GO:0071484	0.00383895	0.999898	2	14	cellular response to light intensity	BP	0.253882	BP cellular response to light intensity
GO:0050403	0.00394243	0.99989	2	20	trans-zeatin O-beta-D-glucosyltransferase activity	MF	0.259396	MF trans-zeatin O-beta-D-glucosyltransferase activity
GO:0050662	0.00408208	0.998379	15	1083	coenzyme binding	MF	0.266369	MF coenzyme binding
GO:0031965	0.00408972	0.999339	5	126	nuclear membrane	CC	0.266369	CC nuclear membrane
GO:0003849	0.00411645	0.999886	2	15	3-deoxy-7-phosphoheptulonate synthase activity	MF	0.266762	MF 3-deoxy-7-phosphoheptulonate synthase activity
GO:0070981	0.0042037	0.99988	2	18	L-asparagine biosynthetic process	BP	0.269706	BP L-asparagine biosynthetic process
GO:0070982	0.0042037	0.99988	2	18	L-asparagine metabolic process	BP	0.269706	BP L-asparagine metabolic process
GO:0033383	0.00424167	0.999883	2	13	geranyl diphosphate metabolic process	BP	0.270795	BP geranyl diphosphate metabolic process
GO:1901564	0.00451367	0.997456	36	3439	organonitrogen compound metabolic process	BP	0.28674	BP organonitrogen compound metabolic process
GO:0009646	0.00473876	0.999629	3	58	response to absence of light	BP	0.299564	BP response to absence of light
GO:1901615	0.0047875	0.99821	13	847	organic hydroxy compound metabolic process	BP	0.301169	BP organic hydroxy compound metabolic process
GO:0022804	0.00483572	0.997865	18	1338	active transmembrane transporter activity	MF	0.302725	MF active transmembrane transporter activity
GO:0009081	0.00488715	0.99938	4	118	branched-chain amino acid metabolic process	BP	0.304467	BP branched-chain amino acid metabolic process
GO:0003997	0.00508186	0.999839	2	19	acyl-CoA oxidase activity	MF	0.31457	MF acyl-CoA oxidase activity
GO:0080043	0.0050981	0.99959	3	60	quercetin 3-O-glucosyltransferase activity	MF	0.31457	MF quercetin 3-O-glucosyltransferase activity
GO:0031418	0.00514677	0.999338	4	114	L-ascorbic acid binding	MF	0.316061	MF L-ascorbic acid binding
GO:0006637	0.00521795	0.999325	4	117	acyl-CoA metabolic process	BP	0.317409	BP acyl-CoA metabolic process
GO:0035383	0.00521795	0.999325	4	117	thioester metabolic process	BP	0.317409	BP thioester metabolic process
GO:0004619	0.00528088	0.99983	2	19	phosphoglycerate mutase activity	MF	0.319728	MF phosphoglycerate mutase activity
GO:0006551	0.00547462	0.999548	3	62	leucine metabolic process	BP	0.32991	BP leucine metabolic process
GO:0010225	0.00582209	0.999813	2	12	response to UV-C	BP	0.349217	BP response to UV-C
GO:0016832	0.00592703	0.999497	3	59	aldehyde-lyase activity	MF	0.353866	MF aldehyde-lyase activity
GO:0006552	0.00601603	0.999795	2	17	leucine catabolic process	BP	0.357524	BP leucine catabolic process
GO:0071214	0.00624694	0.998431	7	301	cellular response to abiotic stimulus	BP	0.369543	BP cellular response to abiotic stimulus
GO:0071491	0.00648994	0.999768	2	18	cellular response to red light	BP	0.382165	BP cellular response to red light
GO:0044281	0.00652882	0.995956	48	5096	small molecule metabolic process	BP	0.382707	BP small molecule metabolic process
GO:0015711	0.00682657	0.99788	9	476	organic anion transport	BP	0.398351	BP organic anion transport
GO:0004497	0.00704164	0.997491	11	782	monooxygenase activity	MF	0.409049	MF monooxygenase activity
GO:0010199	0.00718442	0.999737	2	14	organ boundary specification between lateral organs and the meristem	BP	0.415472	BP organ boundary specification between lateral organs and the meristem
GO:0046246	0.00747762	0.999716	2	16	terpene biosynthetic process	BP	0.430497	BP terpene biosynthetic process
GO:1901698	0.00758386	0.99743	10	564	response to nitrogen compound	BP	0.434673	BP response to nitrogen compound
GO:0003995	0.00840188	0.999649	2	24	acyl-CoA dehydrogenase activity	MF	0.479427	MF acyl-CoA dehydrogenase activity
GO:0047213	0.00890859	0.999616	2	25	anthocyanidin 3-O-glucosyltransferase activity	MF	0.506102	MF anthocyanidin 3-O-glucosyltransferase activity
GO:0046148	0.00903232	0.997566	7	353	pigment biosynthetic process	BP	0.510881	BP pigment biosynthetic process
GO:0016616	0.00928782	0.996755	10	640	oxidoreductase activity, acting on the CH-OH group of donors, NAD or NADP as acceptor	MF	0.523038	MF oxidoreductase activity, acting on the CH-OH group of donors, NAD or NADP as acceptor
GO:0050551	0.00951096	0.99997	1	3	myrcene synthase activity	MF	0.533275	MF myrcene synthase activity
GO:0016106	0.00964859	0.999017	3	74	sesquiterpenoid biosynthetic process	BP	0.53865	BP sesquiterpenoid biosynthetic process
GO:0071482	0.00972165	0.998055	5	185	cellular response to light stimulus	BP	0.540389	BP cellular response to light stimulus
GO:0010260	0.00977449	0.997661	6	236	organ senescence	BP	0.540995	BP organ senescence
GO:1900384	0.0103578	1	1	1	regulation of flavonol biosynthetic process	BP	0.570827	BP regulation of flavonol biosynthetic process
GO:0009687	0.0106245	0.998881	3	68	abscisic acid metabolic process	BP	0.577957	BP abscisic acid metabolic process
GO:0043288	0.0106245	0.998881	3	68	apocarotenoid metabolic process	BP	0.577957	BP apocarotenoid metabolic process
GO:1902644	0.0106245	0.998881	3	68	tertiary alcohol metabolic process	BP	0.577957	BP tertiary alcohol metabolic process
GO:0009808	0.0106988	0.997806	5	205	lignin metabolic process	BP	0.577957	BP lignin metabolic process
GO:1901605	0.0107112	0.995757	12	894	alpha-amino acid metabolic process	BP	0.577957	BP alpha-amino acid metabolic process
GO:0007538	0.0111137	1	1	1	primary sex determination	BP	0.57872	BP primary sex determination
GO:0007542	0.0111137	1	1	1	primary sex determination, germ-line	BP	0.57872	BP primary sex determination, germ-line
GO:0019100	0.0111137	1	1	1	male germ-line sex determination	BP	0.57872	BP male germ-line sex determination
GO:0030238	0.0111137	1	1	1	male sex determination	BP	0.57872	BP male sex determination
GO:0060718	0.0111137	1	1	1	chorionic trophoblast cell differentiation	BP	0.57872	BP chorionic trophoblast cell differentiation
GO:1900744	0.0111137	1	1	1	regulation of p38MAPK cascade	BP	0.57872	BP regulation of p38MAPK cascade
GO:1900745	0.0111137	1	1	1	positive regulation of p38MAPK cascade	BP	0.57872	BP positive regulation of p38MAPK cascade
GO:0080108	0.0111857	1	1	1	S-alkylthiohydroximate lyase activity	MF	0.57872	MF S-alkylthiohydroximate lyase activity
GO:0004147	0.0111857	1	1	1	dihydrolipoamide branched chain acyltransferase activity	MF	0.57872	MF dihydrolipoamide branched chain acyltransferase activity
GO:0043754	0.0111857	1	1	1	dihydrolipoyllysine-residue (2-methylpropanoyl)transferase activity	MF	0.57872	MF dihydrolipoyllysine-residue (2-methylpropanoyl)transferase activity
GO:0034754	0.011219	0.99819	4	137	cellular hormone metabolic process	BP	0.57872	BP cellular hormone metabolic process
GO:0009414	0.0113553	0.995915	10	566	response to water deprivation	BP	0.583421	BP response to water deprivation
GO:0071478	0.0115118	0.997598	5	193	cellular response to radiation	BP	0.588015	BP cellular response to radiation
GO:0006520	0.011536	0.994704	16	1347	cellular amino acid metabolic process	BP	0.588015	BP cellular amino acid metabolic process
GO:0051553	0.0119248	0.999399	2	27	flavone biosynthetic process	BP	0.600713	BP flavone biosynthetic process
GO:0051554	0.0119248	0.999399	2	27	flavonol metabolic process	BP	0.600713	BP flavonol metabolic process
GO:0051555	0.0119248	0.999399	2	27	flavonol biosynthetic process	BP	0.600713	BP flavonol biosynthetic process
GO:0000976	0.0120914	0.99867	3	60	transcription regulatory region sequence-specific DNA binding	MF	0.606735	MF transcription regulatory region sequence-specific DNA binding
GO:0051552	0.0122274	0.999374	2	28	flavone metabolic process	BP	0.610729	BP flavone metabolic process
GO:0008483	0.0124903	0.997918	4	146	transaminase activity	MF	0.610729	MF transaminase activity
GO:0016872	0.0126113	0.999347	2	26	intramolecular lyase activity	MF	0.610729	MF intramolecular lyase activity
GO:1901617	0.0126875	0.995976	8	453	organic hydroxy compound biosynthetic process	BP	0.610729	BP organic hydroxy compound biosynthetic process
GO:0009514	0.0127309	0.998565	3	73	glyoxysome	CC	0.610729	CC glyoxysome
GO:0080167	0.0128726	0.996726	6	289	response to karrikin	BP	0.610729	BP response to karrikin
GO:0032793	0.0130038	0.999958	1	2	positive regulation of CREB transcription factor activity	BP	0.610729	BP positive regulation of CREB transcription factor activity
GO:0035924	0.0130038	0.999958	1	2	cellular response to vascular endothelial growth factor stimulus	BP	0.610729	BP cellular response to vascular endothelial growth factor stimulus
GO:0038033	0.0130038	0.999958	1	2	positive regulation of endothelial cell chemotaxis by VEGF-activated vascular endothelial growth factor receptor signaling pathway	BP	0.610729	BP positive regulation of endothelial cell chemotaxis by VEGF-activated vascular endothelial growth factor receptor signaling pathway
GO:0038084	0.0130038	0.999958	1	2	vascular endothelial growth factor signaling pathway	BP	0.610729	BP vascular endothelial growth factor signaling pathway
GO:0038089	0.0130038	0.999958	1	2	positive regulation of cell migration by vascular endothelial growth factor signaling pathway	BP	0.610729	BP positive regulation of cell migration by vascular endothelial growth factor signaling pathway
GO:0048010	0.0130038	0.999958	1	2	vascular endothelial growth factor receptor signaling pathway	BP	0.610729	BP vascular endothelial growth factor receptor signaling pathway
GO:0090045	0.0130038	0.999958	1	2	positive regulation of deacetylase activity	BP	0.610729	BP positive regulation of deacetylase activity
GO:1901725	0.0130038	0.999958	1	2	regulation of histone deacetylase activity	BP	0.610729	BP regulation of histone deacetylase activity
GO:1901727	0.0130038	0.999958	1	2	positive regulation of histone deacetylase activity	BP	0.610729	BP positive regulation of histone deacetylase activity
GO:2001026	0.0130038	0.999958	1	2	regulation of endothelial cell chemotaxis	BP	0.610729	BP regulation of endothelial cell chemotaxis
GO:2001028	0.0130038	0.999958	1	2	positive regulation of endothelial cell chemotaxis	BP	0.610729	BP positive regulation of endothelial cell chemotaxis
GO:0016769	0.0130235	0.997803	4	147	transferase activity, transferring nitrogenous groups	MF	0.610729	MF transferase activity, transferring nitrogenous groups
GO:0009411	0.0130711	0.996668	6	261	response to UV	BP	0.610743	BP response to UV
GO:0009415	0.0131852	0.995148	10	578	response to water	BP	0.61385	BP response to water
GO:0044262	0.0132496	0.993824	16	1258	cellular carbohydrate metabolic process	BP	0.61463	BP cellular carbohydrate metabolic process
GO:0005975	0.0134627	0.992001	33	3364	carbohydrate metabolic process	BP	0.621312	BP carbohydrate metabolic process
GO:0004793	0.0135136	0.999954	1	2	threonine aldolase activity	MF	0.621312	MF threonine aldolase activity
GO:0046174	0.0135382	0.998438	3	75	polyol catabolic process	BP	0.621312	BP polyol catabolic process
GO:0009962	0.0137915	0.998406	3	62	regulation of flavonoid biosynthetic process	BP	0.630694	BP regulation of flavonoid biosynthetic process
GO:0052651	0.0140185	0.999934	1	3	monoacylglycerol catabolic process	BP	0.638806	BP monoacylglycerol catabolic process
GO:0008194	0.0144994	0.99458	10	695	UDP-glycosyltransferase activity	MF	0.658394	MF UDP-glycosyltransferase activity
GO:0009611	0.0148286	0.995164	8	473	response to wounding	BP	0.670981	BP response to wounding
GO:0030599	0.0154968	0.996514	5	228	pectinesterase activity	MF	0.698765	MF pectinesterase activity
GO:0080027	0.0158573	0.999916	1	3	response to herbivore	BP	0.712527	BP response to herbivore
GO:0046462	0.0159515	0.999904	1	4	monoacylglycerol metabolic process	BP	0.714275	BP monoacylglycerol metabolic process
GO:0016053	0.0167028	0.991627	18	1629	organic acid biosynthetic process	BP	0.742756	BP organic acid biosynthetic process
GO:0046394	0.0167028	0.991627	18	1629	carboxylic acid biosynthetic process	BP	0.742756	BP carboxylic acid biosynthetic process
GO:0004066	0.0169898	0.998964	2	29	asparagine synthase (glutamine-hydrolyzing) activity	MF	0.752921	MF asparagine synthase (glutamine-hydrolyzing) activity
GO:0016042	0.0170638	0.993848	9	624	lipid catabolic process	BP	0.753613	BP lipid catabolic process
GO:0006147	0.0174396	0.999886	1	4	guanine catabolic process	BP	0.762377	BP guanine catabolic process
GO:0008892	0.0174396	0.999886	1	4	guanine deaminase activity	MF	0.762377	MF guanine deaminase activity
GO:0046098	0.0174396	0.999886	1	4	guanine metabolic process	BP	0.762377	BP guanine metabolic process
GO:0031406	0.0177324	0.99516	6	317	carboxylic acid binding	MF	0.769958	MF carboxylic acid binding
GO:0043177	0.0177324	0.99516	6	317	organic acid binding	MF	0.769958	MF organic acid binding
GO:0010976	0.0178054	0.999881	1	4	positive regulation of neuron projection development	BP	0.770533	BP positive regulation of neuron projection development
GO:0006529	0.0180088	0.998864	2	31	asparagine biosynthetic process	BP	0.77554	BP asparagine biosynthetic process
GO:0071489	0.0180414	0.997683	3	76	cellular response to red or far red light	BP	0.77554	BP cellular response to red or far red light
GO:0034644	0.0181252	0.998855	2	30	cellular response to UV	BP	0.776552	BP cellular response to UV
GO:0007568	0.0185598	0.994248	7	385	aging	BP	0.792538	BP aging
GO:0016709	0.0195761	0.99533	5	229	oxidoreductase activity, acting on paired donors, with incorporation or reduction of molecular oxygen, NAD(P)H as one donor, and incorporation of one atom of oxygen	MF	0.833179	MF oxidoreductase activity, acting on paired donors, with incorporation or reduction of molecular oxygen, NAD(P)H as one donor, and incorporation of one atom of oxygen
GO:0071475	0.0203492	0.999861	1	3	cellular hyperosmotic salinity response	BP	0.863233	BP cellular hyperosmotic salinity response
GO:0019842	0.0205455	0.996024	4	172	vitamin binding	MF	0.868703	MF vitamin binding
GO:0006714	0.0210277	0.997127	3	92	sesquiterpenoid metabolic process	BP	0.884062	BP sesquiterpenoid metabolic process
GO:0010150	0.0210458	0.994894	5	203	leaf senescence	BP	0.884062	BP leaf senescence
GO:0010160	0.0214763	0.998524	2	27	formation of organ boundary	BP	0.896032	BP formation of organ boundary
GO:0008252	0.0215433	0.9985	2	34	nucleotidase activity	MF	0.896032	MF nucleotidase activity
GO:0010837	0.0216097	0.999843	1	3	regulation of keratinocyte proliferation	BP	0.896032	BP regulation of keratinocyte proliferation
GO:0043536	0.0216588	0.999843	1	3	positive regulation of blood vessel endothelial cell migration	BP	0.896032	BP positive regulation of blood vessel endothelial cell migration
GO:0048859	0.0218574	0.998481	2	28	formation of anatomical boundary	BP	0.896032	BP formation of anatomical boundary
GO:0016702	0.0220675	0.996925	3	100	oxidoreductase activity, acting on single donors with incorporation of molecular oxygen, incorporation of two atoms of oxygen	MF	0.896032	MF oxidoreductase activity, acting on single donors with incorporation of molecular oxygen, incorporation of two atoms of oxygen
GO:0006059	0.0222341	0.999875	1	2	hexitol metabolic process	BP	0.896032	BP hexitol metabolic process
GO:0009025	0.0222341	0.999875	1	2	tagatose-bisphosphate aldolase activity	MF	0.896032	MF tagatose-bisphosphate aldolase activity
GO:0019402	0.0222341	0.999875	1	2	galactitol metabolic process	BP	0.896032	BP galactitol metabolic process
GO:0019404	0.0222341	0.999875	1	2	galactitol catabolic process	BP	0.896032	BP galactitol catabolic process
GO:0019407	0.0222341	0.999875	1	2	hexitol catabolic process	BP	0.896032	BP hexitol catabolic process
GO:2001058	0.0222341	0.999875	1	2	D-tagatose 6-phosphate metabolic process	BP	0.896032	BP D-tagatose 6-phosphate metabolic process
GO:2001059	0.0222341	0.999875	1	2	D-tagatose 6-phosphate catabolic process	BP	0.896032	BP D-tagatose 6-phosphate catabolic process
GO:0006949	0.0225303	0.998377	2	44	syncytium formation	BP	0.900381	BP syncytium formation
GO:0010200	0.0226485	0.994402	5	199	response to chitin	BP	0.900381	BP response to chitin
GO:0009083	0.0226839	0.99837	2	37	branched-chain amino acid catabolic process	BP	0.900381	BP branched-chain amino acid catabolic process
GO:0010189	0.0227609	0.998372	2	32	vitamin E biosynthetic process	BP	0.900381	BP vitamin E biosynthetic process
GO:0042360	0.0227609	0.998372	2	32	vitamin E metabolic process	BP	0.900381	BP vitamin E metabolic process
GO:0042362	0.0227609	0.998372	2	32	fat-soluble vitamin biosynthetic process	BP	0.900381	BP fat-soluble vitamin biosynthetic process
GO:0043611	0.0230705	0.999799	1	4	isoprene metabolic process	BP	0.904306	BP isoprene metabolic process
GO:0043612	0.0230705	0.999799	1	4	isoprene biosynthetic process	BP	0.904306	BP isoprene biosynthetic process
GO:0071485	0.0230705	0.999799	1	4	cellular response to absence of light	BP	0.904306	BP cellular response to absence of light
GO:0032890	0.0239595	0.999769	1	5	regulation of organic acid transport	BP	0.927872	BP regulation of organic acid transport
GO:0051952	0.0239595	0.999769	1	5	regulation of amine transport	BP	0.927872	BP regulation of amine transport
GO:0051955	0.0239595	0.999769	1	5	regulation of amino acid transport	BP	0.927872	BP regulation of amino acid transport
GO:0080143	0.0239595	0.999769	1	5	regulation of amino acid export	BP	0.927872	BP regulation of amino acid export
GO:0009112	0.0248016	0.996394	3	92	nucleobase metabolic process	BP	0.956389	BP nucleobase metabolic process
GO:0009690	0.0249095	0.996366	3	100	cytokinin metabolic process	BP	0.956389	BP cytokinin metabolic process
GO:0009628	0.0249183	0.984169	36	3543	response to abiotic stimulus	BP	0.956389	BP response to abiotic stimulus
GO:0001560	0.0253304	0.999784	1	3	regulation of cell growth by extracellular stimulus	BP	0.96932	BP regulation of cell growth by extracellular stimulus
GO:0072330	0.0256016	0.989535	10	757	monocarboxylic acid biosynthetic process	BP	0.9768	BP monocarboxylic acid biosynthetic process
GO:0015979	0.0260602	0.993306	5	252	photosynthesis	BP	0.989276	BP photosynthesis
GO:0031540	0.026082	0.997982	2	37	regulation of anthocyanin biosynthetic process	BP	0.989276	BP regulation of anthocyanin biosynthetic process
GO:0006775	0.0264448	0.997943	2	35	fat-soluble vitamin metabolic process	BP	1	BP fat-soluble vitamin metabolic process
GO:0009639	0.0270146	0.9919	6	311	response to red or far red light	BP	1	BP response to red or far red light
GO:0004620	0.0273358	0.994242	4	155	phospholipase activity	MF	1	MF phospholipase activity
GO:0071474	0.0275558	0.999694	1	5	cellular hyperosmotic response	BP	1	BP cellular hyperosmotic response
GO:0009056	0.0277585	0.982324	35	3685	catabolic process	BP	1	BP catabolic process
GO:0010595	0.0282309	0.999699	1	4	positive regulation of endothelial cell migration	BP	1	BP positive regulation of endothelial cell migration
GO:1901659	0.0284174	0.990391	7	470	glycosyl compound biosynthetic process	BP	1	BP glycosyl compound biosynthetic process
GO:0016868	0.0284975	0.997679	2	41	intramolecular transferase activity, phosphotransferases	MF	1	MF intramolecular transferase activity, phosphotransferases
GO:0048609	0.0288103	0.991235	6	308	multicellular organismal reproductive process	BP	1	BP multicellular organismal reproductive process
GO:0010224	0.0302818	0.993418	4	155	response to UV-B	BP	1	BP response to UV-B
GO:0045669	0.0307302	0.999603	1	6	positive regulation of osteoblast differentiation	BP	1	BP positive regulation of osteoblast differentiation
GO:0019438	0.0308284	0.978898	49	5227	aromatic compound biosynthetic process	BP	1	BP aromatic compound biosynthetic process
GO:0042538	0.0309165	0.995099	3	104	hyperosmotic salinity response	BP	1	BP hyperosmotic salinity response
GO:0006528	0.0309445	0.99737	2	39	asparagine metabolic process	BP	1	BP asparagine metabolic process
GO:0006811	0.0309697	0.982546	21	1884	ion transport	BP	1	BP ion transport
GO:0043392	0.0316554	0.99962	1	4	negative regulation of DNA binding	BP	1	BP negative regulation of DNA binding
GO:0015692	0.0317491	0.999618	1	4	lead ion transport	BP	1	BP lead ion transport
GO:0009699	0.0321531	0.989961	6	338	phenylpropanoid biosynthetic process	BP	1	BP phenylpropanoid biosynthetic process
GO:0003993	0.0325147	0.994753	3	95	acid phosphatase activity	MF	1	MF acid phosphatase activity
GO:0008117	0.0327284	0.999549	1	6	sphinganine-1-phosphate aldolase activity	MF	1	MF sphinganine-1-phosphate aldolase activity
GO:0032787	0.0330983	0.982807	16	1492	monocarboxylic acid metabolic process	BP	1	BP monocarboxylic acid metabolic process
GO:0042214	0.0342514	0.996923	2	40	terpene metabolic process	BP	1	BP terpene metabolic process
GO:0047890	0.0349519	0.999537	1	4	flavanone 4-reductase activity	MF	1	MF flavanone 4-reductase activity
GO:0032874	0.0350766	0.999533	1	4	positive regulation of stress-activated MAPK cascade	BP	1	BP positive regulation of stress-activated MAPK cascade
GO:0070304	0.0350766	0.999533	1	4	positive regulation of stress-activated protein kinase signaling cascade	BP	1	BP positive regulation of stress-activated protein kinase signaling cascade
GO:0046340	0.0359538	0.999477	1	5	diacylglycerol catabolic process	BP	1	BP diacylglycerol catabolic process
GO:0009423	0.0361015	0.99665	2	45	chorismate biosynthetic process	BP	1	BP chorismate biosynthetic process
GO:0042445	0.0368147	0.989646	5	267	hormone metabolic process	BP	1	BP hormone metabolic process
GO:0042128	0.0369165	0.993731	3	106	nitrate assimilation	BP	1	BP nitrate assimilation
GO:0051101	0.0369186	0.999448	1	5	regulation of DNA binding	BP	1	BP regulation of DNA binding
GO:0009820	0.0371232	0.993691	3	98	alkaloid metabolic process	BP	1	BP alkaloid metabolic process
GO:0060348	0.037165	0.999418	1	6	bone development	BP	1	BP bone development
GO:0006206	0.0371936	0.996513	2	38	pyrimidine nucleobase metabolic process	BP	1	BP pyrimidine nucleobase metabolic process
GO:0010024	0.0375725	0.999429	1	5	phytochromobilin biosynthetic process	BP	1	BP phytochromobilin biosynthetic process
GO:0051202	0.0375725	0.999429	1	5	phytochromobilin metabolic process	BP	1	BP phytochromobilin metabolic process
GO:0004392	0.0377632	0.999423	1	5	heme oxygenase (decyclizing) activity	MF	1	MF heme oxygenase (decyclizing) activity
GO:0006788	0.0377632	0.999423	1	5	heme oxidation	BP	1	BP heme oxidation
GO:0071494	0.0377632	0.999423	1	5	cellular response to UV-C	BP	1	BP cellular response to UV-C
GO:0071486	0.0380408	0.999373	1	7	cellular response to high light intensity	BP	1	BP cellular response to high light intensity
GO:0015800	0.0380531	0.996362	2	47	acidic amino acid transport	BP	1	BP acidic amino acid transport
GO:0042126	0.0383492	0.99339	3	107	nitrate metabolic process	BP	1	BP nitrate metabolic process
GO:0051761	0.038695	0.999394	1	5	sesquiterpene metabolic process	BP	1	BP sesquiterpene metabolic process
GO:0051762	0.038695	0.999394	1	5	sesquiterpene biosynthetic process	BP	1	BP sesquiterpene biosynthetic process
GO:2001057	0.0392261	0.993177	3	109	reactive nitrogen species metabolic process	BP	1	BP reactive nitrogen species metabolic process
GO:0016634	0.0401238	0.996052	2	47	oxidoreductase activity, acting on the CH-CH group of donors, oxygen as acceptor	MF	1	MF oxidoreductase activity, acting on the CH-CH group of donors, oxygen as acceptor
GO:1901362	0.0401753	0.971822	51	5594	organic cyclic compound biosynthetic process	BP	1	BP organic cyclic compound biosynthetic process
GO:0006567	0.0403411	0.999313	1	6	threonine catabolic process	BP	1	BP threonine catabolic process
GO:0050589	0.0404328	0.999378	1	4	leucocyanidin oxygenase activity	MF	1	MF leucocyanidin oxygenase activity
GO:0006066	0.0409626	0.983853	8	576	alcohol metabolic process	BP	1	BP alcohol metabolic process
GO:0090056	0.0410026	0.995952	2	37	regulation of chlorophyll metabolic process	BP	1	BP regulation of chlorophyll metabolic process
GO:1901401	0.0410026	0.995952	2	37	regulation of tetrapyrrole metabolic process	BP	1	BP regulation of tetrapyrrole metabolic process
GO:0001890	0.041229	0.999247	1	8	placenta development	BP	1	BP placenta development
GO:0080024	0.0421445	0.99928	1	5	indolebutyric acid metabolic process	BP	1	BP indolebutyric acid metabolic process
GO:0006145	0.0423254	0.999222	1	7	purine nucleobase catabolic process	BP	1	BP purine nucleobase catabolic process
GO:0010035	0.0425645	0.975527	20	1880	response to inorganic substance	BP	1	BP response to inorganic substance
GO:0006020	0.0432034	0.995561	2	52	inositol metabolic process	BP	1	BP inositol metabolic process
GO:0048520	0.0432213	0.999149	1	10	positive regulation of behavior	BP	1	BP positive regulation of behavior
GO:0050921	0.0432213	0.999149	1	10	positive regulation of chemotaxis	BP	1	BP positive regulation of chemotaxis
GO:0016874	0.0433166	0.979847	11	879	ligase activity	MF	1	MF ligase activity
GO:0046417	0.0439753	0.995443	2	50	chorismate metabolic process	BP	1	BP chorismate metabolic process
GO:0052739	0.044	0.999263	1	4	phosphatidylserine 1-acylhydrolase activity	MF	1	MF phosphatidylserine 1-acylhydrolase activity
GO:0052740	0.044	0.999263	1	4	1-acyl-2-lysophosphatidylserine acylhydrolase activity	MF	1	MF 1-acyl-2-lysophosphatidylserine acylhydrolase activity
GO:0005783	0.0440634	0.977369	14	1165	endoplasmic reticulum	CC	1	CC endoplasmic reticulum
GO:0044242	0.0443122	0.989109	4	232	cellular lipid catabolic process	BP	1	BP cellular lipid catabolic process
GO:0044271	0.0446093	0.968996	46	4970	cellular nitrogen compound biosynthetic process	BP	1	BP cellular nitrogen compound biosynthetic process
GO:0040009	0.0447091	0.9991	1	9	regulation of growth rate	BP	1	BP regulation of growth rate
GO:0009644	0.0451	0.99172	3	105	response to high light intensity	BP	1	BP response to high light intensity
GO:0016407	0.0456082	0.988722	4	172	acetyltransferase activity	MF	1	MF acetyltransferase activity
GO:0051193	0.0457297	0.995199	2	39	regulation of cofactor metabolic process	BP	1	BP regulation of cofactor metabolic process
GO:0046164	0.0458355	0.991512	3	122	alcohol catabolic process	BP	1	BP alcohol catabolic process
GO:0070013	0.0458637	0.984433	6	361	intracellular organelle lumen	CC	1	CC intracellular organelle lumen
GO:1901565	0.0460487	0.978369	11	843	organonitrogen compound catabolic process	BP	1	BP organonitrogen compound catabolic process
GO:0008479	0.0461334	0.999056	1	8	queuine tRNA-ribosyltransferase activity	MF	1	MF queuine tRNA-ribosyltransferase activity
GO:0006573	0.0466662	0.994967	2	68	valine metabolic process	BP	1	BP valine metabolic process
GO:0006778	0.0468477	0.988303	4	191	porphyrin-containing compound metabolic process	BP	1	BP porphyrin-containing compound metabolic process
GO:0030170	0.0473133	0.985754	5	308	pyridoxal phosphate binding	MF	1	MF pyridoxal phosphate binding
GO:0003985	0.0477775	0.998971	1	9	acetyl-CoA C-acetyltransferase activity	MF	1	MF acetyl-CoA C-acetyltransferase activity
GO:0050920	0.0486706	0.998898	1	12	regulation of chemotaxis	BP	1	BP regulation of chemotaxis
GO:0052638	0.0498418	0.998896	1	8	indole-3-butyrate beta-glucosyltransferase activity	MF	1	MF indole-3-butyrate beta-glucosyltransferase activity

## Sheet: cluster_7
Gene Ontology (GO) annotations for each cluster of differentially expressed genes
numDEInCat - number of differentially expressed genes in the category
numInCat = number of total genes annotated in this category
Ontologies include: Biological Process (BP), Molecular Function (MF), and Cellular Component (CC)
Cluster 10 includes genes up-regulated in linalool+ plants, including transcripts annotated as putative (R)-(-)-linalool synthase
category	over_represented_pvalue	under_represented_pvalue	numDEInCat	numInCat	term	ontology	over_represented_FDR	go_term
GO:0005576	3.06844e-09	1	19	2653	extracellular region	CC	3.95706e-05	CC extracellular region
GO:0000272	1.29633e-08	1	9	431	polysaccharide catabolic process	BP	8.35876e-05	BP polysaccharide catabolic process
GO:0045490	2.62032e-08	1	7	219	pectin catabolic process	BP	0.000112639	BP pectin catabolic process
GO:0010393	5.85253e-07	1	7	317	galacturonan metabolic process	BP	0.00144804	BP galacturonan metabolic process
GO:0045488	5.85253e-07	1	7	317	pectin metabolic process	BP	0.00144804	BP pectin metabolic process
GO:0031640	7.86002e-07	1	4	51	killing of cells of other organism	BP	0.00144804	BP killing of cells of other organism
GO:0044364	7.86002e-07	1	4	51	disruption of cells of other organism	BP	0.00144804	BP disruption of cells of other organism
GO:0001906	1.11889e-06	1	4	54	cell killing	BP	0.00180364	BP cell killing
GO:0030597	2.95242e-06	1	2	2	RNA glycosylase activity	MF	0.00380744	MF RNA glycosylase activity
GO:0030598	2.95242e-06	1	2	2	rRNA N-glycosylase activity	MF	0.00380744	MF rRNA N-glycosylase activity
GO:0016052	4.14071e-06	1	9	895	carbohydrate catabolic process	BP	0.00485441	BP carbohydrate catabolic process
GO:0052575	7.13354e-06	1	2	4	carbohydrate localization	BP	0.00707647	BP carbohydrate localization
GO:0052576	7.13354e-06	1	2	4	carbohydrate storage	BP	0.00707647	BP carbohydrate storage
GO:0008168	1.21462e-05	0.999999	8	680	methyltransferase activity	MF	0.0111884	MF methyltransferase activity
GO:0035821	1.44663e-05	1	4	100	modification of morphology or physiology of other organism	BP	0.0124372	BP modification of morphology or physiology of other organism
GO:0016741	1.58834e-05	0.999998	8	706	transferase activity, transferring one-carbon groups	MF	0.0128021	MF transferase activity, transferring one-carbon groups
GO:0030599	1.70647e-05	0.999999	5	228	pectinesterase activity	MF	0.0129451	MF pectinesterase activity
GO:0071555	1.83642e-05	0.999999	6	387	cell wall organization	BP	0.0131569	BP cell wall organization
GO:0009901	3.77495e-05	0.999999	3	36	anther dehiscence	BP	0.0256219	BP anther dehiscence
GO:0042545	4.7627e-05	0.999997	5	281	cell wall modification	BP	0.0307099	BP cell wall modification
GO:0030570	5.62298e-05	0.999999	3	45	pectate lyase activity	MF	0.0311746	MF pectate lyase activity
GO:0005976	5.6507e-05	0.999992	9	1148	polysaccharide metabolic process	BP	0.0311746	BP polysaccharide metabolic process
GO:0016837	5.73556e-05	0.999999	3	46	carbon-oxygen lyase activity, acting on polysaccharides	MF	0.0311746	MF carbon-oxygen lyase activity, acting on polysaccharides
GO:0010345	6.21917e-05	0.999999	3	42	suberin biosynthetic process	BP	0.0311746	BP suberin biosynthetic process
GO:0045330	6.3223e-05	0.999998	4	162	aspartyl esterase activity	MF	0.0311746	MF aspartyl esterase activity
GO:0045229	6.41084e-05	0.999994	6	486	external encapsulating structure organization	BP	0.0311746	BP external encapsulating structure organization
GO:0005975	6.52694e-05	0.999984	15	3364	carbohydrate metabolic process	BP	0.0311746	BP carbohydrate metabolic process
GO:0009900	6.9113e-05	0.999999	3	43	dehiscence	BP	0.0318315	BP dehiscence
GO:0042761	9.4922e-05	0.999998	3	56	very long-chain fatty acid biosynthetic process	BP	0.0422109	BP very long-chain fatty acid biosynthetic process
GO:0000038	0.000117025	0.999998	3	61	very long-chain fatty acid metabolic process	BP	0.0503053	BP very long-chain fatty acid metabolic process
GO:0004857	0.000135073	0.99999	5	347	enzyme inhibitor activity	MF	0.0561903	MF enzyme inhibitor activity
GO:0071554	0.000165182	0.999983	6	551	cell wall organization or biogenesis	BP	0.0665684	BP cell wall organization or biogenesis
GO:0034219	0.000176053	0.999996	3	65	carbohydrate transmembrane transport	BP	0.0687992	BP carbohydrate transmembrane transport
GO:0009057	0.000193577	0.999966	9	1309	macromolecule catabolic process	BP	0.0734225	BP macromolecule catabolic process
GO:0047216	0.000215681	0.999999	2	26	inositol 3-alpha-galactosyltransferase activity	MF	0.0794691	MF inositol 3-alpha-galactosyltransferase activity
GO:0010325	0.000238311	0.999998	2	19	raffinose family oligosaccharide biosynthetic process	BP	0.0850284	BP raffinose family oligosaccharide biosynthetic process
GO:0005618	0.000250549	0.999954	9	1525	cell wall	CC	0.0850284	CC cell wall
GO:0030312	0.000250549	0.999954	9	1525	external encapsulating structure	CC	0.0850284	CC external encapsulating structure
GO:0051119	0.000441424	0.999985	3	87	sugar transmembrane transporter activity	MF	0.145964	MF sugar transmembrane transporter activity
GO:0006952	0.000557042	0.999856	12	2657	defense response	BP	0.17959	BP defense response
GO:0050832	0.000623137	0.999936	5	443	defense response to fungus	BP	0.195999	BP defense response to fungus
GO:0015144	0.00101734	0.999954	3	117	carbohydrate transmembrane transporter activity	MF	0.305106	MF carbohydrate transmembrane transporter activity
GO:1901476	0.00101734	0.999954	3	117	carbohydrate transporter activity	MF	0.305106	MF carbohydrate transporter activity
GO:0043090	0.0011355	0.999983	2	40	amino acid import	BP	0.323577	BP amino acid import
GO:0052689	0.00114056	0.999865	5	530	carboxylic ester hydrolase activity	MF	0.323577	MF carboxylic ester hydrolase activity
GO:0009555	0.0011542	0.999903	4	269	pollen development	BP	0.323577	BP pollen development
GO:0008378	0.00118989	0.999943	3	160	galactosyltransferase activity	MF	0.326486	MF galactosyltransferase activity
GO:0016798	0.001281	0.999766	7	1218	hydrolase activity, acting on glycosyl bonds	MF	0.344161	MF hydrolase activity, acting on glycosyl bonds
GO:0005887	0.00187429	0.999895	3	157	integral component of plasma membrane	CC	0.493282	CC integral component of plasma membrane
GO:0017148	0.00221613	0.999953	2	49	negative regulation of translation	BP	0.567375	BP negative regulation of translation
GO:0015293	0.0022438	0.999774	4	376	symporter activity	MF	0.567375	MF symporter activity
GO:0035250	0.00229119	0.99995	2	54	UDP-galactosyltransferase activity	MF	0.568214	MF UDP-galactosyltransferase activity
GO:0009607	0.00238614	0.999396	9	1931	response to biotic stimulus	BP	0.580598	BP response to biotic stimulus
GO:0009620	0.0024876	0.999648	5	613	response to fungus	BP	0.594075	BP response to fungus
GO:0006012	0.00282455	0.999931	2	69	galactose metabolic process	BP	0.662281	BP galactose metabolic process
GO:0015171	0.00287844	0.999811	3	188	amino acid transmembrane transporter activity	MF	0.662863	MF amino acid transmembrane transporter activity
GO:0048479	0.00311252	0.999998	1	2	style development	BP	0.687989	BP style development
GO:0015849	0.00314759	0.999652	4	408	organic acid transport	BP	0.687989	BP organic acid transport
GO:0046942	0.00314759	0.999652	4	408	carboxylic acid transport	BP	0.687989	BP carboxylic acid transport
GO:0048229	0.00398933	0.999529	4	390	gametophyte development	BP	0.85744	BP gametophyte development
GO:0070417	0.00415214	0.999877	2	54	cellular response to cold	BP	0.866527	BP cellular response to cold
GO:0008422	0.004166	0.999688	3	216	beta-glucosidase activity	MF	0.866527	MF beta-glucosidase activity
GO:0022891	0.00437393	0.998786	9	2133	substrate-specific transmembrane transporter activity	MF	0.895337	MF substrate-specific transmembrane transporter activity
GO:0030234	0.00457386	0.999253	5	691	enzyme regulator activity	MF	0.921633	MF enzyme regulator activity
GO:0008447	0.00583512	0.999987	1	4	L-ascorbate oxidase activity	MF	1	MF L-ascorbate oxidase activity
GO:0015226	0.00590425	0.999989	1	3	carnitine transmembrane transporter activity	MF	1	MF carnitine transmembrane transporter activity
GO:1902603	0.00590425	0.999989	1	3	carnitine transmembrane transport	BP	1	BP carnitine transmembrane transport
GO:0006865	0.00611262	0.999475	3	255	amino acid transport	BP	1	BP amino acid transport
GO:0015711	0.00623479	0.999164	4	476	organic anion transport	BP	1	BP organic anion transport
GO:0015199	0.00642184	0.999985	1	4	amino-acid betaine transmembrane transporter activity	MF	1	MF amino-acid betaine transmembrane transporter activity
GO:0015879	0.00646608	0.999985	1	4	carnitine transport	BP	1	BP carnitine transport
GO:0006820	0.00665547	0.998811	5	782	anion transport	BP	1	BP anion transport
GO:0015651	0.00684158	0.999982	1	5	quaternary ammonium group transmembrane transporter activity	MF	1	MF quaternary ammonium group transmembrane transporter activity
GO:0015838	0.00698339	0.999981	1	5	amino-acid betaine transport	BP	1	BP amino-acid betaine transport
GO:0071836	0.00739897	0.99998	1	4	nectar secretion	BP	1	BP nectar secretion
GO:0071705	0.00740425	0.998643	5	793	nitrogen compound transport	BP	1	BP nitrogen compound transport
GO:0016799	0.00747051	0.999698	2	91	hydrolase activity, hydrolyzing N-glycosyl compounds	MF	1	MF hydrolase activity, hydrolyzing N-glycosyl compounds
GO:0032588	0.00798478	0.999974	1	6	trans-Golgi network membrane	CC	1	CC trans-Golgi network membrane
GO:0005342	0.00831633	0.999201	3	271	organic acid transmembrane transporter activity	MF	1	MF organic acid transmembrane transporter activity
GO:0046943	0.00831633	0.999201	3	271	carboxylic acid transmembrane transporter activity	MF	1	MF carboxylic acid transmembrane transporter activity
GO:0022892	0.00871934	0.997302	9	2360	substrate-specific transporter activity	MF	1	MF substrate-specific transporter activity
GO:1901575	0.00933982	0.996715	11	3315	organic substance catabolic process	BP	1	BP organic substance catabolic process
GO:0010777	0.009852	0.999959	1	7	meiotic mismatch repair involved in reciprocal meiotic recombination	BP	1	BP meiotic mismatch repair involved in reciprocal meiotic recombination
GO:0004167	0.0102691	0.999958	1	5	dopachrome isomerase activity	MF	1	MF dopachrome isomerase activity
GO:0050178	0.0102691	0.999958	1	5	phenylpyruvate tautomerase activity	MF	1	MF phenylpyruvate tautomerase activity
GO:0044702	0.0110465	0.996709	8	1931	single organism reproductive process	BP	1	BP single organism reproductive process
GO:0022857	0.0112582	0.996369	9	2485	transmembrane transporter activity	MF	1	MF transmembrane transporter activity
GO:0015926	0.0113922	0.99877	3	341	glucosidase activity	MF	1	MF glucosidase activity
GO:0048480	0.0116568	0.999944	1	6	stigma development	BP	1	BP stigma development
GO:0052694	0.0116568	0.999944	1	6	jasmonoyl-isoleucine-12-hydroxylase activity	MF	1	MF jasmonoyl-isoleucine-12-hydroxylase activity
GO:0060919	0.0121601	0.999936	1	8	auxin influx	BP	1	BP auxin influx
GO:0010254	0.0123461	0.999934	1	8	nectary development	BP	1	BP nectary development
GO:0098542	0.012642	0.996887	6	1239	defense response to other organism	BP	1	BP defense response to other organism
GO:0009664	0.0127648	0.999316	2	119	plant-type cell wall organization	BP	1	BP plant-type cell wall organization
GO:0015697	0.0138029	0.999918	1	8	quaternary ammonium group transport	BP	1	BP quaternary ammonium group transport
GO:0008643	0.0139431	0.99838	3	313	carbohydrate transport	BP	1	BP carbohydrate transport
GO:0048609	0.0141482	0.998347	3	308	multicellular organismal reproductive process	BP	1	BP multicellular organismal reproductive process
GO:0009699	0.0151587	0.998182	3	338	phenylpropanoid biosynthetic process	BP	1	BP phenylpropanoid biosynthetic process
GO:0008514	0.0153956	0.998143	3	328	organic anion transmembrane transporter activity	MF	1	MF organic anion transmembrane transporter activity
GO:0008509	0.0158032	0.997222	4	641	anion transmembrane transporter activity	MF	1	MF anion transmembrane transporter activity
GO:0042973	0.0161226	0.999023	2	117	glucan endo-1,3-beta-D-glucosidase activity	MF	1	MF glucan endo-1,3-beta-D-glucosidase activity
GO:0032269	0.0163087	0.999006	2	121	negative regulation of cellular protein metabolic process	BP	1	BP negative regulation of cellular protein metabolic process
GO:0004553	0.0176842	0.99598	5	1123	hydrolase activity, hydrolyzing O-glycosyl compounds	MF	1	MF hydrolase activity, hydrolyzing O-glycosyl compounds
GO:0045143	0.0182033	0.999848	1	14	homologous chromosome segregation	BP	1	BP homologous chromosome segregation
GO:0009056	0.0193769	0.992411	11	3685	catabolic process	BP	1	BP catabolic process
GO:0016862	0.0195029	0.999826	1	13	intramolecular oxidoreductase activity, interconverting keto- and enol-groups	MF	1	MF intramolecular oxidoreductase activity, interconverting keto- and enol-groups
GO:0010052	0.0197254	0.999823	1	12	guard cell differentiation	BP	1	BP guard cell differentiation
GO:0009312	0.0199025	0.99865	2	145	oligosaccharide biosynthetic process	BP	1	BP oligosaccharide biosynthetic process
GO:0004338	0.019918	0.999817	1	14	glucan exo-1,3-beta-glucosidase activity	MF	1	MF glucan exo-1,3-beta-glucosidase activity
GO:0051248	0.0208476	0.998551	2	143	negative regulation of protein metabolic process	BP	1	BP negative regulation of protein metabolic process
GO:0072349	0.021201	0.999792	1	15	modified amino acid transmembrane transporter activity	MF	1	MF modified amino acid transmembrane transporter activity
GO:0003333	0.0212291	0.998512	2	126	amino acid transmembrane transport	BP	1	BP amino acid transmembrane transport
GO:0048354	0.0235673	0.999742	1	16	mucilage biosynthetic process involved in seed coat development	BP	1	BP mucilage biosynthetic process involved in seed coat development
GO:0000795	0.024012	0.999733	1	15	synaptonemal complex	CC	1	CC synaptonemal complex
GO:0016712	0.0249258	0.999707	1	20	oxidoreductase activity, acting on paired donors, with incorporation or reduction of molecular oxygen, reduced flavin or flavoprotein as one donor, and incorporation of one atom of oxygen	MF	1	MF oxidoreductase activity, acting on paired donors, with incorporation or reduction of molecular oxygen, reduced flavin or flavoprotein as one donor, and incorporation of one atom of oxygen
GO:0070330	0.0249258	0.999707	1	20	aromatase activity	MF	1	MF aromatase activity
GO:0044550	0.0269082	0.995991	3	438	secondary metabolite biosynthetic process	BP	1	BP secondary metabolite biosynthetic process
GO:0009860	0.0270283	0.997841	2	156	pollen tube growth	BP	1	BP pollen tube growth
GO:0008515	0.0275934	0.999648	1	14	sucrose transmembrane transporter activity	MF	1	MF sucrose transmembrane transporter activity
GO:0016835	0.028265	0.995708	3	484	carbon-oxygen lyase activity	MF	1	MF carbon-oxygen lyase activity
GO:0009698	0.0294293	0.995462	3	456	phenylpropanoid metabolic process	BP	1	BP phenylpropanoid metabolic process
GO:0010374	0.0295297	0.999592	1	17	stomatal complex development	BP	1	BP stomatal complex development
GO:0090558	0.0295297	0.999592	1	17	plant epidermis development	BP	1	BP plant epidermis development
GO:0080054	0.0296648	0.999579	1	26	low-affinity nitrate transmembrane transporter activity	MF	1	MF low-affinity nitrate transmembrane transporter activity
GO:0080055	0.0296648	0.999579	1	26	low-affinity nitrate transport	BP	1	BP low-affinity nitrate transport
GO:0043073	0.0297855	0.999583	1	18	germ cell nucleus	CC	1	CC germ cell nucleus
GO:0015291	0.0302617	0.993524	4	775	secondary active transmembrane transporter activity	MF	1	MF secondary active transmembrane transporter activity
GO:0015154	0.030702	0.99956	1	16	disaccharide transmembrane transporter activity	MF	1	MF disaccharide transmembrane transporter activity
GO:0015157	0.030702	0.99956	1	16	oligosaccharide transmembrane transporter activity	MF	1	MF oligosaccharide transmembrane transporter activity
GO:0010328	0.0309405	0.999543	1	24	auxin influx transmembrane transporter activity	MF	1	MF auxin influx transmembrane transporter activity
GO:0022414	0.0309701	0.988841	8	2349	reproductive process	BP	1	BP reproductive process
GO:0015770	0.0311363	0.999543	1	19	sucrose transport	BP	1	BP sucrose transport
GO:0055085	0.0319692	0.989277	7	1871	transmembrane transport	BP	1	BP transmembrane transport
GO:0010192	0.03281	0.999487	1	23	mucilage biosynthetic process	BP	1	BP mucilage biosynthetic process
GO:0005215	0.0334507	0.98699	9	3000	transporter activity	MF	1	MF transporter activity
GO:0015766	0.0342338	0.999444	1	21	disaccharide transport	BP	1	BP disaccharide transport
GO:0015772	0.0342338	0.999444	1	21	oligosaccharide transport	BP	1	BP oligosaccharide transport
GO:0007275	0.0361779	0.991818	4	751	multicellular organismal development	BP	1	BP multicellular organismal development
GO:0045132	0.0388952	0.999271	1	29	meiotic chromosome segregation	BP	1	BP meiotic chromosome segregation
GO:0048440	0.0392719	0.999264	1	23	carpel development	BP	1	BP carpel development
GO:0018685	0.0404275	0.999215	1	26	alkane 1-monooxygenase activity	MF	1	MF alkane 1-monooxygenase activity
GO:0000710	0.0407932	0.999202	1	25	meiotic mismatch repair	BP	1	BP meiotic mismatch repair
GO:0010582	0.0411972	0.999183	1	28	floral meristem determinacy	BP	1	BP floral meristem determinacy
GO:0009827	0.0427153	0.999122	1	27	plant-type cell wall modification	BP	1	BP plant-type cell wall modification
GO:0016713	0.0427856	0.999119	1	27	oxidoreductase activity, acting on paired donors, with incorporation or reduction of molecular oxygen, reduced iron-sulfur protein as one donor, and incorporation of one atom of oxygen	MF	1	MF oxidoreductase activity, acting on paired donors, with incorporation or reduction of molecular oxygen, reduced iron-sulfur protein as one donor, and incorporation of one atom of oxygen
GO:0016863	0.0431331	0.999099	1	32	intramolecular oxidoreductase activity, transposing C=C bonds	MF	1	MF intramolecular oxidoreductase activity, transposing C=C bonds
GO:0051026	0.0431699	0.999109	1	23	chiasma assembly	BP	1	BP chiasma assembly
GO:0006633	0.0444101	0.991961	3	557	fatty acid biosynthetic process	BP	1	BP fatty acid biosynthetic process
GO:0006950	0.0457131	0.976737	16	6690	response to stress	BP	1	BP response to stress
GO:0009341	0.0457179	0.999006	1	20	beta-galactosidase complex	CC	1	CC beta-galactosidase complex
GO:0000794	0.046045	0.998971	1	33	condensed nuclear chromosome	CC	1	CC condensed nuclear chromosome
GO:0048610	0.0464893	0.988618	4	844	NA	NA	1	none
GO:0048046	0.0476502	0.988238	4	986	apoplast	CC	1	CC apoplast
GO:0009932	0.0480159	0.994755	2	222	cell tip growth	BP	1	BP cell tip growth
GO:0032300	0.0484618	0.998865	1	29	mismatch repair complex	CC	1	CC mismatch repair complex
GO:0051707	0.0485912	0.983718	6	1717	response to other organism	BP	1	BP response to other organism
GO:1901618	0.0499877	0.998785	1	34	organic hydroxy compound transmembrane transporter activity	MF	1	MF organic hydroxy compound transmembrane transporter activity

## Sheet: cluster_8
Gene Ontology (GO) annotations for each cluster of differentially expressed genes
numDEInCat - number of differentially expressed genes in the category
numInCat = number of total genes annotated in this category
Ontologies include: Biological Process (BP), Molecular Function (MF), and Cellular Component (CC)
Cluster 10 includes genes up-regulated in linalool+ plants, including transcripts annotated as putative (R)-(-)-linalool synthase
category	over_represented_pvalue	under_represented_pvalue	numDEInCat	numInCat	term	ontology	over_represented_FDR	go_term
GO:0080054	3.37985e-08	1	5	26	low-affinity nitrate transmembrane transporter activity	MF	0.000217932	MF low-affinity nitrate transmembrane transporter activity
GO:0080055	3.37985e-08	1	5	26	low-affinity nitrate transport	BP	0.000217932	BP low-affinity nitrate transport
GO:0015706	2.78894e-05	0.999999	5	89	nitrate transport	BP	0.0768472	BP nitrate transport
GO:0015112	2.85269e-05	0.999998	5	90	nitrate transmembrane transporter activity	MF	0.0768472	MF nitrate transmembrane transporter activity
GO:0015833	3.06233e-05	0.999998	6	141	peptide transport	BP	0.0768472	BP peptide transport
GO:0044699	3.5754e-05	0.999981	118	19190	single-organism process	BP	0.0768472	BP single-organism process
GO:0042886	6.93329e-05	0.999994	6	158	amide transport	BP	0.115228	BP amide transport
GO:0006564	7.14814e-05	0.999999	3	25	L-serine biosynthetic process	BP	0.115228	BP L-serine biosynthetic process
GO:0004474	0.000125949	1	2	4	malate synthase activity	MF	0.156905	MF malate synthase activity
GO:0015103	0.000129596	0.999983	7	243	inorganic anion transmembrane transporter activity	MF	0.156905	MF inorganic anion transmembrane transporter activity
GO:0042128	0.000141108	0.999989	5	106	nitrate assimilation	BP	0.156905	BP nitrate assimilation
GO:0042126	0.000151525	0.999988	5	107	nitrate metabolic process	BP	0.156905	BP nitrate metabolic process
GO:2001057	0.000158171	0.999988	5	109	reactive nitrogen species metabolic process	BP	0.156905	BP reactive nitrogen species metabolic process
GO:0005886	0.000182894	0.999909	47	5965	plasma membrane	CC	0.168472	CC plasma membrane
GO:0044763	0.00021021	0.999879	92	14471	single-organism cellular process	BP	0.180403	BP single-organism cellular process
GO:0021700	0.000223825	0.999975	6	204	developmental maturation	BP	0.180403	BP developmental maturation
GO:0016021	0.000294244	0.999837	66	9565	integral component of membrane	CC	0.22321	CC integral component of membrane
GO:0071941	0.000347496	0.999968	5	131	nitrogen cycle metabolic process	BP	0.248961	BP nitrogen cycle metabolic process
GO:0003774	0.000452176	0.999929	7	277	motor activity	MF	0.306908	MF motor activity
GO:0050004	0.000478075	0.999996	2	8	isoflavone 7-O-glucosyltransferase activity	MF	0.308263	MF isoflavone 7-O-glucosyltransferase activity
GO:0044710	0.000612216	0.999647	69	10476	single-organism metabolic process	BP	0.375959	BP single-organism metabolic process
GO:0044262	0.000771529	0.999744	15	1258	cellular carbohydrate metabolic process	BP	0.433041	BP cellular carbohydrate metabolic process
GO:0006081	0.000794482	0.999912	5	153	cellular aldehyde metabolic process	BP	0.433041	BP cellular aldehyde metabolic process
GO:0019305	0.000839488	0.99999	2	10	dTDP-rhamnose biosynthetic process	BP	0.433041	BP dTDP-rhamnose biosynthetic process
GO:0046383	0.000839488	0.99999	2	10	dTDP-rhamnose metabolic process	BP	0.433041	BP dTDP-rhamnose metabolic process
GO:0005975	0.000915803	0.999579	28	3364	carbohydrate metabolic process	BP	0.440465	BP carbohydrate metabolic process
GO:0005874	0.000922189	0.999788	9	511	microtubule	CC	0.440465	CC microtubule
GO:0050664	0.000998792	0.999955	3	50	oxidoreductase activity, acting on NAD(P)H, oxygen as acceptor	MF	0.460015	MF oxidoreductase activity, acting on NAD(P)H, oxygen as acceptor
GO:0080139	0.00123238	0.999984	2	8	borate efflux transmembrane transporter activity	MF	0.506889	MF borate efflux transmembrane transporter activity
GO:0010053	0.0012348	0.999894	4	92	root epidermal cell differentiation	BP	0.506889	BP root epidermal cell differentiation
GO:0010482	0.00126528	0.999981	2	13	regulation of epidermal cell division	BP	0.506889	BP regulation of epidermal cell division
GO:0006097	0.0012971	0.999937	3	45	glyoxylate cycle	BP	0.506889	BP glyoxylate cycle
GO:0046487	0.0012971	0.999937	3	45	glyoxylate metabolic process	BP	0.506889	BP glyoxylate metabolic process
GO:0005200	0.00136807	0.999878	4	117	structural constituent of cytoskeleton	MF	0.518901	MF structural constituent of cytoskeleton
GO:0004617	0.00153072	0.999974	2	20	phosphoglycerate dehydrogenase activity	MF	0.528102	MF phosphoglycerate dehydrogenase activity
GO:0051258	0.0015562	0.999856	4	126	protein polymerization	BP	0.528102	BP protein polymerization
GO:0005576	0.00155973	0.999312	23	2653	extracellular region	CC	0.528102	CC extracellular region
GO:0019432	0.00157697	0.999854	4	119	triglyceride biosynthetic process	BP	0.528102	BP triglyceride biosynthetic process
GO:0006928	0.00159708	0.999687	7	344	movement of cell or subcellular component	BP	0.528102	BP movement of cell or subcellular component
GO:0016717	0.00173099	0.999906	3	51	oxidoreductase activity, acting on paired donors, with oxidation of a pair of donors resulting in the reduction of molecular oxygen to two molecules of water	MF	0.545194	MF oxidoreductase activity, acting on paired donors, with oxidation of a pair of donors resulting in the reduction of molecular oxygen to two molecules of water
GO:0044723	0.00178806	0.999269	19	1953	single-organism carbohydrate metabolic process	BP	0.545194	BP single-organism carbohydrate metabolic process
GO:0048878	0.00183496	0.999535	9	561	chemical homeostasis	BP	0.545194	BP chemical homeostasis
GO:0047196	0.00185153	0.999896	3	62	long-chain-alcohol O-fatty-acyltransferase activity	MF	0.545194	MF long-chain-alcohol O-fatty-acyltransferase activity
GO:0008477	0.00188442	0.999965	2	14	purine nucleosidase activity	MF	0.545194	MF purine nucleosidase activity
GO:0009060	0.00190243	0.999893	3	50	aerobic respiration	BP	0.545194	BP aerobic respiration
GO:0006857	0.00200587	0.999802	4	128	oligopeptide transport	BP	0.553198	BP oligopeptide transport
GO:0046460	0.00205905	0.999795	4	126	neutral lipid biosynthetic process	BP	0.553198	BP neutral lipid biosynthetic process
GO:0046463	0.00205905	0.999795	4	126	acylglycerol biosynthetic process	BP	0.553198	BP acylglycerol biosynthetic process
GO:0007017	0.00219497	0.999484	8	470	microtubule-based process	BP	0.577679	BP microtubule-based process
GO:0015698	0.00229529	0.999593	6	300	inorganic anion transport	BP	0.58172	BP inorganic anion transport
GO:0015980	0.00230054	0.999764	4	117	energy derivation by oxidation of organic compounds	BP	0.58172	BP energy derivation by oxidation of organic compounds
GO:0004650	0.00242304	0.999747	4	128	polygalacturonase activity	MF	0.600915	MF polygalacturonase activity
GO:0006641	0.00276276	0.999701	4	143	triglyceride metabolic process	BP	0.663935	BP triglyceride metabolic process
GO:0008460	0.00278013	0.999937	2	16	dTDP-glucose 4,6-dehydratase activity	MF	0.663935	MF dTDP-glucose 4,6-dehydratase activity
GO:0044430	0.00298103	0.999004	12	968	cytoskeletal part	CC	0.698971	CC cytoskeletal part
GO:0035445	0.00316816	0.999923	2	15	borate transmembrane transport	BP	0.704423	BP borate transmembrane transport
GO:0046713	0.00316816	0.999923	2	15	borate transport	BP	0.704423	BP borate transport
GO:0046715	0.00316816	0.999923	2	15	borate transmembrane transporter activity	MF	0.704423	MF borate transmembrane transporter activity
GO:0010290	0.0034401	0.999911	2	19	chlorophyll catabolite transmembrane transporter activity	MF	0.739393	MF chlorophyll catabolite transmembrane transporter activity
GO:0015431	0.0034401	0.999911	2	19	glutathione S-conjugate-exporting ATPase activity	MF	0.739393	MF glutathione S-conjugate-exporting ATPase activity
GO:0015198	0.00353364	0.99975	3	78	oligopeptide transporter activity	MF	0.746735	MF oligopeptide transporter activity
GO:0071997	0.00362959	0.999903	2	20	glutathione S-conjugate-transporting ATPase activity	MF	0.746735	MF glutathione S-conjugate-transporting ATPase activity
GO:0045333	0.00364798	0.99974	3	63	cellular respiration	BP	0.746735	BP cellular respiration
GO:0015197	0.00386758	0.999717	3	80	peptide transporter activity	MF	0.777747	MF peptide transporter activity
GO:0006638	0.0039804	0.999523	4	155	neutral lipid metabolic process	BP	0.777747	BP neutral lipid metabolic process
GO:0006639	0.0039804	0.999523	4	155	acylglycerol metabolic process	BP	0.777747	BP acylglycerol metabolic process
GO:0030048	0.00419279	0.999686	3	66	actin filament-based movement	BP	0.807017	BP actin filament-based movement
GO:0009514	0.00434835	0.999669	3	73	glyoxysome	CC	0.809573	CC glyoxysome
GO:0004030	0.00441128	0.999871	2	19	aldehyde dehydrogenase [NAD(P)+] activity	MF	0.809573	MF aldehyde dehydrogenase [NAD(P)+] activity
GO:0006563	0.00443165	0.999659	3	87	L-serine metabolic process	BP	0.809573	BP L-serine metabolic process
GO:0009835	0.00446061	0.999655	3	90	fruit ripening	BP	0.809573	BP fruit ripening
GO:0071695	0.00451995	0.999649	3	91	anatomical structure maturation	BP	0.809573	BP anatomical structure maturation
GO:0080029	0.00465732	0.999861	2	17	cellular response to boron-containing substance levels	BP	0.81054	BP cellular response to boron-containing substance levels
GO:0071705	0.00466517	0.998533	10	793	nitrogen compound transport	BP	0.81054	BP nitrogen compound transport
GO:0045735	0.0047139	0.999631	3	72	nutrient reservoir activity	MF	0.81054	MF nutrient reservoir activity
GO:0005452	0.00549327	0.999816	2	24	inorganic anion exchanger activity	MF	0.903157	MF inorganic anion exchanger activity
GO:0016174	0.0055698	0.99981	2	30	NAD(P)H oxidase activity	MF	0.903157	MF NAD(P)H oxidase activity
GO:0044281	0.00558915	0.996878	35	5096	small molecule metabolic process	BP	0.903157	BP small molecule metabolic process
GO:0033319	0.00567275	0.999804	2	31	UDP-D-xylose metabolic process	BP	0.903157	BP UDP-D-xylose metabolic process
GO:0033320	0.00567275	0.999804	2	31	UDP-D-xylose biosynthetic process	BP	0.903157	BP UDP-D-xylose biosynthetic process
GO:0048040	0.00567275	0.999804	2	31	UDP-glucuronate decarboxylase activity	MF	0.903157	MF UDP-glucuronate decarboxylase activity
GO:0019321	0.00604333	0.999479	3	91	pentose metabolic process	BP	0.950425	BP pentose metabolic process
GO:0042592	0.00625995	0.997818	11	952	homeostatic process	BP	0.953298	BP homeostatic process
GO:0004144	0.00630243	0.999448	3	100	diacylglycerol O-acyltransferase activity	MF	0.953298	MF diacylglycerol O-acyltransferase activity
GO:0055085	0.00633455	0.997153	18	1871	transmembrane transport	BP	0.953298	BP transmembrane transport
GO:0044425	0.00635729	0.995927	67	10924	membrane part	CC	0.953298	CC membrane part
GO:0016799	0.00750467	0.999301	3	91	hydrolase activity, hydrolyzing N-glycosyl compounds	MF	1	MF hydrolase activity, hydrolyzing N-glycosyl compounds
GO:0006148	0.00755193	1	1	1	inosine catabolic process	BP	1	BP inosine catabolic process
GO:0004648	0.00755193	1	1	1	O-phospho-L-serine:2-oxoglutarate aminotransferase activity	MF	1	MF O-phospho-L-serine:2-oxoglutarate aminotransferase activity
GO:0032593	0.00755193	1	1	1	insulin-responsive compartment	CC	1	CC insulin-responsive compartment
GO:0042732	0.00759386	0.999693	2	36	D-xylose metabolic process	BP	1	BP D-xylose metabolic process
GO:0009070	0.00823967	0.999203	3	114	serine family amino acid biosynthetic process	BP	1	BP serine family amino acid biosynthetic process
GO:0042389	0.00846217	0.999982	1	2	omega-3 fatty acid desaturase activity	MF	1	MF omega-3 fatty acid desaturase activity
GO:0008610	0.00858134	0.996327	15	1634	lipid biosynthetic process	BP	1	BP lipid biosynthetic process
GO:0005575	0.00897376	0.994803	170	33977	cellular_component	CC	1	CC cellular_component
GO:0010036	0.00904885	0.999606	2	27	response to boron-containing substance	BP	1	BP response to boron-containing substance
GO:0051749	0.00907387	0.999979	1	2	indole acetic acid carboxyl methyltransferase activity	MF	1	MF indole acetic acid carboxyl methyltransferase activity
GO:0009913	0.00913632	0.998612	4	164	epidermal cell differentiation	BP	1	BP epidermal cell differentiation
GO:0043436	0.00939921	0.995183	23	3154	oxoacid metabolic process	BP	1	BP oxoacid metabolic process
GO:0045017	0.00954102	0.998098	5	290	glycerolipid biosynthetic process	BP	1	BP glycerolipid biosynthetic process
GO:0006082	0.00992838	0.994887	23	3166	organic acid metabolic process	BP	1	BP organic acid metabolic process
GO:0016459	0.00998602	0.998966	3	101	myosin complex	CC	1	CC myosin complex
GO:0048046	0.0100672	0.996456	10	986	apoplast	CC	1	CC apoplast
GO:0008509	0.0102962	0.996862	8	641	anion transmembrane transporter activity	MF	1	MF anion transmembrane transporter activity
GO:0016651	0.0106132	0.997827	5	328	oxidoreductase activity, acting on NAD(P)H	MF	1	MF oxidoreductase activity, acting on NAD(P)H
GO:0007231	0.0106521	0.999489	2	34	osmosensory signaling pathway	BP	1	BP osmosensory signaling pathway
GO:0044275	0.010875	0.998259	4	194	cellular carbohydrate catabolic process	BP	1	BP cellular carbohydrate catabolic process
GO:0055072	0.0110467	0.998814	3	95	iron ion homeostasis	BP	1	BP iron ion homeostasis
GO:0010025	0.0110508	0.99881	3	112	wax biosynthetic process	BP	1	BP wax biosynthetic process
GO:0005871	0.0113556	0.998163	4	166	kinesin complex	CC	1	CC kinesin complex
GO:0003777	0.0115087	0.99813	4	168	microtubule motor activity	MF	1	MF microtubule motor activity
GO:0030855	0.0115159	0.998127	4	181	epithelial cell differentiation	BP	1	BP epithelial cell differentiation
GO:0050801	0.0116535	0.997105	6	377	ion homeostasis	BP	1	BP ion homeostasis
GO:0044765	0.0116786	0.993455	29	3887	single-organism transport	BP	1	BP single-organism transport
GO:0055114	0.0117543	0.994144	20	2231	oxidation-reduction process	BP	1	BP oxidation-reduction process
GO:0018316	0.0119721	0.999964	1	2	peptide cross-linking via L-cystine	BP	1	BP peptide cross-linking via L-cystine
GO:0010166	0.0126518	0.998567	3	116	wax metabolic process	BP	1	BP wax metabolic process
GO:0003934	0.0127606	0.999959	1	2	GTP cyclohydrolase I activity	MF	1	MF GTP cyclohydrolase I activity
GO:0035998	0.0127606	0.999959	1	2	7,8-dihydroneopterin 3'-triphosphate biosynthetic process	BP	1	BP 7,8-dihydroneopterin 3'-triphosphate biosynthetic process
GO:0051066	0.0127606	0.999959	1	2	dihydrobiopterin metabolic process	BP	1	BP dihydrobiopterin metabolic process
GO:0044711	0.0128615	0.992604	31	4616	single-organism biosynthetic process	BP	1	BP single-organism biosynthetic process
GO:0051669	0.013424	0.999925	1	6	fructan beta-fructosidase activity	MF	1	MF fructan beta-fructosidase activity
GO:0007018	0.0139509	0.997601	4	177	microtubule-based movement	BP	1	BP microtubule-based movement
GO:0033397	0.0149782	0.999944	1	2	zeatin metabolic process	BP	1	BP zeatin metabolic process
GO:0033398	0.0149782	0.999944	1	2	zeatin biosynthetic process	BP	1	BP zeatin biosynthetic process
GO:0033400	0.0149782	0.999944	1	2	trans-zeatin metabolic process	BP	1	BP trans-zeatin metabolic process
GO:0033466	0.0149782	0.999944	1	2	trans-zeatin biosynthetic process	BP	1	BP trans-zeatin biosynthetic process
GO:0010938	0.0150471	0.999943	1	2	cytoplasmic microtubule depolymerization	BP	1	BP cytoplasmic microtubule depolymerization
GO:0060404	0.0150471	0.999943	1	2	axonemal microtubule depolymerization	BP	1	BP axonemal microtubule depolymerization
GO:0070462	0.0150471	0.999943	1	2	plus-end specific microtubule depolymerization	BP	1	BP plus-end specific microtubule depolymerization
GO:0035176	0.0150471	0.999943	1	2	social behavior	BP	1	BP social behavior
GO:0051567	0.0152064	0.999119	2	36	histone H3-K9 methylation	BP	1	BP histone H3-K9 methylation
GO:0006073	0.015833	0.995255	7	592	cellular glucan metabolic process	BP	1	BP cellular glucan metabolic process
GO:0044042	0.015833	0.995255	7	592	glucan metabolic process	BP	1	BP glucan metabolic process
GO:0052631	0.0158823	0.999916	1	3	sphingolipid delta-8 desaturase activity	MF	1	MF sphingolipid delta-8 desaturase activity
GO:0030243	0.0164604	0.997021	4	215	cellulose metabolic process	BP	1	BP cellulose metabolic process
GO:0016411	0.0165994	0.997919	3	128	acylglycerol O-acyltransferase activity	MF	1	MF acylglycerol O-acyltransferase activity
GO:0008150	0.0167943	0.989805	169	33631	biological_process	BP	1	BP biological_process
GO:0009225	0.0171819	0.997816	3	135	nucleotide-sugar metabolic process	BP	1	BP nucleotide-sugar metabolic process
GO:0044247	0.0174271	0.997778	3	117	cellular polysaccharide catabolic process	BP	1	BP cellular polysaccharide catabolic process
GO:0006636	0.0182644	0.998826	2	43	unsaturated fatty acid biosynthetic process	BP	1	BP unsaturated fatty acid biosynthetic process
GO:0071454	0.0193004	0.999875	1	3	cellular response to anoxia	BP	1	BP cellular response to anoxia
GO:0048764	0.0195066	0.998704	2	41	trichoblast maturation	BP	1	BP trichoblast maturation
GO:0048765	0.0195066	0.998704	2	41	root hair cell differentiation	BP	1	BP root hair cell differentiation
GO:0005802	0.02005	0.993708	7	532	trans-Golgi network	CC	1	CC trans-Golgi network
GO:0018149	0.0203874	0.999826	1	6	peptide cross-linking	BP	1	BP peptide cross-linking
GO:0009691	0.0204207	0.998604	2	47	cytokinin biosynthetic process	BP	1	BP cytokinin biosynthetic process
GO:0035048	0.0206144	0.999858	1	3	splicing factor protein import into nucleus	BP	1	BP splicing factor protein import into nucleus
GO:0051507	0.021539	0.999825	1	4	beta-sitosterol UDP-glucosyltransferase activity	MF	1	MF beta-sitosterol UDP-glucosyltransferase activity
GO:0016020	0.0218894	0.984939	69	11853	membrane	CC	1	CC membrane
GO:0009251	0.0219745	0.996941	3	124	glucan catabolic process	BP	1	BP glucan catabolic process
GO:0007019	0.02226	0.999834	1	3	microtubule depolymerization	BP	1	BP microtubule depolymerization
GO:0008017	0.0225602	0.995525	4	175	microtubule binding	MF	1	MF microtubule binding
GO:0016746	0.0231045	0.99127	9	909	transferase activity, transferring acyl groups	MF	1	MF transferase activity, transferring acyl groups
GO:0010110	0.023832	0.999786	1	4	regulation of photosynthesis, dark reaction	BP	1	BP regulation of photosynthesis, dark reaction
GO:0080152	0.023832	0.999786	1	4	regulation of reductive pentose-phosphate cycle	BP	1	BP regulation of reductive pentose-phosphate cycle
GO:0080153	0.023832	0.999786	1	4	negative regulation of reductive pentose-phosphate cycle	BP	1	BP negative regulation of reductive pentose-phosphate cycle
GO:0046102	0.0241044	0.999781	1	4	inosine metabolic process	BP	1	BP inosine metabolic process
GO:0009569	0.0244331	0.999775	1	4	chloroplast starch grain	CC	1	CC chloroplast starch grain
GO:0043036	0.0244331	0.999775	1	4	starch grain	CC	1	CC starch grain
GO:0005875	0.0244396	0.995023	4	213	microtubule associated complex	CC	1	CC microtubule associated complex
GO:0008374	0.0249837	0.994869	4	257	O-acyltransferase activity	MF	1	MF O-acyltransferase activity
GO:0046912	0.0258002	0.99799	2	59	transferase activity, transferring acyl groups, acyl groups converted into alkyl on transfer	MF	1	MF transferase activity, transferring acyl groups, acyl groups converted into alkyl on transfer
GO:0015631	0.0262799	0.994537	4	184	tubulin binding	MF	1	MF tubulin binding
GO:0006629	0.0263291	0.985749	20	2747	lipid metabolic process	BP	1	BP lipid metabolic process
GO:0008782	0.0264091	0.999708	1	6	adenosylhomocysteine nucleosidase activity	MF	1	MF adenosylhomocysteine nucleosidase activity
GO:0008930	0.0264091	0.999708	1	6	methylthioadenosine nucleosidase activity	MF	1	MF methylthioadenosine nucleosidase activity
GO:0005794	0.0265052	0.987363	14	1607	Golgi apparatus	CC	1	CC Golgi apparatus
GO:0004029	0.0265239	0.997906	2	55	aldehyde dehydrogenase (NAD) activity	MF	1	MF aldehyde dehydrogenase (NAD) activity
GO:0046898	0.0268845	0.999697	1	6	response to cycloheximide	BP	1	BP response to cycloheximide
GO:0033597	0.026905	0.999709	1	5	mitotic checkpoint complex	CC	1	CC mitotic checkpoint complex
GO:0005731	0.0276718	0.999711	1	4	nucleolus organizer region	CC	1	CC nucleolus organizer region
GO:0030874	0.0276718	0.999711	1	4	nucleolar chromatin	CC	1	CC nucleolar chromatin
GO:0005783	0.0277694	0.988007	11	1165	endoplasmic reticulum	CC	1	CC endoplasmic reticulum
GO:0035251	0.0278495	0.992726	5	402	UDP-glucosyltransferase activity	MF	1	MF UDP-glucosyltransferase activity
GO:0015293	0.0278617	0.992725	5	376	symporter activity	MF	1	MF symporter activity
GO:0005982	0.0282121	0.995676	3	137	starch metabolic process	BP	1	BP starch metabolic process
GO:0048469	0.0285324	0.997659	2	54	cell maturation	BP	1	BP cell maturation
GO:0055076	0.0288183	0.995545	3	143	transition metal ion homeostasis	BP	1	BP transition metal ion homeostasis
GO:0016603	0.0289856	0.999624	1	9	glutaminyl-peptide cyclotransferase activity	MF	1	MF glutaminyl-peptide cyclotransferase activity
GO:0017186	0.0289856	0.999624	1	9	peptidyl-pyroglutamic acid biosynthetic process, using glutaminyl-peptide cyclotransferase	BP	1	BP peptidyl-pyroglutamic acid biosynthetic process, using glutaminyl-peptide cyclotransferase
GO:0018199	0.0289856	0.999624	1	9	peptidyl-glutamine modification	BP	1	BP peptidyl-glutamine modification
GO:0000305	0.0292322	0.999677	1	4	response to oxygen radical	BP	1	BP response to oxygen radical
GO:0008101	0.0298689	0.999663	1	4	decapentaplegic signaling pathway	BP	1	BP decapentaplegic signaling pathway
GO:0015014	0.0298689	0.999663	1	4	heparan sulfate proteoglycan biosynthetic process, polysaccharide chain biosynthetic process	BP	1	BP heparan sulfate proteoglycan biosynthetic process, polysaccharide chain biosynthetic process
GO:0030202	0.0298689	0.999663	1	4	heparin metabolic process	BP	1	BP heparin metabolic process
GO:0030210	0.0298689	0.999663	1	4	heparin biosynthetic process	BP	1	BP heparin biosynthetic process
GO:0050508	0.0298689	0.999663	1	4	glucuronosyl-N-acetylglucosaminyl-proteoglycan 4-alpha-N-acetylglucosaminyltransferase activity	MF	1	MF glucuronosyl-N-acetylglucosaminyl-proteoglycan 4-alpha-N-acetylglucosaminyltransferase activity
GO:0050509	0.0298689	0.999663	1	4	N-acetylglucosaminyl-proteoglycan 4-beta-glucuronosyltransferase activity	MF	1	MF N-acetylglucosaminyl-proteoglycan 4-beta-glucuronosyltransferase activity
GO:0004451	0.0301375	0.999594	1	9	isocitrate lyase activity	MF	1	MF isocitrate lyase activity
GO:0010026	0.0303455	0.997419	2	61	trichome differentiation	BP	1	BP trichome differentiation
GO:0009830	0.0306673	0.999621	1	5	cell wall modification involved in abscission	BP	1	BP cell wall modification involved in abscission
GO:0044277	0.0306673	0.999621	1	5	cell wall disassembly	BP	1	BP cell wall disassembly
GO:0044264	0.0308723	0.988515	8	772	cellular polysaccharide metabolic process	BP	1	BP cellular polysaccharide metabolic process
GO:0033949	0.0308779	0.999568	1	10	fructan beta-(2,6)-fructosidase activity	MF	1	MF fructan beta-(2,6)-fructosidase activity
GO:0006820	0.0310801	0.988422	8	782	anion transport	BP	1	BP anion transport
GO:0015301	0.0311497	0.997318	2	57	anion:anion antiporter activity	MF	1	MF anion:anion antiporter activity
GO:0008194	0.0315073	0.989147	7	695	UDP-glycosyltransferase activity	MF	1	MF UDP-glycosyltransferase activity
GO:0009069	0.0316804	0.99491	3	174	serine family amino acid metabolic process	BP	1	BP serine family amino acid metabolic process
GO:0016798	0.0324071	0.986294	10	1218	hydrolase activity, acting on glycosyl bonds	MF	1	MF hydrolase activity, acting on glycosyl bonds
GO:0042446	0.0328256	0.994666	3	142	hormone biosynthetic process	BP	1	BP hormone biosynthetic process
GO:0046486	0.0328956	0.989693	6	514	glycerolipid metabolic process	BP	1	BP glycerolipid metabolic process
GO:0007224	0.0343406	0.999504	1	6	smoothened signaling pathway	BP	1	BP smoothened signaling pathway
GO:0017112	0.0349553	0.999486	1	6	Rab guanyl-nucleotide exchange factor activity	MF	1	MF Rab guanyl-nucleotide exchange factor activity
GO:0007568	0.0353785	0.990166	5	385	aging	BP	1	BP aging
GO:0005789	0.0354915	0.984768	10	1061	endoplasmic reticulum membrane	CC	1	CC endoplasmic reticulum membrane
GO:0051273	0.0355465	0.991865	4	262	beta-glucan metabolic process	BP	1	BP beta-glucan metabolic process
GO:0008810	0.0374308	0.996434	2	62	cellulase activity	MF	1	MF cellulase activity
GO:0047724	0.0377179	0.999372	1	8	inosine nucleosidase activity	MF	1	MF inosine nucleosidase activity
GO:0006099	0.0388988	0.993229	3	188	tricarboxylic acid cycle	BP	1	BP tricarboxylic acid cycle
GO:0019284	0.038958	0.999311	1	10	L-methionine biosynthetic process from S-adenosylmethionine	BP	1	BP L-methionine biosynthetic process from S-adenosylmethionine
GO:0016906	0.0402264	0.999299	1	7	sterol 3-beta-glucosyltransferase activity	MF	1	MF sterol 3-beta-glucosyltransferase activity
GO:0017176	0.0406252	0.999285	1	7	phosphatidylinositol N-acetylglucosaminyltransferase activity	MF	1	MF phosphatidylinositol N-acetylglucosaminyltransferase activity
GO:0030245	0.0407682	0.99593	2	64	cellulose catabolic process	BP	1	BP cellulose catabolic process
GO:0080045	0.0407962	0.999253	1	9	quercetin 3'-O-glucosyltransferase activity	MF	1	MF quercetin 3'-O-glucosyltransferase activity
GO:0046527	0.0409506	0.988157	5	443	glucosyltransferase activity	MF	1	MF glucosyltransferase activity
GO:0005093	0.0409518	0.99923	1	11	Rab GDP-dissociation inhibitor activity	MF	1	MF Rab GDP-dissociation inhibitor activity
GO:0003924	0.0411319	0.988094	5	419	GTPase activity	MF	1	MF GTPase activity
GO:0044431	0.0411359	0.980404	12	1363	Golgi apparatus part	CC	1	CC Golgi apparatus part
GO:0052691	0.0416214	0.999249	1	7	UDP-arabinopyranose mutase activity	MF	1	MF UDP-arabinopyranose mutase activity
GO:0008559	0.041806	0.995757	2	73	xenobiotic-transporting ATPase activity	MF	1	MF xenobiotic-transporting ATPase activity
GO:0042910	0.041806	0.995757	2	73	xenobiotic transporter activity	MF	1	MF xenobiotic transporter activity
GO:0046027	0.0425118	0.999178	1	10	phospholipid:diacylglycerol acyltransferase activity	MF	1	MF phospholipid:diacylglycerol acyltransferase activity
GO:0051275	0.042526	0.995654	2	65	beta-glucan catabolic process	BP	1	BP beta-glucan catabolic process
GO:0005525	0.042825	0.984264	7	730	GTP binding	MF	1	MF GTP binding
GO:0009987	0.0440063	0.968407	136	26380	cellular process	BP	1	BP cellular process
GO:0031109	0.0443931	0.999145	1	7	microtubule polymerization or depolymerization	BP	1	BP microtubule polymerization or depolymerization
GO:0045437	0.044858	0.999095	1	9	uridine nucleosidase activity	MF	1	MF uridine nucleosidase activity
GO:0050263	0.044858	0.999095	1	9	ribosylpyrimidine nucleosidase activity	MF	1	MF ribosylpyrimidine nucleosidase activity
GO:0033559	0.0456353	0.995141	2	74	unsaturated fatty acid metabolic process	BP	1	BP unsaturated fatty acid metabolic process
GO:0004564	0.0456859	0.995108	2	100	beta-fructofuranosidase activity	MF	1	MF beta-fructofuranosidase activity
GO:0004575	0.0456859	0.995108	2	100	sucrose alpha-glucosidase activity	MF	1	MF sucrose alpha-glucosidase activity
GO:0047938	0.0458591	0.999087	1	7	glucose-6-phosphate 1-epimerase activity	MF	1	MF glucose-6-phosphate 1-epimerase activity
GO:0007143	0.0464026	0.999001	1	12	female meiotic division	BP	1	BP female meiotic division
GO:0044432	0.0465659	0.978186	11	1273	endoplasmic reticulum part	CC	1	CC endoplasmic reticulum part
GO:0004455	0.0467246	0.999017	1	9	ketol-acid reductoisomerase activity	MF	1	MF ketol-acid reductoisomerase activity
GO:0042493	0.0469641	0.994915	2	78	response to drug	BP	1	BP response to drug
GO:0034059	0.0472807	0.999009	1	8	response to anoxia	BP	1	BP response to anoxia
GO:0006810	0.0474416	0.968833	35	5527	transport	BP	1	BP transport
GO:0019310	0.0476429	0.998928	1	15	inositol catabolic process	BP	1	BP inositol catabolic process
GO:0050113	0.0476429	0.998928	1	15	inositol oxygenase activity	MF	1	MF inositol oxygenase activity
GO:0006044	0.0487873	0.998944	1	8	N-acetylglucosamine metabolic process	BP	1	BP N-acetylglucosamine metabolic process
GO:0022892	0.0490912	0.972858	17	2360	substrate-specific transporter activity	MF	1	MF substrate-specific transporter activity

## Sheet: cluster_9
Gene Ontology (GO) annotations for each cluster of differentially expressed genes
numDEInCat - number of differentially expressed genes in the category
numInCat = number of total genes annotated in this category
Ontologies include: Biological Process (BP), Molecular Function (MF), and Cellular Component (CC)
Cluster 10 includes genes up-regulated in linalool+ plants, including transcripts annotated as putative (R)-(-)-linalool synthase
category	over_represented_pvalue	under_represented_pvalue	numDEInCat	numInCat	term	ontology	over_represented_FDR	go_term
GO:0000272	0	1	8	431	polysaccharide catabolic process	BP	0	BP polysaccharide catabolic process
GO:0004553	0	1	8	1123	hydrolase activity, hydrolyzing O-glycosyl compounds	MF	0	MF hydrolase activity, hydrolyzing O-glycosyl compounds
GO:0004568	0	1	8	52	chitinase activity	MF	0	MF chitinase activity
GO:0005976	0	1	8	1148	polysaccharide metabolic process	BP	0	BP polysaccharide metabolic process
GO:0006022	0	1	8	86	aminoglycan metabolic process	BP	0	BP aminoglycan metabolic process
GO:0006026	0	1	8	60	aminoglycan catabolic process	BP	0	BP aminoglycan catabolic process
GO:0006030	0	1	8	54	chitin metabolic process	BP	0	BP chitin metabolic process
GO:0006032	0	1	8	53	chitin catabolic process	BP	0	BP chitin catabolic process
GO:0006040	0	1	8	95	amino sugar metabolic process	BP	0	BP amino sugar metabolic process
GO:0008061	0	1	8	60	chitin binding	MF	0	MF chitin binding
GO:0009057	0	1	8	1309	macromolecule catabolic process	BP	0	BP macromolecule catabolic process
GO:0016052	0	1	8	895	carbohydrate catabolic process	BP	0	BP carbohydrate catabolic process
GO:0016798	0	1	8	1218	hydrolase activity, acting on glycosyl bonds	MF	0	MF hydrolase activity, acting on glycosyl bonds
GO:0016998	0	1	8	70	cell wall macromolecule catabolic process	BP	0	BP cell wall macromolecule catabolic process
GO:0044036	0	1	8	231	cell wall macromolecule metabolic process	BP	0	BP cell wall macromolecule metabolic process
GO:0046348	0	1	8	53	amino sugar catabolic process	BP	0	BP amino sugar catabolic process
GO:1901071	0	1	8	62	glucosamine-containing compound metabolic process	BP	0	BP glucosamine-containing compound metabolic process
GO:1901072	0	1	8	53	glucosamine-containing compound catabolic process	BP	0	BP glucosamine-containing compound catabolic process
GO:1901135	0	1	8	1688	carbohydrate derivative metabolic process	BP	0	BP carbohydrate derivative metabolic process
GO:1901136	0	1	8	540	carbohydrate derivative catabolic process	BP	0	BP carbohydrate derivative catabolic process
GO:1901565	0	1	8	843	organonitrogen compound catabolic process	BP	0	BP organonitrogen compound catabolic process
GO:0044248	7.11496e-11	1	8	2240	cellular catabolic process	BP	4.17066e-08	BP cellular catabolic process
GO:0006952	2.36054e-10	1	8	2657	defense response	BP	1.32354e-07	BP defense response
GO:0005975	1.04489e-09	1	8	3364	carbohydrate metabolic process	BP	5.61452e-07	BP carbohydrate metabolic process
GO:1901575	1.24548e-09	1	8	3315	organic substance catabolic process	BP	6.4247e-07	BP organic substance catabolic process
GO:1901564	1.37972e-09	1	8	3439	organonitrogen compound metabolic process	BP	6.8434e-07	BP organonitrogen compound metabolic process
GO:0009056	2.89796e-09	1	8	3685	catabolic process	BP	1.38415e-06	BP catabolic process
GO:0006950	4.66555e-07	1	8	6690	response to stress	BP	0.000214882	BP response to stress
GO:0097367	2.20372e-06	1	8	8428	carbohydrate derivative binding	MF	0.000979971	MF carbohydrate derivative binding
GO:0016787	1.05827e-05	1	8	10222	hydrolase activity	MF	0.00454913	MF hydrolase activity
GO:0050896	2.34079e-05	1	8	10963	response to stimulus	BP	0.00973769	BP response to stimulus
GO:0006807	3.15795e-05	1	8	11337	nitrogen compound metabolic process	BP	0.0127266	BP nitrogen compound metabolic process
GO:0044260	0.000203214	1	8	13822	cellular macromolecule metabolic process	BP	0.0794134	BP cellular macromolecule metabolic process
GO:0043170	0.000364567	1	8	14807	macromolecule metabolic process	BP	0.138278	BP macromolecule metabolic process
GO:0044237	0.00353529	1	8	20595	cellular metabolic process	BP	1	BP cellular metabolic process
GO:0044238	0.00375285	1	8	20603	primary metabolic process	BP	1	BP primary metabolic process
GO:0071704	0.00602449	1	8	22013	organic substance metabolic process	BP	1	BP organic substance metabolic process
GO:0003824	0.008494	1	8	24205	catalytic activity	MF	1	MF catalytic activity
GO:0031640	0.00876749	0.999967	1	51	killing of cells of other organism	BP	1	BP killing of cells of other organism
GO:0044364	0.00876749	0.999967	1	51	disruption of cells of other organism	BP	1	BP disruption of cells of other organism
GO:0001906	0.0095684	0.999961	1	54	cell killing	BP	1	BP cell killing
GO:0008152	0.0135947	1	8	24344	metabolic process	BP	1	BP metabolic process
GO:0035821	0.0180697	0.999858	1	100	modification of morphology or physiology of other organism	BP	1	BP modification of morphology or physiology of other organism
GO:0009987	0.024731	1	8	26380	cellular process	BP	1	BP cellular process
GO:0005488	0.0397124	1	8	27936	binding	MF	1	MF binding

## Sheet: cluster_10
Gene Ontology (GO) annotations for each cluster of differentially expressed genes
numDEInCat - number of differentially expressed genes in the category
numInCat = number of total genes annotated in this category
Ontologies include: Biological Process (BP), Molecular Function (MF), and Cellular Component (CC)
Cluster 10 includes genes up-regulated in linalool+ plants, including transcripts annotated as putative (R)-(-)-linalool synthase
category	over_represented_pvalue	under_represented_pvalue	numDEInCat	numInCat	term	ontology	over_represented_FDR	go_term
GO:0010333	1.90641e-06	1	3	81	terpene synthase activity	MF	0.0183458	MF terpene synthase activity
GO:0016838	2.8452e-06	1	3	87	carbon-oxygen lyase activity, acting on phosphates	MF	0.0183458	MF carbon-oxygen lyase activity, acting on phosphates
GO:0016835	0.000545456	0.999982	3	484	carbon-oxygen lyase activity	MF	1	MF carbon-oxygen lyase activity
GO:0019029	0.00059661	1	1	1	helical viral capsid	CC	1	CC helical viral capsid
GO:0000287	0.000783455	0.99997	3	519	magnesium ion binding	MF	1	MF magnesium ion binding
GO:0004151	0.00145931	0.999999	1	3	dihydroorotase activity	MF	1	MF dihydroorotase activity
GO:0051761	0.0021531	0.999998	1	5	sesquiterpene metabolic process	BP	1	BP sesquiterpene metabolic process
GO:0051762	0.0021531	0.999998	1	5	sesquiterpene biosynthetic process	BP	1	BP sesquiterpene biosynthetic process
GO:0033809	0.00228539	0.999998	1	6	anthocyanin 6''-O-malonyltransferase activity	MF	1	MF anthocyanin 6''-O-malonyltransferase activity
GO:0019013	0.00413809	0.999992	1	15	viral nucleocapsid	CC	1	CC viral nucleocapsid
GO:0016812	0.00534969	0.999988	1	12	hydrolase activity, acting on carbon-nitrogen (but not peptide) bonds, in cyclic amides	MF	1	MF hydrolase activity, acting on carbon-nitrogen (but not peptide) bonds, in cyclic amides
GO:0033383	0.00539872	0.999987	1	13	geranyl diphosphate metabolic process	BP	1	BP geranyl diphosphate metabolic process
GO:0016829	0.00544699	0.999592	3	1065	lyase activity	MF	1	MF lyase activity
GO:0019028	0.00554004	0.999986	1	21	viral capsid	CC	1	CC viral capsid
GO:0044205	0.00585689	0.999985	1	13	'de novo' UMP biosynthetic process	BP	1	BP 'de novo' UMP biosynthetic process
GO:0019856	0.00610465	0.999984	1	14	pyrimidine nucleobase biosynthetic process	BP	1	BP pyrimidine nucleobase biosynthetic process
GO:0010334	0.00614613	0.999983	1	15	sesquiterpene synthase activity	MF	1	MF sesquiterpene synthase activity
GO:0015203	0.00708178	0.999978	1	14	polyamine transmembrane transporter activity	MF	1	MF polyamine transmembrane transporter activity
GO:0015846	0.00708178	0.999978	1	14	polyamine transport	BP	1	BP polyamine transport
GO:1902047	0.00708178	0.999978	1	14	polyamine transmembrane transport	BP	1	BP polyamine transmembrane transport
GO:0046246	0.00718306	0.999977	1	16	terpene biosynthetic process	BP	1	BP terpene biosynthetic process
GO:0030430	0.0082144	0.99997	1	22	host cell cytoplasm	CC	1	CC host cell cytoplasm
GO:0010205	0.00918979	0.999962	1	24	photoinhibition	BP	1	BP photoinhibition
GO:0043155	0.00918979	0.999962	1	24	negative regulation of photosynthesis, light reaction	BP	1	BP negative regulation of photosynthesis, light reaction
GO:0033646	0.0093352	0.99996	1	28	host intracellular part	CC	1	CC host intracellular part
GO:0048016	0.0106914	0.999948	1	28	inositol phosphate-mediated signaling	BP	1	BP inositol phosphate-mediated signaling
GO:0008299	0.0106982	0.99951	2	423	isoprenoid biosynthetic process	BP	1	BP isoprenoid biosynthetic process
GO:0044423	0.0107614	0.999947	1	40	virion part	CC	1	CC virion part
GO:0042555	0.0110502	0.999944	1	32	MCM complex	CC	1	CC MCM complex
GO:0010206	0.0111074	0.999943	1	38	photosystem II repair	BP	1	BP photosystem II repair
GO:0046112	0.0124919	0.999928	1	39	nucleobase biosynthetic process	BP	1	BP nucleobase biosynthetic process
GO:0009765	0.0134667	0.999917	1	38	photosynthesis, light harvesting	BP	1	BP photosynthesis, light harvesting
GO:0006720	0.014438	0.999226	2	494	isoprenoid metabolic process	BP	1	BP isoprenoid metabolic process
GO:0033643	0.0149245	0.999897	1	46	host cell part	CC	1	CC host cell part
GO:0044217	0.0149245	0.999897	1	46	other organism part	CC	1	CC other organism part
GO:0009668	0.0152115	0.999894	1	41	plastid membrane organization	BP	1	BP plastid membrane organization
GO:0010027	0.0152115	0.999894	1	41	thylakoid membrane organization	BP	1	BP thylakoid membrane organization
GO:0006270	0.0153571	0.999892	1	40	DNA replication initiation	BP	1	BP DNA replication initiation
GO:0030091	0.0155566	0.999888	1	47	protein repair	BP	1	BP protein repair
GO:0042214	0.0158173	0.999885	1	40	terpene metabolic process	BP	1	BP terpene metabolic process
GO:0006222	0.016329	0.999877	1	39	UMP biosynthetic process	BP	1	BP UMP biosynthetic process
GO:0009173	0.016329	0.999877	1	39	pyrimidine ribonucleoside monophosphate metabolic process	BP	1	BP pyrimidine ribonucleoside monophosphate metabolic process
GO:0009174	0.016329	0.999877	1	39	pyrimidine ribonucleoside monophosphate biosynthetic process	BP	1	BP pyrimidine ribonucleoside monophosphate biosynthetic process
GO:0046049	0.016329	0.999877	1	39	UMP metabolic process	BP	1	BP UMP metabolic process
GO:0006206	0.0165596	0.999874	1	38	pyrimidine nucleobase metabolic process	BP	1	BP pyrimidine nucleobase metabolic process
GO:0042548	0.016617	0.999872	1	53	regulation of photosynthesis, light reaction	BP	1	BP regulation of photosynthesis, light reaction
GO:0004445	0.0171445	0.999865	1	42	inositol-polyphosphate 5-phosphatase activity	MF	1	MF inositol-polyphosphate 5-phosphatase activity
GO:0046030	0.0171445	0.999865	1	42	inositol trisphosphate phosphatase activity	MF	1	MF inositol trisphosphate phosphatase activity
GO:0052658	0.0171445	0.999865	1	42	inositol-1,4,5-trisphosphate 5-phosphatase activity	MF	1	MF inositol-1,4,5-trisphosphate 5-phosphatase activity
GO:0052659	0.0171445	0.999865	1	42	inositol-1,3,4,5-tetrakisphosphate 5-phosphatase activity	MF	1	MF inositol-1,3,4,5-tetrakisphosphate 5-phosphatase activity
GO:0046855	0.0174491	0.99986	1	45	inositol phosphate dephosphorylation	BP	1	BP inositol phosphate dephosphorylation
GO:0071545	0.0174491	0.99986	1	45	inositol phosphate catabolic process	BP	1	BP inositol phosphate catabolic process
GO:0010588	0.017681	0.999856	1	42	cotyledon vascular tissue pattern formation	BP	1	BP cotyledon vascular tissue pattern formation
GO:0052743	0.0177488	0.999855	1	43	inositol tetrakisphosphate phosphatase activity	MF	1	MF inositol tetrakisphosphate phosphatase activity
GO:0006644	0.0179773	0.998918	2	539	phospholipid metabolic process	BP	1	BP phospholipid metabolic process
GO:0046838	0.0188516	0.999836	1	48	phosphorylated carbohydrate dephosphorylation	BP	1	BP phosphorylated carbohydrate dephosphorylation
GO:0032957	0.0193298	0.999827	1	50	inositol trisphosphate metabolic process	BP	1	BP inositol trisphosphate metabolic process
GO:0046856	0.0200142	0.999815	1	49	phosphatidylinositol dephosphorylation	BP	1	BP phosphatidylinositol dephosphorylation
GO:0009129	0.020877	0.999798	1	57	pyrimidine nucleoside monophosphate metabolic process	BP	1	BP pyrimidine nucleoside monophosphate metabolic process
GO:0009130	0.020877	0.999798	1	57	pyrimidine nucleoside monophosphate biosynthetic process	BP	1	BP pyrimidine nucleoside monophosphate biosynthetic process
GO:0043467	0.0232617	0.999748	1	75	regulation of generation of precursor metabolites and energy	BP	1	BP regulation of generation of precursor metabolites and energy
GO:0010109	0.0233673	0.999746	1	71	regulation of photosynthesis	BP	1	BP regulation of photosynthesis
GO:0052745	0.0235376	0.999743	1	58	inositol phosphate phosphatase activity	MF	1	MF inositol phosphate phosphatase activity
GO:0009220	0.023613	0.999741	1	62	pyrimidine ribonucleotide biosynthetic process	BP	1	BP pyrimidine ribonucleotide biosynthetic process
GO:0009218	0.0237733	0.999737	1	63	pyrimidine ribonucleotide metabolic process	BP	1	BP pyrimidine ribonucleotide metabolic process
GO:0046132	0.0239433	0.999733	1	64	pyrimidine ribonucleoside biosynthetic process	BP	1	BP pyrimidine ribonucleoside biosynthetic process
GO:0046134	0.0254304	0.999699	1	67	pyrimidine nucleoside biosynthetic process	BP	1	BP pyrimidine nucleoside biosynthetic process
GO:0046839	0.0258072	0.99969	1	65	phospholipid dephosphorylation	BP	1	BP phospholipid dephosphorylation
GO:0016168	0.0258942	0.999686	1	93	chlorophyll binding	MF	1	MF chlorophyll binding
GO:0046174	0.0267773	0.999665	1	75	polyol catabolic process	BP	1	BP polyol catabolic process
GO:0010067	0.0272163	0.999653	1	88	procambium histogenesis	BP	1	BP procambium histogenesis
GO:0046131	0.0277429	0.999641	1	74	pyrimidine ribonucleoside metabolic process	BP	1	BP pyrimidine ribonucleoside metabolic process
GO:0010305	0.0286243	0.999617	1	71	leaf vascular tissue pattern formation	BP	1	BP leaf vascular tissue pattern formation
GO:0043647	0.0292758	0.9996	1	72	inositol phosphate metabolic process	BP	1	BP inositol phosphate metabolic process
GO:0009522	0.0293244	0.999597	1	93	photosystem I	CC	1	CC photosystem I
GO:0006213	0.0294378	0.999595	1	79	pyrimidine nucleoside metabolic process	BP	1	BP pyrimidine nucleoside metabolic process
GO:0009535	0.0299485	0.997632	2	816	chloroplast thylakoid membrane	CC	1	CC chloroplast thylakoid membrane
GO:0055035	0.0299716	0.99763	2	817	plastid thylakoid membrane	CC	1	CC plastid thylakoid membrane
GO:0006221	0.0305796	0.999562	1	89	pyrimidine nucleotide biosynthetic process	BP	1	BP pyrimidine nucleotide biosynthetic process
GO:0034357	0.0308828	0.997518	2	826	photosynthetic membrane	CC	1	CC photosynthetic membrane
GO:0042651	0.0308828	0.997518	2	826	thylakoid membrane	CC	1	CC thylakoid membrane
GO:0006220	0.0328453	0.999494	1	95	pyrimidine nucleotide metabolic process	BP	1	BP pyrimidine nucleotide metabolic process
GO:0009112	0.0335972	0.99947	1	92	nucleobase metabolic process	BP	1	BP nucleobase metabolic process
GO:0010065	0.0348664	0.999428	1	106	primary meristem tissue development	BP	1	BP primary meristem tissue development
GO:0044436	0.0364521	0.996795	2	899	thylakoid part	CC	1	CC thylakoid part
GO:0048508	0.0372197	0.999348	1	110	embryonic meristem development	BP	1	BP embryonic meristem development
GO:0009523	0.037435	0.99934	1	113	photosystem II	CC	1	CC photosystem II
GO:0019637	0.0388026	0.993925	3	2056	organophosphate metabolic process	BP	1	BP organophosphate metabolic process
GO:0009756	0.0389826	0.999286	1	90	carbohydrate mediated signaling	BP	1	BP carbohydrate mediated signaling
GO:0010182	0.0389826	0.999286	1	90	sugar mediated signaling pathway	BP	1	BP sugar mediated signaling pathway
GO:0044255	0.0390757	0.993865	3	2096	cellular lipid metabolic process	BP	1	BP cellular lipid metabolic process
GO:0004222	0.041558	0.999186	1	108	metalloendopeptidase activity	MF	1	MF metalloendopeptidase activity
GO:0009644	0.0424367	0.999151	1	105	response to high light intensity	BP	1	BP response to high light intensity
GO:0046164	0.0426571	0.999141	1	122	alcohol catabolic process	BP	1	BP alcohol catabolic process
GO:0031977	0.0445951	0.99906	1	126	thylakoid lumen	CC	1	CC thylakoid lumen
GO:0072528	0.0454864	0.999022	1	124	pyrimidine-containing compound biosynthetic process	BP	1	BP pyrimidine-containing compound biosynthetic process
GO:1901616	0.0461698	0.998992	1	133	organic hydroxy compound catabolic process	BP	1	BP organic hydroxy compound catabolic process
GO:0071322	0.0477699	0.998921	1	116	cellular response to carbohydrate stimulus	BP	1	BP cellular response to carbohydrate stimulus
GO:0048507	0.0482216	0.998899	1	133	meristem development	BP	1	BP meristem development
GO:0019932	0.0485774	0.998883	1	122	second-messenger-mediated signaling	BP	1	BP second-messenger-mediated signaling

[truncated: 2 more sheets: cluster_11, cluster_12]
