# Supplementary material for: Differential gene expression associated with a floral scent polymorphism in the evening primrose Oenothera harringtonii (Onagraceae)
Source: BMC Genomics. 2022 Feb 12;23:124. doi: 10.1186/s12864-022-08370-6 (PMC8840323; doi:10.1186/s12864-022-08370-6)
Supplement: Supplementary file 4 — Additional file 4. Floral volatile data from parental field populations of Oenothera harringtonii used to set up transcriptomics experiments in greenhouse-grown plants. [file 12864_2022_8370_MOESM4_ESM.xlsx]

## Sheet: combined 09-10
	Table XX: Floral volatile data from parental field populations of Oenothera harringtonii used to set up transcriptomics experiments in greenhouse-grown plants.
	Floral scent was collected in situ from one living, attached flower per plant during the first hr of anthesis. Volatile samples were analyzed by GC-MS as described in
	Methods for samples taken from greenhouse-grown plants. Note that SB is shown as a surrogate for the BMR population, because they are geographically closest.
	Although seeds were collected opportunistically from the BMR site for this project, plants were not available for floral scent collection.
	Compounds shown in bold font were confirmed through co-injection with authentic standards. Other compound identities are inferred from mass spectral library match
	and co-occurrence with related compounds or isomers. Data shown are mean +/- SEM % of total emissions for each compound. Note that although the chemical
	complexity (for minor components), flower size and total emission rates differed between years (compare FLO and DC), populations designated as linalool + (blue)
	and linalool - (orange) remained consistent between years.
	compound name	biosynth.	ret time			2009 Field Data							2010 Field Data
	parent population	class*	(min)	FLO		SB		DC			FLO		BLOOM		DC
				mean	sem	mean	sem	mean	sem		mean	sem	mean	sem	mean	sem
	β-myrcene	T(M)	6.07	0.4185	0.0364597	0.424	0.0468478	0.586	0.0350986		0.149764	0.0256303	0.505571	0.0354649	0.317242	0.021016
	Z-β-ocimene	T(M)	6.85	1.1515	0.101442	1.202	0.151156	1.8155	0.114608		0.470469	0.0794863	1.52926	0.0858633	1.0032	0.0706519
	E-β-ocimene	T(M)	7.08	59.6825	4.06175	69.957	5.35468	86.13	3.34509		55.2703	5.89021	95.5016	0.412672	95.4832	1.72868
	ocimene epoxide isomer	T(M)	8.53	0.5105	0.0957137	0.45	0.10808	0.1965	0.0557339		0.0979357	0.0349686	0.545554	0.0786584	0.203401	0.0746578
	ocimene epoxide isomer	T(M)	9.37	0.012	0.00321336	0.014	0.0068687	0.0195	0.00276147		0.00352662	0.00194439	0.043174	0.0176273	0.00345508	0.00233517
	(R)-(-)-linalool	T(M)	9.85	31.568	3.94994	24.872	5.68341	0.028	0.0128943		40.0441	5.85509	0.00460665	0.00288098	0.0129562	0.0119733
	β-elemene	T(S)	10.4					0.0035	0.00221049
	β-caryophyllene	T(S)	10.53	0.2555	0.0676087	0.283	0.094373	1.184	0.337848		0.140912	0.0523838	0.365309	0.0869261	0.202972	0.0670653
	methyl benzoate	B	10.682	0.0155	0.00555029	0.007	0.00423257	0.0045	0.00223419				0.00913301	0.00498852	0.00504493	0.00504493
	phenylacetaldehyde	T(S)	10.84					0.0005	0.000500239
	β-farnesene	T(S)	10.97	0.0055	0.00211301	0.003	0.00300216	0.0225	0.00943221
	α-humulene	T(S)	11.19	0.021	0.00660858	0.013	0.0065111	0.1195	0.0368992				0.0032085	0.00321098
	α-terpineol	T(M)	11.22	0.353	0.340553			0.01	0.00377149
	methyl geranate	T(M)	11.25	0.005	0.0032863			0.0015	0.00150072
	Z,E-α-farnesene	T(S)	11.44	0.002	0.000918101			0.021	0.00986959
	E,E-α-farnesene	T(S)	11.639	0.0045	0.00169833	0.005	0.00341811	7.945	3.68634		0.0175188	0.0179024			1.81345	1.81345
	TMTT**	T(I)	12.08	0.001	0.00100048			0.005	0.00407367
	geraniol	T(M)	12.33	0.6475	0.634666	0.003	0.00300216	0.0035	0.00350167				0.00338242	0.00338503
	2-phenylethanol	B	12.88					0.002	0.00200096
	phenylacetonitrile	B(N)	13.079					0.015	0.0150072				0.010357	0.010365
	caryophyllene oxide	T(S)	13.6	0.0565	0.0305732	0.012	0.00814357	0.3175	0.10591
	nerolidol	T(S)	13.73	0.001	0.000688576
	nitrophenylethane	B(N)	14.45					0.005	0.00500239				0.0019411	0.00137073
	methyl farnesoate	T(S)	14.969	2.2765	0.947664	1.018	0.186311	1.0165	0.361783		1.0573	0.284331	0.664395	0.200544	0.525405	0.240698
	isophytol	T(D)	15.34	0.1835	0.0845553	0.105	0.0323841	0.05	0.0113145		0.326286	0.147416	0.0574365	0.0148743	0.164383	0.114523
	jasmine lactone	F	15.37	1.4125	0.448443	1.029	0.229	0.002	0.00200096		1.31838	0.335731
	phenylacetaldoxime	B	15.57					0.0165	0.0165079
	E,E-farnesol	T(S)	15.78	1.4165	0.747962	0.603	0.145822	0.4795	0.122011		1.10346	0.438382	0.755061	0.18508	0.265311	0.122838
	N plants sampled			20		10		20			15		15		15
	cum # cpds			22		17		27			12		15		12
	mean +/- SEM # cpds			13.6	0.708932	11.9	0.688729	12.65	0.723187		8.7	0.4	9.3	0.4	6.3	0.6
	dry mass, g			0.0818269	0.00291547	0.063286	0.00321655	0.0858124	0.00412488		0.0944929	0.00349368	0.1002	0.0057	0.1235	0.0476
	total scent ng/fl/hr			19373.6	2838.19	13068	2045.27	16816.1	1676.41		6947.3	1644.61	16537.9	1871.18	10292.6	1894
	total scent ng/g flw/hr			248339	38463.6	206265	30747	201005	19274.4		72791.6	17725.5	168562	18903.6	131333	24094.1
	* Key to biosynthetic classes: T = terpenoids; M = monoterpenoids, C10; S = sesquiterpenoids, C15; D = diterpenoids, C20; I = irregular terpenoids (C atoms not a multiple of 5)
		B = benzenoids; N = benzenoids with a N atom; F = fatty acid derivative (in this case a lactone)
	** TMTT = 4,8,12-trimethyl-1,3,7,11-tridecatetraene
